# Supplementary material for: Energy conservation education intervention for people with end-stage kidney disease receiving haemodialysis (EVEREST): protocol for a cluster randomised control trial
Source: PubMed Central journal article supplement — BMJ Open. 2022 Feb 21;12(2):e056544. doi: 10.1136/bmjopen-2021-056544 (PMC8862487; doi:10.1136/bmjopen-2021-056544), 2022-02-21
Supplement: bmjopen-2021-056544.draft_revisions.pdf [file bmjopen-2021-056544.draft_revisions.pdf]

# BMJ Open

BMJ Open is committed to open peer review. As part of this commitment we make the peer review history of every article we publish publicly available.

When an article is published we post the peer reviewers' comments and the authors' responses online. We also post the versions of the paper that were used during peer review. These are the versions that the peer review comments apply to.

The versions of the paper that follow are the versions that were submitted during the peer review process. They are not the versions of record or the final published versions. They should not be cited or distributed as the published version of this manuscript.

BMJ Open is an open access journal and the full, final, typeset and author-corrected version of record of the manuscript is available on our site with no access controls, subscription charges or pay-per-view fees (<http://bmjopen.bmj.com>).

If you have any questions on BMJ Open's open peer review process please email [info.bmjopen@bmj.com](mailto:info.bmjopen@bmj.com)

# BMJ Open

## Energy Conservation Education Intervention for People with End-stage Kidney Disease Receiving Haemodialysis (EVEREST): protocol for a cluster randomised control trial

|                               |                                                                                                                                                                                                                                                                                                                                                                                                                         |
|-------------------------------|-------------------------------------------------------------------------------------------------------------------------------------------------------------------------------------------------------------------------------------------------------------------------------------------------------------------------------------------------------------------------------------------------------------------------|
| Journal:                      | <i>BMJ Open</i>                                                                                                                                                                                                                                                                                                                                                                                                         |
| Manuscript ID                 | bmjopen-2021-056544                                                                                                                                                                                                                                                                                                                                                                                                     |
| Article Type:                 | Protocol                                                                                                                                                                                                                                                                                                                                                                                                                |
| Date Submitted by the Author: | 18-Aug-2021                                                                                                                                                                                                                                                                                                                                                                                                             |
| Complete List of Authors:     | Sharma, Sita; Griffith University, School of Nursing and Midwifery<br>Alexander, Kimberly ; Queensland University of Technology, School of Nursing<br>Green, Theresa; The University of Queensland, ; Metro North Hospital and Health Service, Surgical Treatment and Rehabilitation Service<br>Wu, Min-Lin (Winnie); Griffith University, School of Nursing and Midwifery<br>Bonner, Ann; Griffith University, Nursing |
| Keywords:                     | Dialysis < NEPHROLOGY, End stage renal failure < NEPHROLOGY, Chronic renal failure < NEPHROLOGY                                                                                                                                                                                                                                                                                                                         |
|                               |                                                                                                                                                                                                                                                                                                                                                                                                                         |

SCHOLARONE™  
Manuscripts

**TITLE PAGE**

**FULL TITLE:** Energy Conservation Education Intervention for People with End-stage Kidney Disease Receiving Haemodialysis (EVEREST): protocol for a cluster randomised control trial

**AUTHORS**

Sita Sharma<sup>1,2</sup>, PhD Candidate

Kimberly E. Alexander<sup>3</sup>, Associate Professor

Theresa Green<sup>4,5</sup>, Professor

Min-Lin (Winnie) Wu<sup>1,2</sup>, Lecturer

Ann Bonner<sup>1,2,6</sup>, Professor

**INSTITUTIONAL AFFILIATIONS:**

<sup>1</sup> School of Nursing and Midwifery, Griffith University, Nathan, Australia

<sup>2</sup> Menzies Health Institute Queensland, Griffith University, Brisbane, Queensland, Australia

<sup>3</sup> School of Nursing, Queensland University of Technology, Brisbane, Australia

<sup>4</sup> School of Nursing, Midwifery and Social Work, University of Queensland, Brisbane, Australia

<sup>5</sup> Surgical Treatment & Rehabilitation Service, Metro North Hospital and Health Service, Brisbane, Australia

<sup>6</sup> Kidney Health Service, Royal Brisbane and Women's Hospital, Brisbane, Australia.

**Corresponding author:**

Sita Sharma, School of Nursing and Midwifery and Menzies Health Institute Queensland, Griffith University, Building N48, 170 Kessels Road, Nathan, QLD, 4111, Australia. E-mail:

[sita.sharma@griffithuni.edu.au](mailto:sita.sharma@griffithuni.edu.au)

## Abstract

**Introduction:** Multiple symptoms occur in people with kidney failure receiving haemodialysis (HD) and these symptoms have a negative impact on health-related quality of life (HRQoL). Fatigue, the most common symptom, is debilitating and difficult to manage. Educational interventions involving energy conservation strategies are helpful in reducing fatigue, however the effectiveness of energy conservation has not been previously studied in those receiving HD. The aim of this study is to evaluate the effectiveness of an energy conservation education intervention for people with end-stage kidney disease receiving HD (EVEREST trial).

**Methods and analysis:** A pragmatic cluster randomised controlled trial with repeated measure will be used. One hundred and twenty-six participants from tertiary level dialysis centre will be cluster randomised to the intervention and control group according to HD treatment day. The intervention group will receive usual care along with a structured energy conservation intervention over 12 weeks comprising three individual face-to-face educational intervention sessions, one booster session, and a booklet. The control group will receive usual care from their healthcare providers and a booklet at the end of the study. The primary outcome is fatigue, and the secondary outcomes are other renal symptoms, occupational performance, and HRQoL. Intention-to-treat analysis will occur and will include a change in primary and secondary outcomes.

**Ethics and dissemination:** Ethical approval has obtained from the Human Research Committee of the Griffith University and Nepal Health Research Council. The results of this research will be published and presented in a variety of forums.

**Trial registration number:** NCT04360408; Pre-results

### Strengths and limitations of this study

- This study will provide empirical evidence about the effectiveness of an education regarding energy conservation for fatigue management that can be integrated into the everyday life of people receiving HD.
- This study will be conducted in a developing country, and the educational material designed is simple and easily understood by people with limited education.
- This study includes the recruitment of participants from one dialysis centre in Nepal.
- The population of the study is limited to the people receiving HD, which limits the generalizability of the finding to people receiving conservative treatment and other forms of KRT.

## Introduction

Chronic kidney disease (CKD) is both a major global public health problem and contributor to the overall burden of non-communicable disease <sup>1</sup>, affecting about 13% of the global population.<sup>2</sup> It is defined as any degree of kidney damage or decline in kidney function or estimated glomerular filtration rate (eGFR) < 60.0ml/min/1.73m<sup>2</sup> for three months or longer irrespective of the cause.<sup>3</sup> The classification of CKD is based on cause of disease, level of GFR and level of albuminuria which is collectively called CGA classification.<sup>4</sup> If eGFR < 15 ml/min/1.73m<sup>2</sup> or treated by dialysis, then the term “kidney failure” is used to specify CKD stage G5.<sup>4</sup> There is no renal registry in Nepal; however, it was estimated that both the incidence and prevalence of kidney failure to be approximately 100 per million population (pmp). From this estimation, it is anticipated that approximately 2,900 people have kidney failure in Nepal.<sup>5</sup>

Haemodialysis is the most common modality of treatment for people with kidney failure and usually is prescribed three times per week, with a duration of 4-5 hours per session.<sup>6</sup> It can be performed either in-centre in a hospital or a satellite unit or at home.<sup>7</sup> This treatment impacts on most aspects of daily life leading to decreased health-related quality of life (HRQoL).<sup>8</sup> Being on HD also affects employment and being able to undertake routine social activities <sup>9</sup> as well as affecting family members.<sup>10, 11</sup>

Physical and psychological symptoms are common in this population and may be related to the underlying pathologies, presence of multiple co-morbidities, accumulation of uraemic toxins or fluids, medication side effects, and inadequacy of dialysis.<sup>12</sup> Several studies have described symptom burden in this population.<sup>12-16</sup> Almutary et al <sup>13</sup>, who compared those not on dialysis with those receiving either HD or PD, reported that both symptom prevalence and severity was highest in those receiving HD, and that about 85% reported being fatigued.

1  
2  
3 Fatigue is an overwhelming subjective experience of discomfort associated with physical and  
4 mental exhaustion.<sup>17</sup> Fatigue in people with kidney failure negatively impacts individuals' day  
5 to day activities,<sup>18, 19</sup> HRQoL,<sup>20</sup> increases hospitalisations and mortality.<sup>21</sup> Various factors have  
6 been associated with fatigue in kidney failure such as demographic characteristics,<sup>22</sup> elevated  
7 urea levels, anaemia, depression, anxiety, and sleep disturbances.<sup>22, 23</sup> Medication side effects  
8 and HD treatment-related factors like dialysis inadequacy and excessive ultrafiltration have  
9 been associated with fatigue.<sup>21, 24, 25</sup>

10  
11  
12  
13  
14  
15  
16  
17  
18  
19  
20  
21 Managing fatigue is essential in improving HRQoL for individuals on HD. It can be argued  
22 that adults receiving HD can benefit from self-symptom management techniques to reduce  
23 fatigue and other kidney failure symptoms.<sup>26</sup> Previous research has shown that exercise could  
24 reduce fatigue;<sup>22, 27</sup> however exercise may not be safe for all people.<sup>28</sup> Educational  
25 interventions are believed to improve cancer-related fatigue<sup>29</sup> and there is some evidence to  
26 support this in earlier stages of CKD.<sup>30</sup> Likewise, education about energy conservation is  
27 another approach to manage fatigue that has shown a significant reduction in fatigue in other  
28 chronic diseases, including multiple sclerosis<sup>31</sup> and cancer.<sup>32, 33</sup> However, its effectiveness has  
29 not yet been tested in the HD population.

30  
31  
32  
33  
34  
35  
36  
37  
38  
39  
40  
41  
42  
43  
44  
45 In a systematic review, Blikman et al.<sup>31</sup> included six interventional studies which examined  
46 the effects of energy conservation management (ECM) for fatigue and HRQoL in people with  
47 multiple sclerosis (MS). Four studies included in this review used ECM intervention program  
48 based on Packers' "Managing Fatigue" course; two were guided by the MS fatigue guidelines.  
49 Interventions in these studies were delivered in group format and face-to-face except in the  
50 study by Finlayson et al<sup>34</sup> where the intervention was delivered via teleconference method.  
51 Meta-analysis of two studies<sup>34, 35</sup> included in this review showed that ECM intervention was  
52 more effective than no intervention in reducing the impact of fatigue on the cognitive subscale  
53  
54  
55  
56  
57  
58  
59  
60

(MD=-2.91; 95% CI -4.32 to -1.50), the physical subscale (MD = -2.99; 95% CI -4.47 to -1.52), and the psychological subscale (MD = -6.05; 95% CI -8.72 to -3.37).<sup>31</sup> The same study also revealed that ECM treatment improved three domains of HRQoL, namely role physical (MD= 17.26; 95% CI 9.69 to 24.84), social function (MD = 6.91; 95% CI 1.32 to 12.49), and mental health (MD = 5.55; 95% CI 2.27 to 8.83). Another study evaluated the effect of energy conservation strategies in persons with breast cancer experiencing fatigue.<sup>32</sup> In this study, the intervention was delivered face-to-face in the form of small group discussion. Duration of each session was 90 mins and sessions were conducted weekly for the period of 5 weeks. The result of this study showed that application of energy conservation strategies significantly reduced the status of cancer-related fatigue in persons with breast cancer over the 8 weeks of follow-up period ( $F = 69.8, p < 0.001$ ).<sup>32</sup>

Despite fatigue being highly prevalent in those receiving HD, a recent systematic review did not find any interventional studies that used an educational approach for self-management to reduce symptom and improve HRQoL in people undergoing HD.<sup>36</sup> Thus, this study aims to evaluate the effectiveness of an energy conservation education intervention for people with kidney failure receiving haemodialysis (EVEREST trial) in Nepal.

### **Research hypotheses**

People with kidney failure on HD who receive EVEREST and usual care are more likely to:

H1: have reduced fatigue severity, frequency and interference compared to people undergoing HD who received usual care.

H2: have reduced number and severity of other renal symptom compared to people undergoing HD who received usual care.

H3 have improved occupational performance and satisfaction with that performance compared to people undergoing HD who received usual care.



1  
2  
3 H4: have improved HRQoL compared to people undergoing HD who received usual care  
4  
5  
6  
7

## 8 **Methods and analysis**

### 10 **Study design**

11  
12  
13 A pragmatic cluster randomised control trial (CRT [pCRT]) design will be used. A pragmatic  
14  
15 design attempts to find an answer to whether an intervention will work under usual conditions  
16  
17 in a real clinical setting,<sup>37</sup> therefore a few exclusion criteria will be applied. To avoid possible  
18  
19 treatment contamination because participants on the same dialysis day may interact with each  
20  
21 other as they spend four hours in close proximity during dialysis, a cluster design will be used,  
22  
23 with cluster cohorts based on the day of dialysis. The CONSORT flow diagram in Figure 1  
24  
25 presents the study design.  
26  
27  
28  
29  
30

### 31 **Setting**

32  
33 The study will be conducted at the National Kidney Centre (NKC), Kathmandu, Nepal. The  
34  
35 NKC is the non-profit, non-governmental organisation with the largest HD treatment facility  
36  
37 in Nepal. The NKC can serve around 240 people for HD treatment in a month. Currently, the  
38  
39 centre has 42 dialysis machines. The NKC provides free HD service to all patients as mandated  
40  
41 by the Ministry of Health and Population, Nepal.  
42  
43  
44  
45  
46  
47

### 48 **Sample size**

49  
50 G power software<sup>TM</sup> was used to calculate the sample size by performing the priori power  
51  
52 analysis for an independent group two-tailed t-test. A previous study<sup>38</sup> in which a large effect  
53  
54 size (Cohen's *d* from 0.90 - 1.5) was demonstrated, was used for the calculation. To have  
55  
56 resultant 80% power, a large effect size of 0.8 and a significance of 0.05, 52 participants will  
57  
58 be needed (26 in each group). As this study is pCRT, and assuming a moderate intra-cluster  
59  
60

1  
2  
3 coefficient (ICC) of 0.03 to compensate for attrition and the possibility of non-normality of  
4 data, the calculation is further inflated by 20% and again 15% respectively. After adjusting for  
5 design effect, attrition, and a non-parametric statistic, a final sample size of 126 (63 in each  
6 group) is required.  
7  
8  
9  
10  
11  
12

### 13 14 **Eligibility criteria**

15  
16 Participants diagnosed with ESKD and undergoing haemodialysis for  $\geq 3$  months, aged 18  
17 years and above, able to speak and understand Nepali language and willing to participate will  
18 be included in this study. Participants who are in the early stage of CKD or not dependent on  
19 HD, those acutely ill, diagnosed with cognitive impairment and those who are not willing to  
20 participate will be excluded. Participants may be withdrawn from the study at any time due to  
21 a safety concern, if they became sick or if they are non-compliant with the trial procedure.  
22  
23  
24  
25  
26  
27  
28  
29  
30  
31  
32

### 33 **Study intervention**

#### 34 ***Intervention group***

35  
36 The intervention group will receive both the usual care from their healthcare providers and the  
37 12 weeks of EVEREST intervention. The EVEREST uses education to teach individuals to  
38 recognise and modify their daily activities to reduce fatigue by analysing the daily work, home  
39 and leisure activities in all aspects of their life.<sup>39</sup> This intervention helps to develop a positive  
40 attitude towards decision-making and the maximum use of available energy.<sup>31</sup> It is designed to  
41 reduce the frequency, severity and impact of fatigue, increases a person's use of energy-  
42 conservation strategies and improves their confidence level and their ability to manage  
43 fatigue.<sup>31</sup> Seven energy conservation strategies will form the content EVEREST intervention  
44 (see table 1); each will be adapted to fit with the daily activities of Nepalese people. These  
45 energy conservation strategies were adopted from energy conservation course "Managing  
46 Fatigue" developed by Packer et al.<sup>40</sup>  
47  
48  
49  
50  
51  
52  
53  
54  
55  
56  
57  
58  
59  
60

**Table 1 Summary of the content of the EVEREST**

| Session               | Goal and objectives                                                                                                                                                                                                                                                                                                                                                                                                                                                                                                                                                 | Topics                                                                                                                                                                                                                                                                                                                                               | Duration      | Teaching methods                                                                                                  |
|-----------------------|---------------------------------------------------------------------------------------------------------------------------------------------------------------------------------------------------------------------------------------------------------------------------------------------------------------------------------------------------------------------------------------------------------------------------------------------------------------------------------------------------------------------------------------------------------------------|------------------------------------------------------------------------------------------------------------------------------------------------------------------------------------------------------------------------------------------------------------------------------------------------------------------------------------------------------|---------------|-------------------------------------------------------------------------------------------------------------------|
| Session 1<br>(Week 1) | <p>Goal: The goal of this session is to provide information about fatigue in kidney failure and, its causes, and energy conservation, strategies and its application in activities of daily livings.</p> <p>Objectives</p> <ul style="list-style-type: none"> <li>• To set a friendly environment and develop a trusting interpersonal relationship</li> <li>• To give information about fatigue, its causes</li> <li>• To give information about energy conservation, energy conservation strategy 1 and its application in activities of daily livings</li> </ul> | <ul style="list-style-type: none"> <li>• Fatigue in kidney failure</li> <li>• Causes of fatigue.</li> <li>• Introduction of energy conservation</li> <li>• Energy conservation strategies and its application in activities of daily livings</li> <li>✓ Strategy 1: Organising daily routine and evaluating priorities</li> <li>• Summary</li> </ul> | 30-45 minutes | <p>A face-face session with the help of PowerPoint on the laptop</p> <p>Question and answer</p> <p>Discussion</p> |
| Session 2<br>(Week 3) | <p>Goal: The goal of this session is to provide information about energy conservation strategies two, three, four and five and its application in activities of daily living</p> <p>Objectives</p>                                                                                                                                                                                                                                                                                                                                                                  | <ul style="list-style-type: none"> <li>• Revision of previous session.</li> <li>• Energy conservation strategies and its application in activities of daily livings</li> <li>✓ Strategy 2: Simplifying the everyday task</li> </ul>                                                                                                                  | 30 minutes    | <p>A face-face session with the help of PowerPoint on the laptop</p>                                              |

|                               |                                                                                                                                                                                                                                                                                                                                                                                                                                                                                    |                                                                                                                                                                                                                                                                                                                              |                   |                                                                                                                   |
|-------------------------------|------------------------------------------------------------------------------------------------------------------------------------------------------------------------------------------------------------------------------------------------------------------------------------------------------------------------------------------------------------------------------------------------------------------------------------------------------------------------------------|------------------------------------------------------------------------------------------------------------------------------------------------------------------------------------------------------------------------------------------------------------------------------------------------------------------------------|-------------------|-------------------------------------------------------------------------------------------------------------------|
|                               | <ul style="list-style-type: none"> <li>• To set a friendly environment and prepare participant for educational session.</li> <li>• To revise the content of session one.</li> <li>• To provide opportunity to ask question about previous session.</li> <li>• To give information about energy conservation 2,3,4, 5 and its application in activities of daily living</li> </ul>                                                                                                  | <ul style="list-style-type: none"> <li>✓ Strategy 3: Organising station for activities and using the energy-efficient appliances</li> <li>✓ Strategy 4: Pacing activities and avoid rushing</li> <li>✓ Strategy 5: The value of rest and having rest periods during the day</li> <li>• Summary</li> </ul>                    |                   | <p>Question and answer</p> <p>Discussion</p>                                                                      |
| <p>Session 3<br/>(Week 5)</p> | <p>Goal: The goal of this session is to provide information about energy conservation strategies 6,7 and its application in activities of daily living</p> <p>Objectives</p> <ul style="list-style-type: none"> <li>• To set a friendly environment and prepare participant for educational session</li> <li>• To revise session two</li> <li>• To identify any concern about previous session</li> <li>• To provide opportunity to ask question about previous session</li> </ul> | <ul style="list-style-type: none"> <li>• Revision of previous session</li> <li>• Energy conservation strategies and its application in activities of daily living</li> <li>✓ Strategy 6: Communicating personal needs to others</li> <li>✓ Strategy 7: Using proper body mechanics and posture</li> <li>• Summary</li> </ul> | <p>30 minutes</p> | <p>A face-face session with the help of PowerPoint on the laptop</p> <p>Question and answer</p> <p>Discussion</p> |

|                                                        |                                                                                                                                                                                                                                                                                                                                                                                                                                                              |                                                                                                                                                                                                                                     |               |                                                                                                  |
|--------------------------------------------------------|--------------------------------------------------------------------------------------------------------------------------------------------------------------------------------------------------------------------------------------------------------------------------------------------------------------------------------------------------------------------------------------------------------------------------------------------------------------|-------------------------------------------------------------------------------------------------------------------------------------------------------------------------------------------------------------------------------------|---------------|--------------------------------------------------------------------------------------------------|
|                                                        | <ul style="list-style-type: none"> <li>To give information about energy conservation six, seven and its application in activities of daily livings.</li> </ul>                                                                                                                                                                                                                                                                                               |                                                                                                                                                                                                                                     |               |                                                                                                  |
| <p>Session 4<br/>Booster<br/>session<br/>(Week 10)</p> | <p>Goal: The goal of this session is to revise the content of all session with the help of educational booklet.</p> <p>Objectives</p> <ul style="list-style-type: none"> <li>To set a friendly environment and prepare participant for educational session</li> <li>To provide opportunity to ask question about previous session</li> <li>To revise session 1, 2 and 3</li> <li>To reflect on progress in meeting the objectives of each session</li> </ul> | <ul style="list-style-type: none"> <li>Revision of previous session</li> <li>Summarise the content of the booklet</li> <li>✓ Fatigue, energy conservation, its strategies and application in activities of daily livings</li> </ul> | 30-45 minutes | <p>A face-face session with the help of booklet</p> <p>Question and answer</p> <p>Discussion</p> |

For peer review only

1  
2  
3  
4  
5  
6  
7  
8  
9  
10  
11  
12  
13  
14  
15  
16  
17  
18  
19  
20  
21  
22  
23  
24  
25  
26  
27  
28  
29  
30  
31  
32  
33  
34  
35  
36  
37  
38  
39  
40  
41  
42  
43  
44  
45  
46

1  
2  
3 The EVEREST intervention will be guided by Symptom management theory (SMT) as the  
4 theoretical framework. This theory accounts for the person, health/illness, the environment,  
5 and includes the symptom experience, symptom management strategies and  
6 outcomes.<sup>41</sup> Symptom management theory is built on the premise that a symptom experience  
7 is based on how an individual perceives and responds to the symptom.<sup>42</sup> Symptom  
8 management strategies used by individuals to delay a negative outcome of the symptom  
9 experience can be targeted by appropriate intervention strategies. The theory also explains that  
10 outcomes (e.g., functional status, self-care, HRQoL) may be altered by the symptom  
11 experience and/or symptom management strategies. The dynamic interaction between each  
12 dimension of SMT provides explicit and testable relationships among these dimensions. In  
13 this study, the relationship between a person's fatigue experience and other renal symptoms,  
14 the EVEREST intervention, and outcomes including status of fatigue and other renal  
15 symptoms, HRQoL, and occupational performance will be tested using this theory.  
16  
17  
18  
19  
20  
21  
22  
23  
24  
25  
26  
27  
28  
29  
30  
31  
32  
33  
34

### 35 *Face-to-face education session*

36  
37 Four face-to-face educational sessions will be undertaken during participants' regular HD  
38 treatment. Sessions will be in weeks 1, 3, and 5, followed by a booster session in week 10.  
39 Each session will be 30-45 minutes in duration. Research assistants (RAs; nurses trained by  
40 the principal researcher) will deliver the entire intervention to avoid information bias. Recorded  
41 PowerPoint presentation with simple language will be displayed on a laptop. At the end of each  
42 session, RAs will identify the date of next session and inform the participants. This small  
43 strategy will promote participant retention in the study.  
44  
45  
46  
47  
48  
49  
50  
51  
52

### 53 *Educational booklet*

54 Educational sessions will be supplemented by a booklet designed to be understood by an  
55 individual with minimal literacy to give a better understanding of fatigue in kidney failure,  
56 causes of fatigue, energy conservation strategies and their application in activities of daily  
57  
58  
59  
60

1  
2  
3 living. Simple text information, along with informative images, will be used to assist  
4  
5 participants to understand and apply the energy conservation strategies.  
6  
7  
8  
9

### 10 ***Control group***

11  
12 Participants randomised to the control group will receive usual care (standard care with no  
13  
14 formalised, structured, or tailored interventions to reduce symptom/s) from their healthcare  
15  
16 providers. Participants in the control group will receive an EVEREST booklet once the study  
17  
18 is completed.  
19  
20  
21  
22  
23

### 24 **Outcomes**

#### 25 **Primary outcome**

##### 26 *Fatigue*

27  
28 The primary outcome of the study is fatigue, which is measured at Time 0 = baseline, Time 1  
29  
30 = week 4, Time 2 = week 8 and Time 3 = week 12 using the Fatigue Symptom Inventory (FSI)  
31  
32 <sup>43</sup>. This self-report instrument is comprised of 14 items assessing the frequency, severity, daily  
33  
34 pattern of fatigue and its perceived interference with quality of life. Fatigue severity is  
35  
36 measured by an 11 - point item scale (0 = not at all fatigue, 10 = as fatigued as I could be) that  
37  
38 assesses least, average, and most fatigue in the past week and right now. A composite fatigue  
39  
40 score (FSI composite) will be derived by calculating the average across the three severity items.  
41  
42 Frequency is measured as the number of days in the past week (0 - 7) that participants felt  
43  
44 fatigue, as well as the percentage of each day on average they felt fatigued (0% = none of the  
45  
46 day; 100% = the entire day). Perceived interference, which assesses the degree to which  
47  
48 fatigue in the past week was judged to interfere with the general level of activity, ability to  
49  
50 bathe and dress, normal work activity, ability to concentrate, relations with others, enjoyment  
51  
52 of life, and mood, is measured on separate 11-point scales (0 = no interference; 10 = extreme  
53  
54 interference). These interference ratings can be summed (and averaged) to obtain a total  
55  
56  
57  
58  
59  
60

1  
2  
3 perceived interference score. The final item provides qualitative information about possible  
4 diurnal variation in the daily experience of fatigue. The FSI has been used previously in the  
5 study population of patients with kidney failure.<sup>44</sup> This instrument was translated into the  
6 Nepali language, and has a Cronbach's alpha was 0.79.<sup>45</sup>  
7  
8  
9  
10  
11  
12  
13  
14

### 15 **Secondary outcomes**

16 Secondary outcomes are other renal symptoms, occupational performance, and HRQoL,  
17 which will be measured at Time 0 (Baseline) and Time 1 (Week 12).  
18  
19  
20  
21  
22  
23

#### 24 *Other renal symptoms*

25  
26 Other renal symptoms will be measured using the Integrated Patient Outcome Scale Renal  
27 (IPOS-Renal); this is a short 11-item measure which combines the most common symptoms  
28 experienced by people with kidney disease; additional items such as information needs,  
29 practice issues; and anxiety of family.<sup>46, 47</sup> Question 2 of this instrument addresses 15 specific  
30 symptoms for each of these items, with responses rated 0 (no symptoms) – 4 (overwhelmingly)  
31  
32  
33  
34  
35  
36  
37  
38  
39  
40  
41  
42  
43  
44  
45  
46  
47  
48  
49  
50  
51  
52  
53  
54  
55  
56  
57  
58  
59  
60  
The overall IPOS-renal score can range from 0 to 92. The IPOS-Renal demonstrates good  
reliability and validity;<sup>49</sup> however, it is not yet available in the Nepali language. This instrument  
was translated into Nepali in the initial phase of this study. Translation process recommended  
by Sousa and Rojjanasrirat<sup>50</sup> was used to translate the instrument in English to the Nepali  
language. A content validity index will be calculated while reliability of the instrument will be  
tested in a representative sample of HD participants in this study.

#### *Occupational performance*



1  
2  
3 The occupational performance will be measured using the Nepali version of the Canadian  
4 occupational performance measure (COPM).<sup>51</sup> It is designed to identify changes in  
5 occupational performance over a period. Administration of COPM requires five steps. First,  
6 the individual identifies and prioritises everyday issues that restrict or impact the performance  
7 within the area of self-care, productivity, and leisure. Second, the individual has to rate the  
8 identified problem in terms of their importance on a scale of (not important at all) to 10  
9 (extremely important). Third, the individual chose the five most urgent or important problem  
10 on which to focus during the intervention. Fourth, the individual rates their performance and  
11 satisfaction. Both scales range from 1-10, with higher values indicating better performance and  
12 greater satisfaction. After an appropriate interval, performance and satisfaction with  
13 performance are reassessed and calculated to measure changes in the individual's perceived  
14 occupational performance throughout an intervention. Cronbach's alpha of this instrument for  
15 performance score was 0.89, and for the satisfaction, the score was 0.88.<sup>52</sup>  
16  
17  
18  
19  
20  
21  
22  
23  
24  
25  
26  
27  
28  
29  
30  
31  
32  
33  
34

### 35 *Health-related quality of life*

36  
37 Health-related quality of life will be measured using the Nepali version of the SF-36  
38 questionnaire.<sup>53</sup> The SF-36 contains 36 multidimensional questions and has eight sub-scales:  
39 physical functioning (PF), role physical (RP), bodily pain (BP), role emotional (RE), vitality  
40 (VT), general health (GH), social functioning (SF), and mental health (MH).<sup>54</sup> There are two  
41 distinct concepts measured by the SF-36, represented by the physical component summary  
42 (PCS) and mental component summary (MCS).<sup>54</sup> For each sub-scale, items are scored using a  
43 Likert scale, summed and transformed on to a scale from 0 (worst health) to 100 (best health).<sup>54</sup>  
44  
45  
46  
47  
48  
49  
50  
51  
52  
53  
54 This instrument had adequate reliability with Cronbach's alpha of 0.85.<sup>53</sup>  
55  
56  
57  
58  
59  
60

### Additional measurements

Demographic and clinical information, except the blood test report, will be collected at baseline only. The demographic tool has been designed to collect information about participants age, gender, residence, marital status, ethnicity, type of family, educational status, occupation, duration of HD, family history of CKD, access to HD centre. Clinical information such as past medical and surgical history, cause of kidney failure, details of HD, medication prescription will be accumulated from hospital records, patient's records, and blood test report. In addition, eGFR, serum creatinine levels, serum albumin levels, blood urea nitrogen, electrolytes, iron studies and haemoglobin levels will be extracted from the individual's reports. The blood test report will be collected at week 4,8 and 12, which will be aligned with the fatigue assessment. Table 2 illustrates the timeline for measurement of outcome and intervention session.

**Table 2: Timeline for outcome measurement and intervention sessions**

| Time point (Week)              | 1   | 2 | 3   | 4 | 5   | 6 | 7 | 8 | 9 | 10 | 11 | 12 |
|--------------------------------|-----|---|-----|---|-----|---|---|---|---|----|----|----|
| <b>Enrolment</b>               |     |   |     |   |     |   |   |   |   |    |    |    |
| Eligibility                    | ×   |   |     |   |     |   |   |   |   |    |    |    |
| Informed consent               | ×   |   |     |   |     |   |   |   |   |    |    |    |
| Allocation                     | ×   |   |     |   |     |   |   |   |   |    |    |    |
| <b>Demographic Information</b> |     |   |     |   |     |   |   |   |   |    |    |    |
| Demographic Information        | ×   |   |     |   |     |   |   |   |   |    |    |    |
| Clinical Information           | ×   |   |     |   |     |   |   |   |   |    |    |    |
| Blood test report              | ×   |   |     | × |     |   |   | × |   |    |    | ×  |
| Fatigue                        | ×   |   |     | × |     |   |   | × |   |    |    | ×  |
| Other renal symptoms           | ×   |   |     |   |     |   |   |   |   |    |    | ×  |
| Occupational performance       | ×   |   |     |   |     |   |   |   |   |    |    | ×  |
| HRQoL                          | ×   |   |     |   |     |   |   |   |   |    |    | ×  |
| <b>Intervention</b>            |     |   |     |   |     |   |   |   |   |    |    |    |
| Intervention: EVEREST          | ES1 |   | ES2 |   | ES3 |   |   |   |   | B  |    |    |
| Control: Usual care            | ×   | × | ×   | × | ×   | × | × | × | × | ×  | ×  | ×  |

¶ ES1: Educational session 1; ES2: Educational session 2; ES3: Educational session 3; B: Booster session

### **Randomisation**

In this cluster randomised study, the unit of observation is at the level of the individual, and the unit of randomisation is at the level of dialysis day (cluster). Cluster randomisation will be done according to the HD day (Sunday/Tuesday/ Thursday or Monday/ Wednesday/ Friday). This method of randomisation will avoid possible treatment contamination. Instances of participants attending different dialysis day and being potentially exposed to the intervention will be documented. An equal number of participants will be recruited from each shift to ensure both intervention and control groups have an equal number. Randomisation will be used and documented by an independent person, not directly involved in the study.

### **Recruitment and data collection**

The researcher will liaise with the dialysis nurse and medical doctor to identify eligible potential participants. A dialysis nurse who is taking care of the participant will seek approval from the participant and will ask if the member of the research team can introduce the study to them. Following confirmation, the research assistants (RAs) will approach potential participants to introduce herself, the purpose, and methods of the study. The RAs will then assess all inclusion/exclusion criteria and invite them to participate. Potential participants will be then given an opportunity to ask if any queries about the study and read the participants information sheet before giving written consent. After written consent, participants will then be invited to complete the self-reported instruments using the Redcap mobile application. Recruitment of the participants will occur until the required sample size is achieved. Training will be given to research assistants before data collection regarding all the procedure and administration of instruments.

## Blinding

Blinding is an important aspect to minimise the bias in the study, where participants, data collector, investigators or healthcare providers remain unaware of the allocated intervention. It reduces the opportunity for clinicians or researchers to be influenced by knowledge of group allocation.<sup>55</sup> Due to the nature of the intervention and its pragmatic design, it will not be possible to blind the participants, researcher, dialysis nurse and nephrologist. However, to minimise the risk of bias, research assistant who will collect follow up data will be blinded to group allocation. Nephrologist and dialysis nurses who are responsible for caring for dialysis patients will not be involved in allocation, delivery of the intervention or data collection. They may be aware of the allocation, but this will not affect the outcome of the study.

## Data management

All collected data will be managed using an online research data management planning tool. Personal information will be anonymised by allocating an identification number for each participant. Paperwork, including questionnaires and consent forms, will be kept in a locked filing cabinet. Electronic data will be stored in the secure research storage service managed by the university. The stored data will be accessible only for the research team members. All identifiable information received from participants will be replaced with a unique code. A unique code that links identifying information will be stored separately in an electronic database only accessible by authorised members of the research team. Information used in the analyses will remain in the de-identified format, and other identifying information will not be disclosed in the document or any research publication. All the collected data will be retained for at least 15 years after the end of the study. After the 15 years of research data at the institution will be permanently deleted from the computer system, and any hard copies will be destroyed.

## Data analysis

First, a coding manual for each outcome measurement variable will be developed. Responses obtained from the participants on the outcome measures will be scored prior to entering the IBM SPSS statistics software. After data entry, data will be cleaned and checked by the researcher to evaluate for missing data, any errors and invalid response code. Descriptive statistics will be used for all study variables. Baseline characteristics will be compared for the control and intervention group using independent *t*-test or Mann Whitney *U* tests for continuous variables while Chi-square or Fisher Exact tests for categorical variables. The differences between intervention and control groups in terms of changes in primary and secondary outcome variables will be analysed using generalised linear mixed model according to intention-to-treat principle. The model will be used to evaluate the effect of an intervention in different time point and the group-by-time interaction. This model is designed to adjust the clustered nature of the data and include all randomised participants in the analysis. For continuous variables, when the normality assumptions are not met, data will be transformed using log transformation to normalise the residual. Effectiveness of intervention will be reported using mean differences with 95% confidence intervals. Significance will be set at  $p < 0.05$ .

## Ethics and dissemination

Ethical approval is obtained from the Human Research Committee of the university and Ethical Review Board of Nepal Health Research Council prior to the commencement of the study. Appropriate approval is also sought from the research site. Informed written consent will be obtained from each participant before study commencement. Participants will be informed about voluntary participation and that there is no foreseeable risk or harm in participating in the study. Participants will be assured that their confidentiality will always be maintained. Participants also have the liberty to discontinue participating in the study without any

1  
2  
3 clarification. All personal data will be deidentified before analysis and reported collectively.  
4  
5 The trial has been accepted by and registered in ClinicalTrials.gov (Trial registration  
6  
7 ID NCT04360408) on April 23, 2020.  
8  
9  
10

11  
12 The results of this research will be published and presented in a variety of forums. Manuscripts  
13  
14 will be submitted to peer-reviewed journals and conference presentation will be prepared for  
15  
16 both national and international conferences.  
17  
18  
19

## 20 21 22 **Discussion**

23  
24 There is growing evidence of a direct relationship between symptom burden and HRQoL in  
25  
26 individuals with kidney failure;<sup>56-58</sup> however, the evidence to inform practice about improving  
27  
28 HRQoL by targeting one or more symptoms is not apparent. Similarly, energy conservation  
29  
30 management improves the ability of the participants to manage their fatigue by promoting the  
31  
32 optimal use of available energy and thereby reducing the impact and severity of fatigue. This  
33  
34 study is needed as it will provide empirical evidence about the effectiveness of an education  
35  
36 regarding energy conservation for fatigue management that can be integrated into the everyday  
37  
38 life of people receiving HD.  
39  
40  
41  
42  
43  
44  
45

46 Major limitation of this study includes the recruitment of participants from one dialysis centre  
47  
48 in Nepal. This limitation is somewhat mitigated because the selected setting is one of the largest  
49  
50 dialysis centres with people from across Nepal referred for HD services. The population of the  
51  
52 study is limited to the people receiving HD, which limits the generalizability of the finding to  
53  
54 people receiving conservative treatment and other forms of KRT. This study will also use  
55  
56 patient-reported outcome measure for the symptom, HRQoL and occupational performance;  
57  
58 thus, it is difficult to identify whether participants will accurately report change in the  
59  
60

1  
2  
3 measurement over time. Moreover, participants in this study will not be followed up for a long  
4  
5 period after the intervention.  
6  
7  
8  
9

10 In conclusion, this study will evaluate the effectiveness of energy conservation education  
11 interventions to reduce fatigue in people with kidney failure receiving HD. The evidence  
12 generated from this study is expected to positively influence patient outcomes by assessing  
13 symptoms and providing appropriate educational interventions during the HD session.  
14  
15  
16  
17  
18  
19  
20  
21  
22  
23  
24  
25  
26  
27  
28  
29  
30  
31  
32  
33  
34  
35  
36  
37  
38  
39  
40  
41  
42  
43  
44  
45  
46  
47  
48  
49  
50  
51  
52  
53  
54  
55  
56  
57  
58  
59  
60

For peer review only

## References

1. Jha V. Current status of end-stage renal disease care in India and Pakistan. *Kidney Int Suppl* 2013;**3**(2):157-160. [doi: 10.1038/kisup.2013.3](https://doi.org/10.1038/kisup.2013.3)
2. Hill NR, Fatoba ST, Oke JL, Hirst JA, O'Callaghan CA, Lasserson DS, et al. Global Prevalence of Chronic Kidney Disease – A Systematic Review and Meta-Analysis. *PLoS One* 2016;**11**(7):e0158765. [doi: 10.1371/journal.pone.0158765](https://doi.org/10.1371/journal.pone.0158765)
3. Webster AC, Nagler EV, Morton RL, Masson P. Chronic Kidney Disease. *The Lancet* 2017;**389**(10075):1238-1252. [doi:10.1016/S0140-6736\(16\)32064-5](https://doi.org/10.1016/S0140-6736(16)32064-5)
4. Levey AS, Eckardt K-U, Dorman NM, Christiansen SL, Hoorn EJ, Ingelfinger JR, et al. Nomenclature for kidney function and disease: report of a kidney disease: improving global outcomes (KDIGO) consensus conference. *Kidney Int* 2020;**97**(6):1117-1129.
5. Mcgee J, Pandey B, Maskey A, Frazer T, Mackinney T. Free dialysis in Nepal: Logistical challenges explored. *Hemodial Int* 2018;**22**(3):283-289. [doi:10.1111/hdi.12629](https://doi.org/10.1111/hdi.12629)
6. Hwang HS, Hong YA, Yoon HE, Chang YK, Kim SY, Kim YO, et al. Comparison of Clinical Outcome Between Twice-Weekly and Thrice-Weekly Hemodialysis in Patients With Residual Kidney Function. *Medicine* 2016;**95**(7):e2767. [doi:10.1097/md.0000000000002767](https://doi.org/10.1097/md.0000000000002767)
7. Sinclair A, Cimon K, Loncar M, Sood M, Komenda P, Severn M, et al. CADTH Optimal Use Reports. Dialysis Modalities for the Treatment of End-Stage Kidney Disease: A Health Technology Assessment. Ottawa (ON): Canadian Agency for Drugs and Technologies in Health.; 2017.
8. Wan EYF, Chen JY, Choi EPH, Wong CKH, Chan AKC, Chan KHY, et al. Patterns of health-related quality of life and associated factors in Chinese patients undergoing



- 1  
2  
3 haemodialysis. *Health Qual of Life Outcomes* 2015;**13**(1):108. [doi:10.1016/S0140-6736\(16\)32064-5](https://doi.org/10.1016/S0140-6736(16)32064-5)
- 4  
5  
6  
7  
8 9. Meek KP, Bergeron CD, Towne SD, Ahn S, Ory MG, Smith ML. Restricted Social  
9  
10 Engagement among Adults Living with Chronic Conditions. *Int J Env Res Pub He*  
11  
12 2018;**15**(1):158. [doi:10.3390/ijerph15010158](https://doi.org/10.3390/ijerph15010158)
- 13  
14  
15 10. Gerogianni SK, Babatsikou FP. Social Aspects of Chronic Renal Failure in Patients  
16  
17 Undergoing Haemodialysis. *Int J Caring Sci* 2014;**7**(3):740-745.
- 18  
19  
20 11. Hui L, Ya-fang J, Chiu-Chu L. Factors associated with self-management by people  
21  
22 undergoing hemodialysis: A descriptive study. *Int J Nurs Stud* 2014;**51**(2):208-216.  
23  
24 [doi: 10.1016/j.ijnurstu.2013.05.012](https://doi.org/10.1016/j.ijnurstu.2013.05.012)
- 25  
26  
27 12. Moskovitch JT, Mount PF, Davies MRP. Changes in Symptom Burden in Dialysis  
28  
29 Patients Assessed Using a Symptom-Reporting Questionnaire in Clinic. *J Palliat Care*  
30  
31 2020;**35**(1):59-65. [doi:10.1177/0825859719827315](https://doi.org/10.1177/0825859719827315)
- 32  
33  
34 13. Almutary H, Bonner A, Douglas C. Which patients with chronic kidney disease have  
35  
36 the greatest symptom burden? A Comparative study of advanced CKD stage and  
37  
38 dialysis modality. *J Ren Care* 2016;**42**(2):73-82. [doi:10.1111/jorc.12152](https://doi.org/10.1111/jorc.12152)
- 39  
40  
41 14. Bossola M, Pepe G, Picca A, Calvani R, Marzetti E. Treating symptoms to improve the  
42  
43 quality of life in patients on chronic hemodialysis. *Int Urol Nephrol* 2019;**51**(5):885-  
44  
45 887. [doi:10.1007/s11255-019-02121-5](https://doi.org/10.1007/s11255-019-02121-5)
- 46  
47  
48 15. Almutary H, Bonner A, Douglas C. Symptom burden in chronic kidney disease: a  
49  
50 review of recent literature. *J Ren Care* 2013;**39**(3):140-150. [doi:10.1111/j.1755-6686.2013.12022.x](https://doi.org/10.1111/j.1755-6686.2013.12022.x)
- 51  
52  
53  
54 16. Dąbrowska-Bender M, Dykowska G, Żuk W, Milewska M, Staniszevska A. The  
55  
56 impact on quality of life of dialysis patients with renal insufficiency. *Patient Prefer*  
57  
58 *Adherence* 2018;**12**:577-583. [doi:10.2147/PPA.S156356](https://doi.org/10.2147/PPA.S156356)
- 59  
60

17. Hornsby BWY, Naylor G, Bess FH. A Taxonomy of Fatigue Concepts and Their Relation to Hearing Loss. *Ear Hear* 2016;**37** (Suppl 1):136S-144S.  
[doi:10.1097/AUD.0000000000000289](https://doi.org/10.1097/AUD.0000000000000289)
18. Bossola M, Vulpio C, Tazza L. Fatigue in Chronic Dialysis Patients. *Semin Dial* 2011;**24**(5):550-555. [doi:10.1007/s11255-019-02121-5](https://doi.org/10.1007/s11255-019-02121-5)
19. Zalai D, Bohra M. Fatigue in chronic kidney disease: Definition, assessment and treatment. *Journal ACITN* 2016;**26**(1):39-44.
20. Kraus MA, Fluck RJ, Weinhandl ED, Kansal S, Copland M, Komenda P, et al. Intensive Hemodialysis and Health-Related Quality of Life. *Am J Kidney Dis* 2016;**68**(5):S33-S42. [doi:10.1053/j.ajkd.2016.05.023](https://doi.org/10.1053/j.ajkd.2016.05.023)
21. Picariello F, Moss-Morris R, Macdougall IC, Chilcot J. The role of psychological factors in fatigue among end-stage kidney disease patients: a critical review. *Clin Kidney J* 2016;**10**(1):79-88. [doi:10.1093/ckj/sfw113](https://doi.org/10.1093/ckj/sfw113)
22. Artom M, Moss-Morris R, Caskey F, Chilcot J. Fatigue in advanced kidney disease. *Kidney Int* 2014;**86**(3):497-505. [doi:10.1038/ki.2014.86](https://doi.org/10.1038/ki.2014.86)
23. Bonner A, Wellard S, Caltabiano M. The impact of fatigue on daily activity in people with chronic kidney disease. *J Clin Nurs* 2010;**19**(21-22):3006-3015.  
[doi:10.1111/j.1365-2702.2010.03381.x](https://doi.org/10.1111/j.1365-2702.2010.03381.x)
24. Bonner A, Wellard S, Caltabiano M. Levels of fatigue in people with ESRD living in far North Queensland. *J Clin Nurs* 2008;**17**(1):90-98. [doi:10.1111/j.1365-2702.2007.02042.x](https://doi.org/10.1111/j.1365-2702.2007.02042.x)
25. Horigan AE. Fatigue in Hemodialysis Patients: A Review of Current Knowledge. *J Pain Symptom Manage* 2012;**44**(5):715-724. [doi:10.1016/j.jpainsymman.2011.10.015](https://doi.org/10.1016/j.jpainsymman.2011.10.015)
26. Horigan AE, Schneider SM, Docherty S, Barroso J. The experience and self-management of fatigue in patients on hemodialysis. *Nephrol Nurs J* 2013;**40**(2):113-122.

- 1  
2  
3  
4  
5  
6  
7  
8  
9  
10  
11  
12  
13  
14  
15  
16  
17  
18  
19  
20  
21  
22  
23  
24  
25  
26  
27  
28  
29  
30  
31  
32  
33  
34  
35  
36  
37  
38  
39  
40  
41  
42  
43  
44  
45  
46  
47  
48  
49  
50  
51  
52  
53  
54  
55  
56  
57  
58  
59  
60
27. Johansen KL, Finkelstein FO, Revicki DA, Evans C, Wan S, Gitlin M, et al. Systematic review of the impact of erythropoiesis-stimulating agents on fatigue in dialysis patients. *Nephrol Dial Transplant* 2011;**27**(6):2418-2425. [doi:10.1093/ndt/gfr697](https://doi.org/10.1093/ndt/gfr697)
28. Bossola M, Di Stasio E, Monteburini T, Parodi E, Ippoliti F, Bonomini M, et al. Intensity, Duration, and Frequency of Post-Dialysis Fatigue in Patients on Chronic Haemodialysis. *J Ren Care*. 2020;**46**(2):115-123. [doi:10.1111/jorc.12315](https://doi.org/10.1111/jorc.12315)
29. Bennett S, Pigott A, Beller EM, Haines T, Meredith P, Delaney C. Educational interventions for the management of cancer-related fatigue in adults. *Cochrane Database Syst Rev* 2016;**11**:CD008144. [doi:10.1002/14651858.CD008144.pub2](https://doi.org/10.1002/14651858.CD008144.pub2)
30. Kao Y-H, Huang Y-C, Chen P-Y, Wang K-M. The effects of exercise education intervention on the exercise behaviour, depression, and fatigue status of chronic kidney disease patients. *Health Educ* 2012;**112**(6):472-484. [doi:10.1108/09654281211275827](https://doi.org/10.1108/09654281211275827)
31. Blikman LJ, Huisstede BM, Kooijmans H, Stam HJ, Bussmann JB, van Meeteren J. Effectiveness of Energy Conservation Treatment in Reducing Fatigue in Multiple Sclerosis: A Systematic Review and Meta-Analysis. *Arch Phys Med Rehabil* 2013;**94**(7):1360-1376. [doi:10.1016/j.apmr.2013.01.025](https://doi.org/10.1016/j.apmr.2013.01.025)
32. Sadeghi E, Gozali N, Tabrizi FM. Effects of energy conservation strategies on cancer related fatigue and health promotion lifestyle in breast cancer survivors: a randomized control trial. *Asian Pac J Cancer Prevention* 2016;**17**(10):4783-4790. [doi:10.22034/apjcp.2016.17.10.4783](https://doi.org/10.22034/apjcp.2016.17.10.4783)
33. Khozimeh FS, Navidian A, Sasanpour P, Kiani F. The Effect of Training on Energy Conservation Strategies, Fatigue, and Self-Caring among Women with Breast Cancer Undergoing Chemotherapy in Zahedan Medical Sciences Hospitals in 2018-2019. *J. Evol. Med. Dent. Sci* 2019;**8**(49):3661-3667.

- 1  
2  
3  
4  
5  
6  
7  
8  
9  
10  
11  
12  
13  
14  
15  
16  
17  
18  
19  
20  
21  
22  
23  
24  
25  
26  
27  
28  
29  
30  
31  
32  
33  
34  
35  
36  
37  
38  
39  
40  
41  
42  
43  
44  
45  
46  
47  
48  
49  
50  
51  
52  
53  
54  
55  
56  
57  
58  
59  
60
34. Finlayson M, Preissner K, Cho C, Plow M. Randomized trial of a teleconference-delivered fatigue management program for people with multiple sclerosis. *Mult Scler* 2011;**17**(9):1130-1140. [doi:10.1177/1352458511404272](https://doi.org/10.1177/1352458511404272)
  35. Mathiowetz VG, Finlayson ML, Matuska KM, Chen HY, Luo P. Randomized controlled trial of an energy conservation course for persons with multiple sclerosis. *Mult Scler* 2005;**11**(5):592-601. [doi:10.1191/1352458505ms1198oa](https://doi.org/10.1191/1352458505ms1198oa)
  36. Sharma S, Green T, Alexander KE, Bonner A. Educational or behavioural interventions for symptoms and health-related quality of life in adults receiving haemodialysis: A systematic review. *J Ren Care* 2020;**46**(4):233-249. [doi:10.1111/jorc.12329](https://doi.org/10.1111/jorc.12329)
  37. Yoong SL, Wolfenden L, Clinton-McHarg T, Waters E, Pettman TL, Steele E, et al. Exploring the pragmatic and explanatory study design on outcomes of systematic reviews of public health interventions: a case study on obesity prevention trials. *J Public Health*. 2014;**36**(1):170-176. [doi:10.1093/pubmed/fdu006](https://doi.org/10.1093/pubmed/fdu006)
  38. Blikman LJ, van Meeteren J, Twisk JW, de Laat FA, de Groot V, Beckerman H, et al. Effectiveness of energy conservation management on fatigue and participation in multiple sclerosis: A randomized controlled trial. *Mult Scler J* 2017;**23**(11):1527-1541.
  39. Packer TL, Brink N, Sauriol A. Managing fatigue : a six-week course for energy conservation. Brink N, Sauriol A, editors. Tucson, Ariz: Therapy Skill Builders; 1995.
  40. Humphreys J, Janson S, Donesky DA, Dracup K, Lee KA, Puntillo K, et al. Theory of symptom management. Middle range theory for nursing, 3rd ed. New York, NY, US: Springer Publishing Company; 2014. p. 141-164.
  41. Larson PJ, Carrieri-Kohlman V, Dodd MJ, Douglas M, Faucett J, Froelicher ES, et al. A Model for Symptom Management. *J Nurs Scholarsh* 1994;**26**(4):272-276. [doi:10.1111/j.1547-5069.1994.tb00333.x](https://doi.org/10.1111/j.1547-5069.1994.tb00333.x)

- 1  
2  
3  
4  
5  
6  
7  
8  
9  
10  
11  
12  
13  
14  
15  
16  
17  
18  
19  
20  
21  
22  
23  
24  
25  
26  
27  
28  
29  
30  
31  
32  
33  
34  
35  
36  
37  
38  
39  
40  
41  
42  
43  
44  
45  
46  
47  
48  
49  
50  
51  
52  
53  
54  
55  
56  
57  
58  
59  
60
42. Hann DM, Jacobsen PB, Azzarello LM, Martin SC, Curran SL, Fields KK, et al. Measurement of fatigue in cancer patients: development and validation of the Fatigue Symptom Inventory. *Qual Life Res* 1998;7(4):301-310. [doi:10.1023/a:1024929829627](https://doi.org/10.1023/a:1024929829627)
43. Ju A, Unruh ML, Davison SN, Dapuelto J, Dew MA, Fluck R, et al. Patient-reported outcome measures for fatigue in patients on hemodialysis: a systematic review. *Am J Kidney Dis* 2018;71(3):327-343.
44. Dahal A, Mehta RK. Fatigue experience and coping strategies among cancer patients receiving chemotherapy. *Nepal Health Res Counc* 2018;16(3):285-290. [doi:10.3126/jnhrc.v16i3.21425](https://doi.org/10.3126/jnhrc.v16i3.21425)
45. Murphy EL, Murtagh FE, Carey I, Sheerin NS. Understanding symptoms in patients with advanced chronic kidney disease managed without dialysis: use of a short patient-completed assessment tool. *Nephron Clinical Practice* 2009;111(1):c74-c80.
46. Cicely Saunders Institute. Palliative care outcome scale-IPOS-Renal: Cicely Saunders Institute; 2016.<https://pos-pal.org/maix/ipos-renal-in-english.php>. Accessed on 4 Sep 2020
47. Cicely Saunders Institute. How to score IPOS: Cicely Saunders Institute; 2016.<https://pos-pal.org/maix/how-to-score.php>. Accessed on 4 Sep 2020
48. Raj R, Ahuja K, Frandsen M, Murtagh FE, Jose M. Validation of the IPOS-renal symptom survey in advanced kidney disease: a cross-sectional study. *J Pain Symptom Manage* 2018;56(2):281-287.
49. Sousa VD, Rojjanasrirat W. Translation, adaptation and validation of instruments or scales for use in cross-cultural health care research: a clear and user-friendly guideline. *J Eval Clin Pract* 2011;17(2):268-274. [doi:10.1111/j.1365-2753.2010.01434.x](https://doi.org/10.1111/j.1365-2753.2010.01434.x)
50. Law M, Baptiste S, McColl M, Opzoomer A, Polatajko H, Pollock N. The Canadian occupational performance measure: an outcome measure for occupational therapy. *Can.*

- 1  
2  
3  
4  
5  
6  
7  
8  
9  
10  
11  
12  
13  
14  
15  
16  
17  
18  
19  
20  
21  
22  
23  
24  
25  
26  
27  
28  
29  
30  
31  
32  
33  
34  
35  
36  
37  
38  
39  
40  
41  
42  
43  
44  
45  
46  
47  
48  
49  
50  
51  
52  
53  
54  
55  
56  
57  
58  
59  
60
- J Occup Ther* 1990;**57**(2):82-87. [doi:10.1177/000841749005700207?url\\_ver=Z39.88-2003&rft\\_id=ori:rid:crossref.org&rft\\_dat=cr\\_pub%3dpubmed](https://doi.org/10.1177/000841749005700207?url_ver=Z39.88-2003&rft_id=ori:rid:crossref.org&rft_dat=cr_pub%3dpubmed)
51. Carswell A, McColl MA, Baptiste S, Law M, Polatajko H, Pollock N. The Canadian Occupational Performance Measure: a research and clinical literature review. *J Occup Ther* 2004;**71**(4):210-222. [doi:10.1177/000841740407100406](https://doi.org/10.1177/000841740407100406)
52. Kafle-Bhandari B, Pradhan RR, Pathak R, Poudyal S, Paudyal MB, Sharma S, et al. Assessment of Validity of SF 36 Questionnaire Using Nepali Language to Determine Health-related Quality of Life in Patients with Chronic Liver Disease: A Pilot Study. *Cureus* 2018;**10**(7):e2925-e2925. [doi:10.7759/cureus.2925](https://doi.org/10.7759/cureus.2925)
53. Brazier JE, Harper R, Jones NM, Cathain A, Thomas KJ, Usherwood T, et al. Validating the SF-36 health survey questionnaire: new outcome measure for primary care. *Br Med J* 1992;**305**(6846):160. [doi:10.1136/bmj.305.6846.160](https://doi.org/10.1136/bmj.305.6846.160)
54. Vadiraja H, Rao RM, Nagarathna R, Nagendra H, Patil S, Diwakar RB, et al. Effects of yoga in managing fatigue in breast cancer patients: a randomized controlled trial. *Indian J Palliat Care* 2017;**23**(3):247. [doi:10.4103%2FIJPC.IJPC\\_95\\_17](https://doi.org/10.4103%2FIJPC.IJPC_95_17)
55. Bhide A, Shah PS, Acharya G. A simplified guide to randomized controlled trials. *Acta Obstet Gynecol Scand* 2018;**97**(4):380-387. [doi:10.1111/aogs.13309](https://doi.org/10.1111/aogs.13309)
56. Schick-Makaroff K, Molzahn AE, Kalfoss M. Symptoms, coping, and quality of life of people with chronic kidney disease. *Nephrol Nurs J* 2018;**45**(4):339-355.
57. Fukushima RLM, Menezes ALC, Inouye K, Pavarini SCI, Orlandi FdS. Quality of life and associated factors in patients with chronic kidney disease on hemodialysis. *Acta Paulista de Enfermagem* 2016;**29**(5):518-524. [doi:10.1590/1982-0194201600072](https://doi.org/10.1590/1982-0194201600072)
58. Almutary H, Douglas C, Bonner A. Towards a symptom cluster model in chronic kidney disease: A structural equation approach. *J Adv Nurs* 2017;**73**(10):2450-2461. [doi:10.1111/jan.13303](https://doi.org/10.1111/jan.13303)

## Footnotes

**Contributors:** The study was conceived by SS, KA, TG, M-LW, and AB. SS led the literature review. All authors contributed to the preparation of the proposal, critical review, and final approval of the manuscript.

**Funding statement:** This study received no specific grant from any funding agency in the public, commercial or not-for-profit sectors.

**Competing interests:** The authors declare that they have no competing interest.

**Ethics approval:** Ethical approval is obtained from Human Research Ethics Committee, Griffith University (GU Ref. No. 2021/053), the Nepal Health Research Council (Reg No. 1520).

**Provenance and peer review** Not commissioned; externally peer reviewed.

1  
2  
3  
4  
5  
6  
7  
8  
9  
10  
11  
12  
13  
14  
15  
16  
17  
18  
19  
20  
21  
22  
23  
24  
25  
26  
27  
28  
29  
30  
31  
32  
33  
34  
35  
36  
37  
38  
39  
40  
41  
42  
43  
44  
45  
46  
47  
48  
49  
50  
51  
52  
53  
54  
55  
56  
57  
58  
59  
60

For peer review only



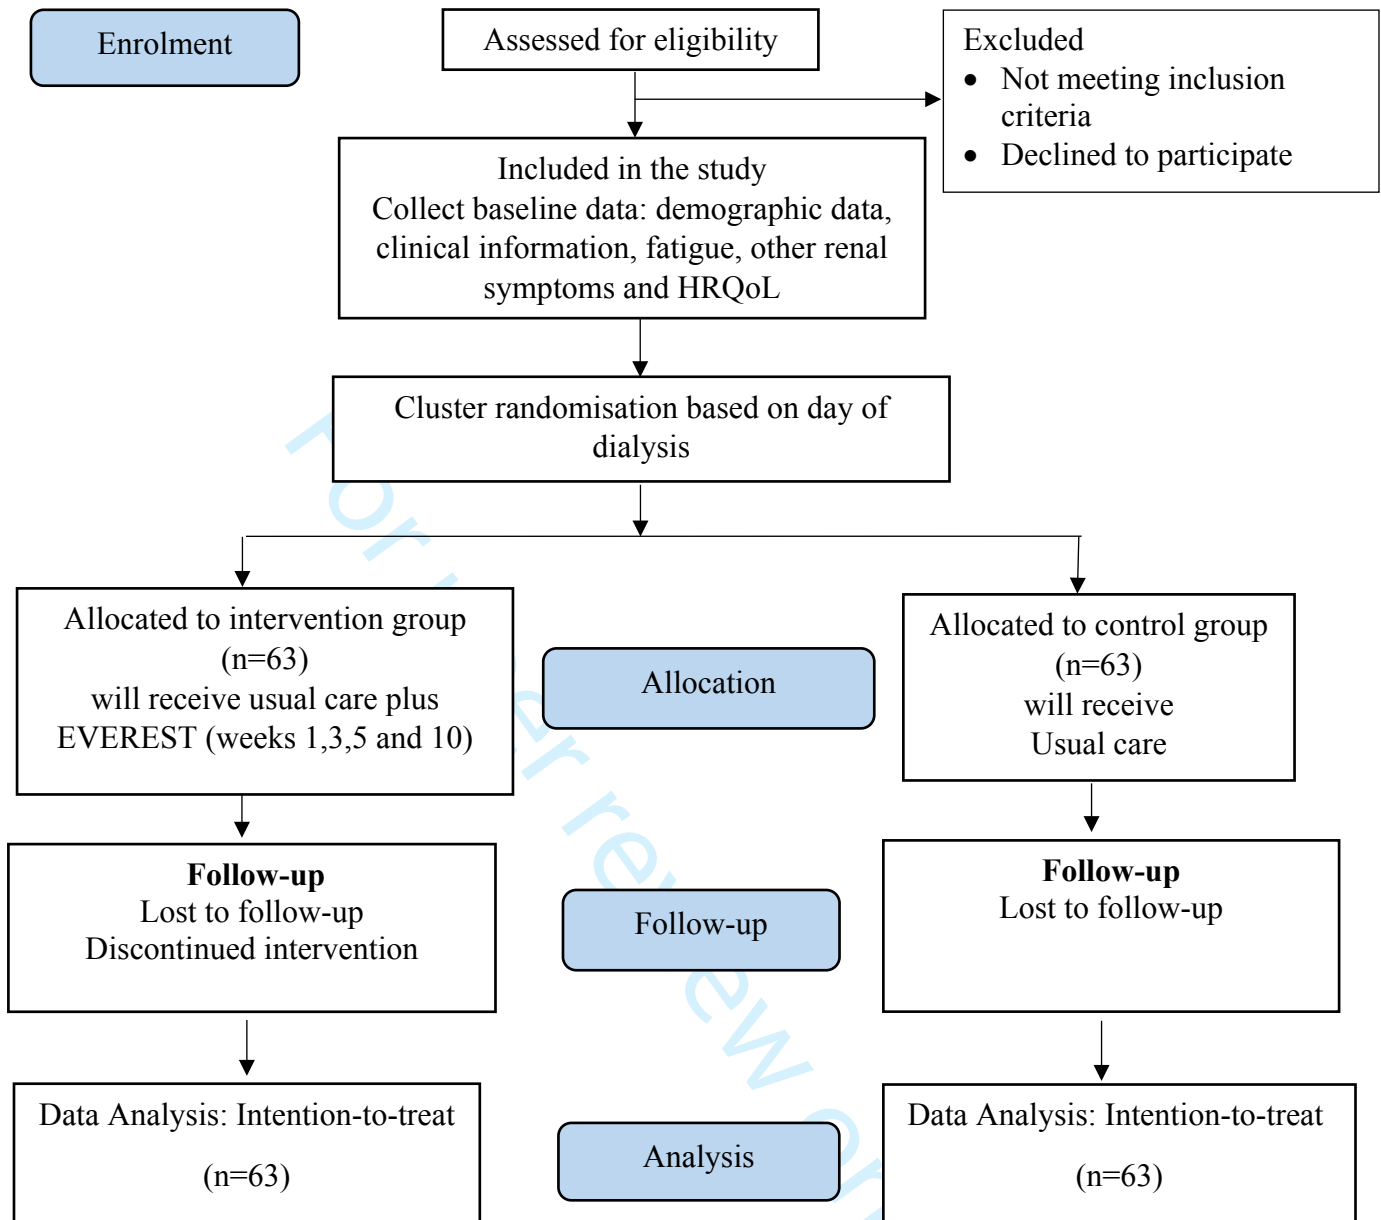

45 **Figure 1: CONSORT Flow Diagram: Extension to Cluster**

46  
47  
48  
49  
50  
51  
52  
53  
54  
55  
56  
57  
58  
59  
60

# Reporting checklist for protocol of a clinical trial.

Based on the SPIRIT guidelines.

## Instructions to authors

Complete this checklist by entering the page numbers from your manuscript where readers will find each of the items listed below.

Your article may not currently address all the items on the checklist. Please modify your text to include the missing information. If you are certain that an item does not apply, please write "n/a" and provide a short explanation.

Upload your completed checklist as an extra file when you submit to a journal.

In your methods section, say that you used the SPIRIT reporting guidelines, and cite them as:

Chan A-W, Tetzlaff JM, Gøtzsche PC, Altman DG, Mann H, Berlin J, Dickersin K, Hróbjartsson A, Schulz KF, Parulekar WR, Krleža-Jerić K, Laupacis A, Moher D. SPIRIT 2013 Explanation and Elaboration: Guidance for protocols of clinical trials. *BMJ*. 2013;346:e7586

|                                             |                     | Reporting Item                                                                                               | Page Number                              |
|---------------------------------------------|---------------------|--------------------------------------------------------------------------------------------------------------|------------------------------------------|
| <b>Administrative information</b>           |                     |                                                                                                              |                                          |
| Title                                       | <a href="#">#1</a>  | Descriptive title identifying the study design, population, interventions, and, if applicable, trial acronym | Title page; full title, page no. 1       |
| Trial registration                          | <a href="#">#2a</a> | Trial identifier and registry name. If not yet registered, name of intended registry                         | Abstract; trial registration, page no. 2 |
| Trial registration: data set                | <a href="#">#2b</a> | All items from the World Health Organization Trial Registration Data Set                                     | N/A                                      |
| Protocol version                            | <a href="#">#3</a>  | Date and version identifier                                                                                  | N/A                                      |
| Funding                                     | <a href="#">#4</a>  | Sources and types of financial, material, and other support                                                  | Page 29                                  |
| Roles and responsibilities: contributorship | <a href="#">#5a</a> | Names, affiliations, and roles of protocol contributors                                                      | Page 1 and 29                            |

|    |                           |                     |                                                                   |          |
|----|---------------------------|---------------------|-------------------------------------------------------------------|----------|
| 1  | Roles and                 | <a href="#">#5b</a> | Name and contact information for the trial sponsor                | N/A      |
| 2  | responsibilities:         |                     |                                                                   |          |
| 3  | sponsor contact           |                     |                                                                   |          |
| 4  | information               |                     |                                                                   |          |
| 5  |                           |                     |                                                                   |          |
| 6  |                           |                     |                                                                   |          |
| 7  |                           |                     |                                                                   |          |
| 8  | Roles and                 | <a href="#">#5c</a> | Role of study sponsor and funders, if any, in study design;       | N/A      |
| 9  | responsibilities:         |                     | collection, management, analysis, and interpretation of data;     |          |
| 10 | sponsor and funder        |                     | writing of the report; and the decision to submit the report for  |          |
| 11 |                           |                     | publication, including whether they will have ultimate            |          |
| 12 |                           |                     | authority over any of these activities                            |          |
| 13 |                           |                     |                                                                   |          |
| 14 |                           |                     |                                                                   |          |
| 15 |                           |                     |                                                                   |          |
| 16 | Roles and                 | <a href="#">#5d</a> | Composition, roles, and responsibilities of the coordinating      | N/A      |
| 17 | responsibilities:         |                     | centre, steering committee, endpoint adjudication committee,      |          |
| 18 | committees                |                     | data management team, and other individuals or groups             |          |
| 19 |                           |                     | overseeing the trial, if applicable (see Item 21a for data        |          |
| 20 |                           |                     | monitoring committee)                                             |          |
| 21 |                           |                     |                                                                   |          |
| 22 |                           |                     |                                                                   |          |
| 23 |                           |                     |                                                                   |          |
| 24 | <b>Introduction</b>       |                     |                                                                   |          |
| 25 |                           |                     |                                                                   |          |
| 26 |                           |                     |                                                                   |          |
| 27 | Background and            | <a href="#">#6a</a> | Description of research question and justification for            | Page 4-6 |
| 28 | rationale                 |                     | undertaking the trial, including summary of relevant studies      |          |
| 29 |                           |                     | (published and unpublished) examining benefits and harms          |          |
| 30 |                           |                     | for each intervention                                             |          |
| 31 |                           |                     |                                                                   |          |
| 32 |                           |                     |                                                                   |          |
| 33 |                           |                     |                                                                   |          |
| 34 | Background and            | <a href="#">#6b</a> | Explanation for choice of comparators                             | Page 13  |
| 35 | rationale: choice of      |                     |                                                                   |          |
| 36 | comparators               |                     |                                                                   |          |
| 37 |                           |                     |                                                                   |          |
| 38 |                           |                     |                                                                   |          |
| 39 | Objectives                | <a href="#">#7</a>  | Specific objectives or hypotheses                                 | Page 6-7 |
| 40 |                           |                     |                                                                   |          |
| 41 | Trial design              | <a href="#">#8</a>  | Description of trial design including type of trial (eg, parallel | Page 7   |
| 42 |                           |                     | group, crossover, factorial, single group), allocation ratio, and |          |
| 43 |                           |                     | framework (eg, superiority, equivalence, non-inferiority,         |          |
| 44 |                           |                     | exploratory)                                                      |          |
| 45 |                           |                     |                                                                   |          |
| 46 |                           |                     |                                                                   |          |
| 47 |                           |                     |                                                                   |          |
| 48 | <b>Methods:</b>           |                     |                                                                   |          |
| 49 | <b>Participants,</b>      |                     |                                                                   |          |
| 50 | <b>interventions, and</b> |                     |                                                                   |          |
| 51 | <b>outcomes</b>           |                     |                                                                   |          |
| 52 |                           |                     |                                                                   |          |
| 53 |                           |                     |                                                                   |          |
| 54 |                           |                     |                                                                   |          |
| 55 | Study setting             | <a href="#">#9</a>  | Description of study settings (eg, community clinic, academic     | Page 7   |
| 56 |                           |                     | hospital) and list of countries where data will be collected.     |          |
| 57 |                           |                     | Reference to where list of study sites can be obtained            |          |
| 58 |                           |                     |                                                                   |          |
| 59 |                           |                     |                                                                   |          |
| 60 |                           |                     |                                                                   |          |

|    |                      |                      |                                                                                                                                                                                                                                                                                                                                                                                |            |
|----|----------------------|----------------------|--------------------------------------------------------------------------------------------------------------------------------------------------------------------------------------------------------------------------------------------------------------------------------------------------------------------------------------------------------------------------------|------------|
| 1  | Eligibility criteria | <a href="#">#10</a>  | Inclusion and exclusion criteria for participants. If applicable, eligibility criteria for study centres and individuals who will perform the interventions (eg, surgeons, psychotherapists)                                                                                                                                                                                   | Page 8     |
| 2  |                      |                      |                                                                                                                                                                                                                                                                                                                                                                                |            |
| 3  |                      |                      |                                                                                                                                                                                                                                                                                                                                                                                |            |
| 4  |                      |                      |                                                                                                                                                                                                                                                                                                                                                                                |            |
| 5  |                      |                      |                                                                                                                                                                                                                                                                                                                                                                                |            |
| 6  | Interventions:       | <a href="#">#11a</a> | Interventions for each group with sufficient detail to allow replication, including how and when they will be administered                                                                                                                                                                                                                                                     | Page 8-13  |
| 7  | description          |                      |                                                                                                                                                                                                                                                                                                                                                                                |            |
| 8  |                      |                      |                                                                                                                                                                                                                                                                                                                                                                                |            |
| 9  |                      |                      |                                                                                                                                                                                                                                                                                                                                                                                |            |
| 10 |                      |                      |                                                                                                                                                                                                                                                                                                                                                                                |            |
| 11 | Interventions:       | <a href="#">#11b</a> | Criteria for discontinuing or modifying allocated interventions for a given trial participant (eg, drug dose change in response to harms, participant request, or improving / worsening disease)                                                                                                                                                                               | N/A        |
| 12 | modifications        |                      |                                                                                                                                                                                                                                                                                                                                                                                |            |
| 13 |                      |                      |                                                                                                                                                                                                                                                                                                                                                                                |            |
| 14 |                      |                      |                                                                                                                                                                                                                                                                                                                                                                                |            |
| 15 |                      |                      |                                                                                                                                                                                                                                                                                                                                                                                |            |
| 16 |                      |                      |                                                                                                                                                                                                                                                                                                                                                                                |            |
| 17 |                      |                      |                                                                                                                                                                                                                                                                                                                                                                                |            |
| 18 | Interventions:       | <a href="#">#11c</a> | Strategies to improve adherence to intervention protocols, and any procedures for monitoring adherence (eg, drug tablet return; laboratory tests)                                                                                                                                                                                                                              | N/A        |
| 19 | adherence            |                      |                                                                                                                                                                                                                                                                                                                                                                                |            |
| 20 |                      |                      |                                                                                                                                                                                                                                                                                                                                                                                |            |
| 21 |                      |                      |                                                                                                                                                                                                                                                                                                                                                                                |            |
| 22 |                      |                      |                                                                                                                                                                                                                                                                                                                                                                                |            |
| 23 |                      |                      |                                                                                                                                                                                                                                                                                                                                                                                |            |
| 24 | Interventions:       | <a href="#">#11d</a> | Relevant concomitant care and interventions that are permitted or prohibited during the trial                                                                                                                                                                                                                                                                                  | N/A        |
| 25 | concomitant care     |                      |                                                                                                                                                                                                                                                                                                                                                                                |            |
| 26 |                      |                      |                                                                                                                                                                                                                                                                                                                                                                                |            |
| 27 |                      |                      |                                                                                                                                                                                                                                                                                                                                                                                |            |
| 28 | Outcomes             | <a href="#">#12</a>  | Primary, secondary, and other outcomes, including the specific measurement variable (eg, systolic blood pressure), analysis metric (eg, change from baseline, final value, time to event), method of aggregation (eg, median, proportion), and time point for each outcome. Explanation of the clinical relevance of chosen efficacy and harm outcomes is strongly recommended | Page 13-16 |
| 29 |                      |                      |                                                                                                                                                                                                                                                                                                                                                                                |            |
| 30 |                      |                      |                                                                                                                                                                                                                                                                                                                                                                                |            |
| 31 |                      |                      |                                                                                                                                                                                                                                                                                                                                                                                |            |
| 32 |                      |                      |                                                                                                                                                                                                                                                                                                                                                                                |            |
| 33 |                      |                      |                                                                                                                                                                                                                                                                                                                                                                                |            |
| 34 |                      |                      |                                                                                                                                                                                                                                                                                                                                                                                |            |
| 35 |                      |                      |                                                                                                                                                                                                                                                                                                                                                                                |            |
| 36 |                      |                      |                                                                                                                                                                                                                                                                                                                                                                                |            |
| 37 |                      |                      |                                                                                                                                                                                                                                                                                                                                                                                |            |
| 38 |                      |                      |                                                                                                                                                                                                                                                                                                                                                                                |            |
| 39 | Participant timeline | <a href="#">#13</a>  | Time schedule of enrolment, interventions (including any run-ins and washouts), assessments, and visits for participants. A schematic diagram is highly recommended (see Figure)                                                                                                                                                                                               | Page 16    |
| 40 |                      |                      |                                                                                                                                                                                                                                                                                                                                                                                |            |
| 41 |                      |                      |                                                                                                                                                                                                                                                                                                                                                                                |            |
| 42 |                      |                      |                                                                                                                                                                                                                                                                                                                                                                                |            |
| 43 |                      |                      |                                                                                                                                                                                                                                                                                                                                                                                |            |
| 44 |                      |                      |                                                                                                                                                                                                                                                                                                                                                                                |            |
| 45 |                      |                      |                                                                                                                                                                                                                                                                                                                                                                                |            |
| 46 | Sample size          | <a href="#">#14</a>  | Estimated number of participants needed to achieve study objectives and how it was determined, including clinical and statistical assumptions supporting any sample size calculations                                                                                                                                                                                          | Page 7     |
| 47 |                      |                      |                                                                                                                                                                                                                                                                                                                                                                                |            |
| 48 |                      |                      |                                                                                                                                                                                                                                                                                                                                                                                |            |
| 49 |                      |                      |                                                                                                                                                                                                                                                                                                                                                                                |            |
| 50 |                      |                      |                                                                                                                                                                                                                                                                                                                                                                                |            |
| 51 |                      |                      |                                                                                                                                                                                                                                                                                                                                                                                |            |
| 52 | Recruitment          | <a href="#">#15</a>  | Strategies for achieving adequate participant enrolment to reach target sample size                                                                                                                                                                                                                                                                                            | Page 17    |
| 53 |                      |                      |                                                                                                                                                                                                                                                                                                                                                                                |            |
| 54 |                      |                      |                                                                                                                                                                                                                                                                                                                                                                                |            |
| 55 |                      |                      |                                                                                                                                                                                                                                                                                                                                                                                |            |

**Methods:**  
**Assignment of**

**interventions (for  
controlled trials)**

|    |                        |                      |                                                                 |
|----|------------------------|----------------------|-----------------------------------------------------------------|
| 1  |                        |                      |                                                                 |
| 2  |                        |                      |                                                                 |
| 3  |                        |                      |                                                                 |
| 4  | Allocation: sequence   | <a href="#">#16a</a> | Method of generating the allocation sequence (eg, computer-     |
| 5  | generation             |                      | generated random numbers), and list of any factors for          |
| 6  |                        |                      | stratification. To reduce predictability of a random sequence,  |
| 7  |                        |                      | details of any planned restriction (eg, blocking) should be     |
| 8  |                        |                      | provided in a separate document that is unavailable to those    |
| 9  |                        |                      | who enrol participants or assign interventions                  |
| 10 |                        |                      |                                                                 |
| 11 |                        |                      |                                                                 |
| 12 |                        |                      |                                                                 |
| 13 |                        |                      |                                                                 |
| 14 | Allocation             | <a href="#">#16b</a> | Mechanism of implementing the allocation sequence (eg,          |
| 15 | concealment            |                      | central telephone; sequentially numbered, opaque, sealed        |
| 16 | mechanism              |                      | envelopes), describing any steps to conceal the sequence until  |
| 17 |                        |                      | interventions are assigned                                      |
| 18 |                        |                      |                                                                 |
| 19 |                        |                      |                                                                 |
| 20 | Allocation:            | <a href="#">#16c</a> | Who will generate the allocation sequence, who will enrol       |
| 21 | implementation         |                      | participants, and who will assign participants to interventions |
| 22 |                        |                      |                                                                 |
| 23 |                        |                      |                                                                 |
| 24 | Blinding (masking)     | <a href="#">#17a</a> | Who will be blinded after assignment to interventions (eg,      |
| 25 |                        |                      | trial participants, care providers, outcome assessors, data     |
| 26 |                        |                      | analysts), and how                                              |
| 27 |                        |                      |                                                                 |
| 28 |                        |                      |                                                                 |
| 29 |                        |                      |                                                                 |
| 30 | Blinding (masking):    | <a href="#">#17b</a> | If blinded, circumstances under which unblinding is             |
| 31 | emergency unblinding   |                      | permissible, and procedure for revealing a participant's        |
| 32 |                        |                      | allocated intervention during the trial                         |
| 33 |                        |                      |                                                                 |
| 34 |                        |                      |                                                                 |
| 35 | <b>Methods: Data</b>   |                      |                                                                 |
| 36 | <b>collection,</b>     |                      |                                                                 |
| 37 | <b>management, and</b> |                      |                                                                 |
| 38 | <b>analysis</b>        |                      |                                                                 |
| 39 |                        |                      |                                                                 |
| 40 |                        |                      |                                                                 |
| 41 |                        |                      |                                                                 |
| 42 | Data collection plan   | <a href="#">#18a</a> | Plans for assessment and collection of outcome, baseline, and   |
| 43 |                        |                      | other trial data, including any related processes to promote    |
| 44 |                        |                      | data quality (eg, duplicate measurements, training of           |
| 45 |                        |                      | assessors) and a description of study instruments (eg,          |
| 46 |                        |                      | questionnaires, laboratory tests) along with their reliability  |
| 47 |                        |                      | and validity, if known. Reference to where data collection      |
| 48 |                        |                      | forms can be found, if not in the protocol                      |
| 49 |                        |                      |                                                                 |
| 50 |                        |                      |                                                                 |
| 51 |                        |                      |                                                                 |
| 52 |                        |                      |                                                                 |
| 53 | Data collection plan:  | <a href="#">#18b</a> | Plans to promote participant retention and complete follow-     |
| 54 | retention              |                      | up, including list of any outcome data to be collected for      |
| 55 |                        |                      | participants who discontinue or deviate from intervention       |
| 56 |                        |                      | protocols                                                       |
| 57 |                        |                      |                                                                 |
| 58 |                        |                      |                                                                 |
| 59 |                        |                      |                                                                 |
| 60 |                        |                      |                                                                 |

|    |                                                  |                      |                                                                                                                                                                                                                                                                                                                                       |         |
|----|--------------------------------------------------|----------------------|---------------------------------------------------------------------------------------------------------------------------------------------------------------------------------------------------------------------------------------------------------------------------------------------------------------------------------------|---------|
| 1  | Data management                                  | <a href="#">#19</a>  | Plans for data entry, coding, security, and storage, including any related processes to promote data quality (eg, double data entry; range checks for data values). Reference to where details of data management procedures can be found, if not in the protocol                                                                     | Page 18 |
| 2  |                                                  |                      |                                                                                                                                                                                                                                                                                                                                       |         |
| 3  |                                                  |                      |                                                                                                                                                                                                                                                                                                                                       |         |
| 4  |                                                  |                      |                                                                                                                                                                                                                                                                                                                                       |         |
| 5  |                                                  |                      |                                                                                                                                                                                                                                                                                                                                       |         |
| 6  |                                                  |                      |                                                                                                                                                                                                                                                                                                                                       |         |
| 7  |                                                  |                      |                                                                                                                                                                                                                                                                                                                                       |         |
| 8  |                                                  |                      |                                                                                                                                                                                                                                                                                                                                       |         |
| 9  | Statistics: outcomes                             | <a href="#">#20a</a> | Statistical methods for analysing primary and secondary outcomes. Reference to where other details of the statistical analysis plan can be found, if not in the protocol                                                                                                                                                              | Page 19 |
| 10 |                                                  |                      |                                                                                                                                                                                                                                                                                                                                       |         |
| 11 |                                                  |                      |                                                                                                                                                                                                                                                                                                                                       |         |
| 12 |                                                  |                      |                                                                                                                                                                                                                                                                                                                                       |         |
| 13 |                                                  |                      |                                                                                                                                                                                                                                                                                                                                       |         |
| 14 | Statistics: additional analyses                  | <a href="#">#20b</a> | Methods for any additional analyses (eg, subgroup and adjusted analyses)                                                                                                                                                                                                                                                              | N/A     |
| 15 |                                                  |                      |                                                                                                                                                                                                                                                                                                                                       |         |
| 16 |                                                  |                      |                                                                                                                                                                                                                                                                                                                                       |         |
| 17 |                                                  |                      |                                                                                                                                                                                                                                                                                                                                       |         |
| 18 | Statistics: analysis population and missing data | <a href="#">#20c</a> | Definition of analysis population relating to protocol non-adherence (eg, as randomised analysis), and any statistical methods to handle missing data (eg, multiple imputation)                                                                                                                                                       | Page 19 |
| 19 |                                                  |                      |                                                                                                                                                                                                                                                                                                                                       |         |
| 20 |                                                  |                      |                                                                                                                                                                                                                                                                                                                                       |         |
| 21 |                                                  |                      |                                                                                                                                                                                                                                                                                                                                       |         |
| 22 |                                                  |                      |                                                                                                                                                                                                                                                                                                                                       |         |
| 23 |                                                  |                      |                                                                                                                                                                                                                                                                                                                                       |         |
| 24 | <b>Methods:</b>                                  |                      |                                                                                                                                                                                                                                                                                                                                       |         |
| 25 | <b>Monitoring</b>                                |                      |                                                                                                                                                                                                                                                                                                                                       |         |
| 26 |                                                  |                      |                                                                                                                                                                                                                                                                                                                                       |         |
| 27 | Data monitoring: formal committee                | <a href="#">#21a</a> | Composition of data monitoring committee (DMC); summary of its role and reporting structure; statement of whether it is independent from the sponsor and competing interests; and reference to where further details about its charter can be found, if not in the protocol. Alternatively, an explanation of why a DMC is not needed | N/A     |
| 28 |                                                  |                      |                                                                                                                                                                                                                                                                                                                                       |         |
| 29 |                                                  |                      |                                                                                                                                                                                                                                                                                                                                       |         |
| 30 |                                                  |                      |                                                                                                                                                                                                                                                                                                                                       |         |
| 31 |                                                  |                      |                                                                                                                                                                                                                                                                                                                                       |         |
| 32 |                                                  |                      |                                                                                                                                                                                                                                                                                                                                       |         |
| 33 |                                                  |                      |                                                                                                                                                                                                                                                                                                                                       |         |
| 34 |                                                  |                      |                                                                                                                                                                                                                                                                                                                                       |         |
| 35 |                                                  |                      |                                                                                                                                                                                                                                                                                                                                       |         |
| 36 |                                                  |                      |                                                                                                                                                                                                                                                                                                                                       |         |
| 37 | Data monitoring: interim analysis                | <a href="#">#21b</a> | Description of any interim analyses and stopping guidelines, including who will have access to these interim results and make the final decision to terminate the trial                                                                                                                                                               | N/A     |
| 38 |                                                  |                      |                                                                                                                                                                                                                                                                                                                                       |         |
| 39 |                                                  |                      |                                                                                                                                                                                                                                                                                                                                       |         |
| 40 |                                                  |                      |                                                                                                                                                                                                                                                                                                                                       |         |
| 41 |                                                  |                      |                                                                                                                                                                                                                                                                                                                                       |         |
| 42 |                                                  |                      |                                                                                                                                                                                                                                                                                                                                       |         |
| 43 | Harms                                            | <a href="#">#22</a>  | Plans for collecting, assessing, reporting, and managing solicited and spontaneously reported adverse events and other unintended effects of trial interventions or trial conduct                                                                                                                                                     | N/A     |
| 44 |                                                  |                      |                                                                                                                                                                                                                                                                                                                                       |         |
| 45 |                                                  |                      |                                                                                                                                                                                                                                                                                                                                       |         |
| 46 |                                                  |                      |                                                                                                                                                                                                                                                                                                                                       |         |
| 47 |                                                  |                      |                                                                                                                                                                                                                                                                                                                                       |         |
| 48 | Auditing                                         | <a href="#">#23</a>  | Frequency and procedures for auditing trial conduct, if any, and whether the process will be independent from investigators and the sponsor                                                                                                                                                                                           | N/A     |
| 49 |                                                  |                      |                                                                                                                                                                                                                                                                                                                                       |         |
| 50 |                                                  |                      |                                                                                                                                                                                                                                                                                                                                       |         |
| 51 |                                                  |                      |                                                                                                                                                                                                                                                                                                                                       |         |
| 52 |                                                  |                      |                                                                                                                                                                                                                                                                                                                                       |         |
| 53 | <b>Ethics and dissemination</b>                  |                      |                                                                                                                                                                                                                                                                                                                                       |         |
| 54 |                                                  |                      |                                                                                                                                                                                                                                                                                                                                       |         |
| 55 |                                                  |                      |                                                                                                                                                                                                                                                                                                                                       |         |
| 56 |                                                  |                      |                                                                                                                                                                                                                                                                                                                                       |         |
| 57 | Research ethics approval                         | <a href="#">#24</a>  | Plans for seeking research ethics committee / institutional review board (REC / IRB) approval                                                                                                                                                                                                                                         | Page 19 |
| 58 |                                                  |                      |                                                                                                                                                                                                                                                                                                                                       |         |
| 59 |                                                  |                      |                                                                                                                                                                                                                                                                                                                                       |         |
| 60 |                                                  |                      |                                                                                                                                                                                                                                                                                                                                       |         |

|    |                                             |                      |                                                                                                                                                                                                                                                                                     |         |
|----|---------------------------------------------|----------------------|-------------------------------------------------------------------------------------------------------------------------------------------------------------------------------------------------------------------------------------------------------------------------------------|---------|
| 1  | Protocol amendments                         | <a href="#">#25</a>  | Plans for communicating important protocol modifications (eg, changes to eligibility criteria, outcomes, analyses) to relevant parties (eg, investigators, REC / IRBs, trial participants, trial registries, journals, regulators)                                                  | N/A     |
| 2  |                                             |                      |                                                                                                                                                                                                                                                                                     |         |
| 3  |                                             |                      |                                                                                                                                                                                                                                                                                     |         |
| 4  |                                             |                      |                                                                                                                                                                                                                                                                                     |         |
| 5  |                                             |                      |                                                                                                                                                                                                                                                                                     |         |
| 6  |                                             |                      |                                                                                                                                                                                                                                                                                     |         |
| 7  |                                             |                      |                                                                                                                                                                                                                                                                                     |         |
| 8  | Consent or assent                           | <a href="#">#26a</a> | Who will obtain informed consent or assent from potential trial participants or authorised surrogates, and how (see Item 32)                                                                                                                                                        | Page 19 |
| 9  |                                             |                      |                                                                                                                                                                                                                                                                                     |         |
| 10 |                                             |                      |                                                                                                                                                                                                                                                                                     |         |
| 11 |                                             |                      |                                                                                                                                                                                                                                                                                     |         |
| 12 |                                             |                      |                                                                                                                                                                                                                                                                                     |         |
| 13 | Consent or assent: ancillary studies        | <a href="#">#26b</a> | Additional consent provisions for collection and use of participant data and biological specimens in ancillary studies, if applicable                                                                                                                                               | Page 19 |
| 14 |                                             |                      |                                                                                                                                                                                                                                                                                     |         |
| 15 |                                             |                      |                                                                                                                                                                                                                                                                                     |         |
| 16 |                                             |                      |                                                                                                                                                                                                                                                                                     |         |
| 17 |                                             |                      |                                                                                                                                                                                                                                                                                     |         |
| 18 | Confidentiality                             | <a href="#">#27</a>  | How personal information about potential and enrolled participants will be collected, shared, and maintained in order to protect confidentiality before, during, and after the trial                                                                                                | Page 19 |
| 19 |                                             |                      |                                                                                                                                                                                                                                                                                     |         |
| 20 |                                             |                      |                                                                                                                                                                                                                                                                                     |         |
| 21 |                                             |                      |                                                                                                                                                                                                                                                                                     |         |
| 22 |                                             |                      |                                                                                                                                                                                                                                                                                     |         |
| 23 |                                             |                      |                                                                                                                                                                                                                                                                                     |         |
| 24 | Declaration of interests                    | <a href="#">#28</a>  | Financial and other competing interests for principal investigators for the overall trial and each study site                                                                                                                                                                       | Page 29 |
| 25 |                                             |                      |                                                                                                                                                                                                                                                                                     |         |
| 26 |                                             |                      |                                                                                                                                                                                                                                                                                     |         |
| 27 | Data access                                 | <a href="#">#29</a>  | Statement of who will have access to the final trial dataset, and disclosure of contractual agreements that limit such access for investigators                                                                                                                                     | N/A     |
| 28 |                                             |                      |                                                                                                                                                                                                                                                                                     |         |
| 29 |                                             |                      |                                                                                                                                                                                                                                                                                     |         |
| 30 |                                             |                      |                                                                                                                                                                                                                                                                                     |         |
| 31 |                                             |                      |                                                                                                                                                                                                                                                                                     |         |
| 32 |                                             |                      |                                                                                                                                                                                                                                                                                     |         |
| 33 | Ancillary and post trial care               | <a href="#">#30</a>  | Provisions, if any, for ancillary and post-trial care, and for compensation to those who suffer harm from trial participation                                                                                                                                                       | N/A     |
| 34 |                                             |                      |                                                                                                                                                                                                                                                                                     |         |
| 35 |                                             |                      |                                                                                                                                                                                                                                                                                     |         |
| 36 |                                             |                      |                                                                                                                                                                                                                                                                                     |         |
| 37 |                                             |                      |                                                                                                                                                                                                                                                                                     |         |
| 38 | Dissemination policy: trial results         | <a href="#">#31a</a> | Plans for investigators and sponsor to communicate trial results to participants, healthcare professionals, the public, and other relevant groups (eg, via publication, reporting in results databases, or other data sharing arrangements), including any publication restrictions | Page 19 |
| 39 |                                             |                      |                                                                                                                                                                                                                                                                                     |         |
| 40 |                                             |                      |                                                                                                                                                                                                                                                                                     |         |
| 41 |                                             |                      |                                                                                                                                                                                                                                                                                     |         |
| 42 |                                             |                      |                                                                                                                                                                                                                                                                                     |         |
| 43 |                                             |                      |                                                                                                                                                                                                                                                                                     |         |
| 44 |                                             |                      |                                                                                                                                                                                                                                                                                     |         |
| 45 |                                             |                      |                                                                                                                                                                                                                                                                                     |         |
| 46 | Dissemination policy: authorship            | <a href="#">#31b</a> | Authorship eligibility guidelines and any intended use of professional writers                                                                                                                                                                                                      | N/A     |
| 47 |                                             |                      |                                                                                                                                                                                                                                                                                     |         |
| 48 |                                             |                      |                                                                                                                                                                                                                                                                                     |         |
| 49 |                                             |                      |                                                                                                                                                                                                                                                                                     |         |
| 50 | Dissemination policy: reproducible research | <a href="#">#31c</a> | Plans, if any, for granting public access to the full protocol, participant-level dataset, and statistical code                                                                                                                                                                     | N/A     |
| 51 |                                             |                      |                                                                                                                                                                                                                                                                                     |         |
| 52 |                                             |                      |                                                                                                                                                                                                                                                                                     |         |
| 53 |                                             |                      |                                                                                                                                                                                                                                                                                     |         |
| 54 | <b>Appendices</b>                           |                      |                                                                                                                                                                                                                                                                                     |         |
| 55 |                                             |                      |                                                                                                                                                                                                                                                                                     |         |
| 56 | Informed consent materials                  | <a href="#">#32</a>  | Model consent form and other related documentation given to participants and authorised surrogates                                                                                                                                                                                  | N/A     |
| 57 |                                             |                      |                                                                                                                                                                                                                                                                                     |         |
| 58 |                                             |                      |                                                                                                                                                                                                                                                                                     |         |
| 59 |                                             |                      |                                                                                                                                                                                                                                                                                     |         |
| 60 |                                             |                      |                                                                                                                                                                                                                                                                                     |         |

1 Biological specimens [#33](#) Plans for collection, laboratory evaluation, and storage of N/A  
2 biological specimens for genetic or molecular analysis in the  
3 current trial and for future use in ancillary studies, if  
4 applicable  
5  
6  
7

8 Notes:  
9

- 10 • 1: Title page; full title, page no. 1
- 11
- 12 • 2a: Abstract; trial registration, page no. 2
- 13
- 14
- 15 • 5a: Page 1 and 29 The SPIRIT Explanation and Elaboration paper is distributed under the terms of the  
16 Creative Commons Attribution License CC-BY-NC. This checklist was completed on 17. August 2021  
17 using <https://www.goodreports.org/>, a tool made by the [EQUATOR Network](#) in collaboration with  
18 [Penelope.ai](#)  
19  
20  
21  
22  
23  
24  
25  
26  
27  
28  
29  
30  
31  
32  
33  
34  
35  
36  
37  
38  
39  
40  
41  
42  
43  
44  
45  
46  
47  
48  
49  
50  
51  
52  
53  
54  
55  
56  
57  
58  
59  
60



## PROJECT DESCRIPTION

### Title

The Energy Conservation Education Intervention for People with End-stage Kidney Disease Receiving Haemodialysis (EVEREST)

### Trial registration

Clinicaltrials.gov: NCT04360408

### Project Team Roles & Responsibilities

1. Professor Ann Bonner (Principal supervisor): Principal investigator  
Head of School of Nursing and Midwifery, Griffith University  
Professor Ann Bonner (Principal supervisor) is the principal investigator of this research project. She is primarily responsible for providing supervision for the con-investigator in the conduct of this research project. She coordinates the supervisory team and student, provides academic leadership, and overall monitoring of the project.
2. Sita Sharma (PhD Student): Co-investigator  
School of Nursing and Midwifery, Griffith University  
Ms Sharma is responsible for overseeing all aspects of the project from protocol design, recruitment, data collection and data analyses. She is responsible for the ethical conduct of the project, protecting human participants' right, safety, welfare, protocol compliance, ensuring informed consent is appropriately obtained from each participant. She is also responsible for providing training to research assistants to ensure that they can commence their role in the study protocol.
3. Dr Winnie Wu (Associate Supervisor): Co-investigator  
Lecturer, School of Nursing and Midwifery, Griffith University  
Dr Wu is responsible for supervision in this project.
4. Professor Theresa Green (Associate Supervisor): Co-investigator, Conjoint  
Professor of Nursing, MNHHS/School of Nursing, Midwifery and Social Work,

1  
2  
3 University of Queensland. Professor Green is responsible for supervision in  
4 this project.  
5

6  
7 5. Associate Professor Kim Alexander (Associate Supervisor): Co-investigator  
8 Associate Professor, School of Nursing, Queensland University of  
9 Technology. A/Professor Alexander is responsible for overall supervision in  
10 this project.  
11  
12

13  
14 6. Professor Rishi Kumar Kafle (Local Supervisor): Co-investigator  
15 Director at National Kidney Centre, Kathmandu, Nepal. Professor Kafle is  
16 responsible for supervising the conduct of the local researchers.  
17  
18  
19

## 20 21 **Funding**

22  
23 The conduct of this research will not require any external funding. Cost related to  
24 data collection and intervention will be drawn from student research allocation  
25 account.  
26  
27

## 28 29 **1. Introduction**

### 30 31 **1.1 Background**

32  
33 Chronic kidney disease (CKD) is a major global public health problem and  
34 contributor to the overall global burden of non-communicable disease (Jha, 2013),  
35 affecting about 13% of the population (Hill et al., 2016). It is defined as any  
36 degree of kidney damage or decline in kidney function or glomerular filtration rate  
37 (GFR)  $< 60.0\text{ml/min}/1.73\text{m}^2$  for three months or longer irrespective of the cause  
38 (Webster, Nagler, Morton, & Masson, 2017). The classification of CKD is based on  
39 cause of disease, level of GFR and level of albuminuria which is collectively called  
40 CGA classification (Levey et al., 2020). If GFR  $< 15\text{ ml/min}/1.73\text{m}^2$  or treated by  
41 dialysis, then the term "kidney failure" is used to specify CKD stage G5 (Levey et  
42 al., 2020).  
43  
44  
45  
46  
47  
48  
49

50  
51 Worldwide, a concomitant rise in the incidence of kidney failure is anticipated due  
52 to diabetes and hypertension, resulting in a higher prevalence of CKD (Jha, 2013).  
53 Currently, the prevalence of kidney failure is estimated based on data about the  
54 people who have received KRT. However, that is likely an underestimation of  
55 people with kidney failure (Anand, Bitton, & Gaziano, 2013). Each year around 2.3  
56 to 7.1 million progress to kidney failure and KRT globally, and those from low to  
57  
58  
59  
60

1  
2  
3 middle-income countries are disproportionately represented in these statistics  
4 (International Society of Nephrology (ISN), 2019).  
5  
6  
7

8 Progression of CKD to kidney failure depends on many factors, such as underlying  
9 cause, disease-specific pathology, and predisposing factors (Ekart et al., 2013).  
10 Diabetes and hypertension are the two predominant causes for the development  
11 of kidney failure globally (Leonberg-Yoo & Weiner, 2016). Glomerulonephritis,  
12 polycystic kidney disease, obstruction of the urinary tract, recurrent  
13 pyelonephritis, medications such as Non-steroid anti-inflammatory drugs  
14 (NSAIDs), calcineurin inhibitors, and antiretroviral are other known causes kidney  
15 failure (Benjamin & Lappin, 2018).  
16  
17  
18  
19  
20  
21  
22  
23

24 People with kidney failure undergoing KRT experience a wide range of debilitating  
25 physical and psychological symptoms that may eventually have an impact on  
26 health-related quality of life (HRQoL). Impaired HRQoL may be associated with  
27 higher rates of hospitalisation and mortality (Chambers et al., 2016; Dąbrowska-  
28 Bender, Dykowska, Żuk, Milewska, & Staniszevska, 2018). Both kidney failure  
29 symptom burden and changes in HRQoL are often unrecognised by healthcare  
30 professionals (Cox, Parshall, Hernandez, Parvez, & Unruh, 2017; Senanayake et  
31 al., 2017).  
32  
33  
34  
35  
36  
37  
38  
39

## 40 **1.2 Rationale/Justification**

41  
42 Individuals living with kidney failure receiving haemodialysis (HD) experience  
43 several symptoms that can affect their ability to do activities of daily livings.  
44 Symptom burden in this population may be related to the underlying pathology,  
45 presence of multiple co-morbidities, accumulation of uraemic toxins or fluids, side  
46 effects of medication, and inadequacy of dialysis (Moskovitch, Mount, & Davies,  
47 2019). Many cross-sectional studies and systematic reviews report the symptom  
48 burden in people with kidney failure receiving HD (Almutary, Bonner, & Douglas,  
49 2013, 2016; Bossola, Pepe, Picca, Calvani, & Marzetti, 2019; Dąbrowska-Bender,  
50 Dykowska, Żuk, Milewska, & Staniszevska, 2018; Davison, 2010; Moskovitch,  
51 Mount, & Davies, 2019). Almutary, Bonner, and Douglas (2016) in their study,  
52 reported that the mean number of symptoms and symptoms severity was highest  
53  
54  
55  
56  
57  
58  
59  
60

1  
2  
3 in people receiving HD than other groups. The same study also reported the most  
4 common symptoms experienced in this population as fatigue (84.8%), bone joint  
5 pain (68.7%), itching (65%), and decreased appetite (56.5%).  
6  
7  
8  
9

10  
11 Fatigue is the most common physical symptom reported by 70% - 85% of people  
12 undergoing HD (Almutary, Bonner, & Douglas, 2013; Bossola et al., 2018). Fatigue  
13 is an overwhelming subjective feeling of physical and mental exhaustion, that  
14 affects an individual's everyday functioning (Bossola, Vulpio, & Tazza, 2011; Zalai  
15 & Bohra, 2016), HRQoL (Kraus et al., 2016). Fatigue is also associated with  
16 increase hospitalisation and mortality (Picariello, Moss-Morris, Macdougall, &  
17 Chilcot, 2016). Several factors have been associated with fatigue in people  
18 receiving HD including demographic (gender, age, educational status),  
19 physiological (BUN, anaemia, dialysis inadequacy), psychological factors  
20 (depression, anxiety and sleep disturbances), side effects of treatment, and  
21 treatment efficacy (Artom, Moss-Morris, Caskey, & Chilcot, 2014; Bonner,  
22 Wellard, & Caltabiano, 2008; Bonner, Wellard, & Caltabiano, 2010; Horigan, 2012;  
23 Picariello, Moss-Morris, Macdougall, & Chilcot, 2016). Physical inactivity has also  
24 been associated with fatigue in people undergoing HD (Bonner, Wellard, &  
25 Caltabiano, 2010).  
26  
27  
28  
29  
30  
31  
32  
33  
34  
35

36  
37 Managing fatigue is an essential part of improving HRQoL for individuals on  
38 HD. Similar to patients with other chronic diseases, adults receiving HD may  
39 benefit from self-management strategies to reduce fatigue and other kidney  
40 failure symptoms (Horigan, Schneider, Docherty, & Barroso, 2013). Previous  
41 research has shown that interventions like exercise to increase physical activity  
42 can reduce fatigue. Interventions that have been successful in reducing fatigue  
43 also have limitations and may not be safe for all people. Educational interventions  
44 are believed to improve cancer-related fatigue and fatigue and depression in  
45 people with CKD, not on dialysis (Bennett et al., 2016; Kao, Huang, Chen, & Wang,  
46 2012). Likewise, energy conservation education is another approach that has  
47 shown a significant reduction in fatigue in other chronic diseases, including  
48 multiple sclerosis and cancer. However, its effectiveness is not tested in people  
49 with kidney failure receiving HD.  
50  
51  
52  
53  
54  
55  
56  
57  
58  
59  
60

1  
2  
3 Despite the growing documented burden of fatigue on those receiving HD, the  
4 diagnosis and treatment of fatigue has been paid minimal attention. A recent  
5 systematic review by Sharma, Green, Alexander, and Bonner (2020), also found  
6 that educational interventions targeting symptoms and self-management to  
7 improve HRQoL in people undergoing HD have yet to be evaluated. Thus, the aim  
8 of the proposed research is to test the effect of simple educational intervention  
9 about energy conservation strategies on fatigue and HRQOL in this population.  
10  
11  
12  
13  
14  
15

### 16 **1.3 Research questions**

- 17 1. Is there a difference in fatigue score from baseline to follow up within and  
18 between the intervention and control groups?  
19
- 20 2. Is there a difference in other renal symptom scores from baseline to follow up  
21 within and between the intervention and control groups?  
22
- 23 3. Is there a difference in occupational performance score from baseline to follow  
24 up within and between the intervention and control groups?  
25
- 26 4. Is there a difference in HRQoL score from baseline to follow up within and  
27 between the intervention and control groups?  
28  
29  
30  
31  
32  
33

### 34 **1.4 Research hypothesis**

35  
36 People with kidney failure receiving HD who receive EVEREST compared to usual  
37 care are more likely to:  
38  
39  
40

41 H<sup>1</sup>: have reduced fatigue frequency and severity.  
42

43 H<sup>1</sup>: have reduced number and severity of other renal symptoms.  
44

45 H<sup>1</sup>: have improved occupational performance.  
46  
47

48 H<sup>1</sup>: have improved HRQoL.  
49  
50  
51  
52  
53

### 54 **1.5 Expected Outcomes**

55  
56  
57  
58  
59  
60

1  
2  
3 The outcome of the study will provide empirical evidence about the effectiveness  
4 of an educational intervention about energy conservation for symptom  
5 management in people with kidney failure receiving HD.  
6  
7  
8  
9

## 10 11 **2. Project design**

12  
13 A pragmatic cluster randomised control trial (pCRT) will be used. A pragmatic  
14 design attempts to find an answer to whether an intervention will work under  
15 usual conditions in a real clinical setting (Yoong et al., 2014), so few exclusion  
16 criteria will be applied. To avoid possible treatment contamination because  
17 participants on the same dialysis day may interact with each other as they spend  
18 four hours in close proximity during dialysis necessitates, a cluster design will be  
19 used. Clusters will be based on the day of dialysis. The project protocol has been  
20 registered (Clinicaltrials.gov: NCT04360408).  
21  
22  
23  
24  
25  
26

### 27 28 **2.1 Rationale of choice of methods/design**

29  
30 There are various study designs that can be considered while testing the  
31 effectiveness of an intervention. Randomised controlled trials (RCTs) are the best  
32 way to study the safety and efficacy of any new treatment or intervention (Hariton  
33 & Locascio, 2018). However, when the type of intervention carries a high risk of  
34 contamination that is, when the individuals randomised to different comparison  
35 groups are in contact with each other and may be influenced by contamination,  
36 cluster randomised control trial (CRT) are well suited in that case (Lorenz, Köpke,  
37 Pfaff, & Blettner, 2018). Thus, CRT was chosen as a design of this study.  
38  
39  
40  
41  
42  
43  
44

### 45 46 **2.2 Research project setting**

47  
48 The study will be conducted at National Kidney Centre (NKC), Kathmandu, Nepal.  
49 The NKC, is the non-profit, non-governmental organisation with the largest HD  
50 treatment facility in Nepal. The NKC can serve around 240 people for HD treatment  
51 in a month. Currently, the centre has 42 dialysis machines. The NKC provides free  
52 HD service to all patients as implemented by the Ministry of Health and Population,  
53 Nepal.  
54  
55  
56  
57  
58  
59  
60

## 2.3 Participants

### *Inclusion criteria*

Participants diagnosed with kidney failure (eGFR < 15 ml/min/1.73m<sup>2</sup>) and undergoing haemodialysis for ≥ 3 months, aged 18 years and above, able to speak and understand Nepali language and willing to participate will be included in this study.

### *Exclusion criteria*

Participants who are in the early stage of CKD or not dependent on HD, those acutely ill, diagnosed with cognitive impairment and those who are not willing to participate will be excluded.

## 2.4 Intervention

The intervention group will receive usual care from their healthcare providers and the 12 weeks of EVEREST intervention. The EVEREST uses education to teach individuals to recognise and modify their daily activities to reduce fatigue by analysing the daily work, home and leisure activities in all aspects of their life (Blikman et al., 2017). It is designed to reduce the frequency, severity and impact of fatigue, increases a person's use of energy-conservation strategies and improves their confidence level and their ability to manage fatigue (Blikman et al., 2013). Seven energy conservation strategies will form the content of the EVEREST intervention (see table 1); each will be adapted to fit with the daily activities of Nepalese people. These energy conservation strategies were adopted from energy conservation course "Managing Fatigue" developed by Packer, Brink, and Sauriol (1995). The Control group will receive usual care by their healthcare professionals. Both group will receive educational booklet at the end of the study.

**Table 1 Summary of the content of the EVEREST**

| Session               | Goal and objectives                                                                                                                                                                                                                                                                                                                                                                                                                                                                                                              | Topics                                                                                                                                                                                                                                                                                                                                                                                  | Duration      | Teaching methods                                                                                                  |
|-----------------------|----------------------------------------------------------------------------------------------------------------------------------------------------------------------------------------------------------------------------------------------------------------------------------------------------------------------------------------------------------------------------------------------------------------------------------------------------------------------------------------------------------------------------------|-----------------------------------------------------------------------------------------------------------------------------------------------------------------------------------------------------------------------------------------------------------------------------------------------------------------------------------------------------------------------------------------|---------------|-------------------------------------------------------------------------------------------------------------------|
| Session 1<br>(Week 1) | <p>Goal: The goal of this session is to provide information about fatigue in kidney failure and, its causes, the fatigue cycle, and energy conservation and strategies.</p> <p>Objectives</p> <ul style="list-style-type: none"> <li>To set a friendly environment and develop a trusting interpersonal relationship</li> <li>To give information about fatigue, its causes</li> <li>To give information about energy conservation, energy conservation strategy 1 and its application in activities of daily livings</li> </ul> | <ul style="list-style-type: none"> <li>Introduction of fatigue in kidney failure</li> <li>Causes of fatigue.</li> <li>Introduction of energy conservation</li> <li>Energy conservation strategies and its application in activities of daily livings</li> <li>✓ Strategy 1: Organising daily routines and activities</li> <li>Summary</li> </ul>                                        | 30-45 minutes | <p>A face-face session with the help of PowerPoint on the laptop</p> <p>Question and answer</p> <p>Discussion</p> |
| Session 2<br>(Week 3) | <p>Goal: The goal of this session is to provide information about energy conservation strategies two, three, four and five and its application in activities of daily living</p> <p>Objectives</p> <ul style="list-style-type: none"> <li>To set a friendly environment and prepare participant for educational session.</li> <li>To revise the content of session one.</li> <li>To provide opportunity to ask question about previous session.</li> </ul>                                                                       | <ul style="list-style-type: none"> <li>Revision of previous session.</li> <li>Energy conservation strategies and its application in activities of daily livings</li> <li>✓ Strategy 2: Simplifying everyday task</li> <li>✓ Strategy 3: Organising place for activities and using the energy-efficient appliances</li> <li>✓ Strategy 4: Pacing activities and avoiding rush</li> </ul> | 30 minutes    | <p>A face-face session with the help of PowerPoint on the laptop</p> <p>Question and answer</p> <p>Discussion</p> |



|                                     |                                                                                                                                                                                                                                                                                                                                                                                                                                                                                                                                                                                                  |                                                                                                                                                                                                                                                                                                                               |               |                                                                                                                   |
|-------------------------------------|--------------------------------------------------------------------------------------------------------------------------------------------------------------------------------------------------------------------------------------------------------------------------------------------------------------------------------------------------------------------------------------------------------------------------------------------------------------------------------------------------------------------------------------------------------------------------------------------------|-------------------------------------------------------------------------------------------------------------------------------------------------------------------------------------------------------------------------------------------------------------------------------------------------------------------------------|---------------|-------------------------------------------------------------------------------------------------------------------|
|                                     | <ul style="list-style-type: none"> <li>To give information about energy conservation 2,3,4, 5 and its application in activities of daily living</li> </ul>                                                                                                                                                                                                                                                                                                                                                                                                                                       | <ul style="list-style-type: none"> <li>✓ Strategy 5: The value of rest and having rest periods during the day</li> <li>• Summary</li> </ul>                                                                                                                                                                                   |               |                                                                                                                   |
| Session 3 (Week 5)                  | <p>Goal: The goal of this session is to provide information about energy conservation strategies 6,7 and its application in activities of daily living</p> <p>Objectives</p> <ul style="list-style-type: none"> <li>To set a friendly environment and prepare participant for educational session</li> <li>To revise session two</li> <li>To identify any concern about previous session</li> <li>To provide opportunity to ask question about previous session</li> <li>To give information about energy conservation six, seven and its application in activities of daily livings.</li> </ul> | <ul style="list-style-type: none"> <li>• Revision of previous session</li> <li>• Energy conservation strategies and its application if activities of daily livings</li> <li>✓ Strategy 6: Communicating personal needs to others</li> <li>✓ Strategy 7: Using proper body mechanics and posture</li> <li>• Summary</li> </ul> | 30 minutes    | <p>A face-face session with the help of PowerPoint on the laptop</p> <p>Question and answer</p> <p>Discussion</p> |
| Session 4 Booster session (Week 10) | <p>Goal: The goal of this session is to revise the content of all session with the help of educational booklet.</p> <p>Objectives</p> <ul style="list-style-type: none"> <li>To set a friendly environment and prepare participant for educational session</li> <li>To provide opportunity to ask question about previous session</li> <li>To revise session 1, 2 and 3</li> <li>To reflect on progress in meeting the objectives of each session</li> </ul>                                                                                                                                     | <ul style="list-style-type: none"> <li>• Revision of previous session</li> <li>• Summarise the content of the booklet</li> <li>✓ Fatigue, energy conservation, its strategies and application in activities of daily livings</li> </ul>                                                                                       | 30-45 minutes | <p>A face-face session with the help of booklet</p> <p>Question and answer</p> <p>Discussion</p>                  |

### *Face-to-face education session*

Four face-to-face educational sessions will be undertaken during their regular HD treatment. Sessions will be in weeks 1, 3, 5, followed by a booster session in week 10. Each session will be for 30-45 minutes duration. Trained research assistants will deliver the entire intervention to avoid information bias. The simple language will be used to explain each strategy as well as PowerPoint presentation displayed on a laptop.

### *Educational booklet*

Educational sessions will be supplemented by a booklet based on the evidence and designed to be understood by an individual with minimal literacy to give a better understanding of fatigue in kidney failure, causes of fatigue, energy conservation strategies and its application in activities of daily living. The booklet consists of contents that align with each of the sessions. Simple text information, along with informative images, will be used to assist participants to understand and apply the energy conservation strategies.

## **2.5 Outcomes**

### **2.5.1 Primary outcome**

#### *Fatigue*

The primary outcome of the study is fatigue which is measured at Time 0 = baseline, Time 1 = week 4, Time 2 = week 8 and Time 3 = week 12 using the Fatigue Symptom Inventory (Hann et al., 1998). This self-report instrument is comprising 14 items that assess the frequency, severity, daily pattern of fatigue and its perceived interference with quality of life. Fatigue severity is measured by 11-point item (0= not at all fatigue, 10= as fatigued as I could be) that assesses least, average and most fatigue in the past week and right now. A composite fatigue score (FSI composite) was derived by calculating the average across the three severity items. Frequency is measured as the number of days in the past week (0-7) that participants felt fatigue as well as the percentage of each day on average they felt fatigued (0%= none of the day; 100%= the entire day). Perceived interference is measured on separate 11-point scales (0 = no interference; 10 = extreme interference) that assess the degree to which fatigue in the past week was judged to interfere with the general level of activity, ability

1  
2  
3 to bathe and dress, normal work activity, ability to concentrate, relations with  
4 others, enjoyment of life, and mood. These interference ratings can be summed  
5 (and averaged) to obtain a total perceived interference score. The final item  
6 provides qualitative information about possible diurnal variation in the daily  
7 experience of fatigue. The FSI has been used in the study population (Ju et al.,  
8 2018). This instrument was translated into the Nepali language, and has a  
9 Cronbach's alpha was 0.79 (Dahal & Meheta, 2018).

### 16 **2.5.2 Secondary outcomes**

17 Secondary outcomes are other renal symptoms, occupational performance and  
18 HRQoL, which will be measured at Time 0 = Baseline and Time 1 = Week 12.  
19

#### 23 *Other renal symptoms*

24 Other renal symptoms will be measured using the IPOS-Renal; a short 11-item  
25 measure which combines the most common symptoms experienced by people with  
26 kidney disease and additional items such as information needs, practice issues,  
27 and anxiety of family (Cicely Saunders Institute, 2016b; Murphy, Murtagh, Carey,  
28 & Sheerin, 2009). Question 2 of this instrument addresses 15 specific symptoms  
29 for each of these; five answer option is available (0-4; Cicely Saunders Institute,  
30 2016a). Question 3-9 addresses the psychological, spiritual, communication and  
31 practical problem or concern, for each of these, five answer option is available (0-  
32 4). Question 1 and 11 are not scored. The overall IPOS-renal score can range from  
33 zero to 92. The IPOS-Renal demonstrates good reliability and validity (Raj, Ahuja,  
34 Frandsen, Murtagh, & Jose, 2018); however, it is not yet available in the Nepali  
35 language. This instrument was translated into Nepali in the initial phase of this  
36 study. Translation process recommended by Sousa and Rojjanasrirat (2011) was  
37 used to translate the instrument in English to the Nepali language. Content validity  
38 index will be calculated to ensure the content validity while reliability of the  
39 instrument will be tested in a representative sample of HD participants in this  
40 study.  
41

#### 55 *Occupational performance*

56 Occupational performance will be measured using the Nepali version of the  
57 Canadian occupational performance measure (Law et al., 1990). It is designed to  
58 identify changes in occupational performance over a period. Administration of  
59  
60

1  
2  
3 COPM requires five steps. First, the individual identifies and prioritises everyday  
4 issues that restrict or impact the performance within the area of self-care,  
5 productivity, and leisure. Second, the individual has to rate the identified problem  
6 in terms of their importance on a scale of (not important at all) to 10 (extremely  
7 important). Third, the individual chose the five most urgent or important problem  
8 on which to focus during the intervention. Fourth, the individual rates their  
9 performance and satisfaction. Both scales range from 1-10, with higher values  
10 indicating better performance and greater satisfaction. After an appropriate  
11 interval, performance and satisfaction with performance are reassessed and  
12 calculated to measure changes in the individual's perceived occupational  
13 performance throughout an intervention. Cronbach's alpha of this instrument for  
14 performance score was 0.89, and for the satisfaction, the score was 0.88 (Carswell  
15 et al., 2004).

### 26 *Health-related quality of life*

27  
28 Health-related quality of life will be measured using the Nepali version of the SF-  
29 36 questionnaire (Kafle-Bhandari et al., 2018). SF-36 contain 36 multidimensional  
30 questions and have eight sub-scales, namely physical functioning (PF), role  
31 physical (RP), bodily pain (BP), role emotional (RE), vitality (VT), general health  
32 (GH), social functioning (SF), and mental health (MH) (Brazier et al., 1992). There  
33 are two distinct concepts measured by the SF-36 represented by the physical  
34 component summary (PCS) and mental component summary (MCS; Brazier et al.,  
35 1992). For each sub-scale, items are scored using a Likert scale, summed and  
36 transformed on to a scale from 0 (worst health) to 100 (best health; Brazier et  
37 al., 1992). This instrument had adequate reliability with Cronbach's alpha of 0.85  
38 (Kafle-Bhandari et al., 2018).

### 48 **2.5.3 Additional measurements**

49  
50 Demographic and clinical information except the blood test report will be collected  
51 at baseline only. The demographic tool has been designed to collect information  
52 about participants age, gender, residence, marital status, ethnicity, type of family,  
53 educational status, occupation, duration of HD, family history of CKD, access to  
54 HD centre. Clinical information like past medical and surgical history, cause of  
55 kidney failure, details of HD, medication prescription will be accumulated from  
56 hospital records and patient's record. In addition, eGFR, serum creatinine levels,  
57  
58  
59  
60

1  
2  
3 serum albumin levels, blood urea nitrogen, electrolytes, iron studies and  
4 haemoglobin levels will be extracted from the individual's blood test reports.  
5  
6  
7

8 The blood test report will be collected at week 4,8 and 12, which will be aligned  
9 with the fatigue assessment. Table 2 illustrates the timeline for measurement of  
10 outcome and intervention session.  
11  
12  
13

## 14 **2.6 Sample size**

15  
16  
17 G power software™ was used to calculate the sample size by performing the priori  
18 power analysis for an independent group two-tailed t-test. A previous study  
19 (Vadiraja et al., 2017) was which demonstrated a large effect size (Cohen's *d* from  
20 0.90-1.5), was used for the calculation. To have resultant 80% power, a large  
21 effect size of 0.8 and a significance of 0.05, 52 participants will be needed (26 in  
22 each group). As this study is pragmatic cluster randomised controlled trial, and  
23 assuming a moderate intra-cluster coefficient (ICC) of 0.03 and to compensate for  
24 attrition and the possibility of non-normality of data, the calculation is further  
25 inflated by 20% and again 15% respectively. After adjusting for design effect,  
26 attrition and a non-parametric statistic a final sample size of 126 (63 in each  
27 group) is required.  
28  
29  
30  
31  
32  
33  
34  
35  
36  
37  
38  
39

## 40 **2.7 Recruitment strategies and timeframe**

41  
42 Participants will be recruited from the National Kidney Centre. Recruitment of the  
43 participants will be done while they are receiving haemodialysis. Usually, each  
44 dialysis treatment lasts about four hours. The local researcher (Research Assistant  
45 [RA]) will liaise with dialysis nurses and medical doctor who will identify potential  
46 participants. The dialysis nurse who is taking care of the participant will seek  
47 approval from the participant and will ask if the member of research team can  
48 introduce the research to them. Then the RA will approach the participant and  
49 introduce herself, the purpose and the method of the research. The potential  
50 benefits and risks involved with this research will also be explained. The RA will  
51 then assess all inclusion/exclusion criteria and invite them to participate.  
52 Individual invited to participate in the research will be told about what they have  
53  
54  
55  
56  
57  
58  
59  
60

1  
2  
3 to do if they decide to be involved. Potential participants will be then given an  
4 opportunity to ask any questions about the research and read the participants  
5 information sheet before giving written consent. All participants have to complete  
6 the self-reported instruments (Socio-demographic at baseline, FSI at baseline,  
7 week 4, 8 and 12; IOPS-renal, SF-36 and COPM at baseline and week 12). It will  
8 take about 30-40 minutes to complete the questionnaires. Participants will also  
9 have routine blood test at week 4,8 and 12 and the results will be extracted from  
10 the medical records. Participants in the intervention group will have to complete  
11 the activity checklist at baseline and after the booster education session, which  
12 monitor any changes in ways of doing activities of daily livings.  
13  
14  
15  
16  
17  
18  
19  
20  
21

## 2.8 Training to Research Assistants

22 Before starting the project, research assistants will be trained to ensure they are  
23 familiar with the background and aims of the study, the study protocol and  
24 processes, administration of instruments. The training will also include rehearsal  
25 of new or unfamiliar procedures. Research assistants involved in delivering an  
26 intervention will required to attend a day training course after completing the  
27 background reading. The training program will be focused on review of  
28 intervention and practice of the intervention techniques. The training will be  
29 provided by the co-investigator (PhD Student, Ms Sita Sharma) who was involved  
30 in preparing the content of the intervention. They will also have a training manual  
31 that will explain their roles and responsibility, ethical conduct of the research, step by  
32 step instruction to administer the questionnaire and to deliver the intervention.  
33  
34  
35  
36  
37  
38  
39  
40  
41  
42  
43  
44  
45  
46  
47  
48  
49  
50  
51  
52  
53  
54  
55  
56  
57  
58  
59  
60

**Table 2: Timeframe for outcome measurement and intervention sessions**

| <b>Time point (Week)</b> | <b>1</b> | <b>2</b> | <b>3</b> | <b>4</b> | <b>5</b> | <b>6</b> | <b>7</b> | <b>8</b> | <b>9</b> | <b>10</b> | <b>11</b> | <b>12</b> |
|--------------------------|----------|----------|----------|----------|----------|----------|----------|----------|----------|-----------|-----------|-----------|
| <b>Enrolment</b>         |          |          |          |          |          |          |          |          |          |           |           |           |
| Eligibility              | x        |          |          |          |          |          |          |          |          |           |           |           |
| Informed consent         | x        |          |          |          |          |          |          |          |          |           |           |           |
| Allocation               |          |          |          |          |          |          |          |          |          |           |           |           |
| <b>Assessment</b>        |          |          |          |          |          |          |          |          |          |           |           |           |
| Demographic Information  | x        |          |          |          |          |          |          |          |          |           |           |           |
| Clinical Information     | x        |          |          |          |          |          |          |          |          |           |           |           |
| Blood test report        | x        |          |          | x        |          |          |          | x        |          |           |           | x         |
| Fatigue                  | x        |          |          | x        |          |          |          | x        |          |           |           | x         |
| Other renal symptoms     | x        |          |          |          |          |          |          |          |          |           |           | x         |
| Occupational performance | x        |          |          |          |          |          |          |          |          |           |           | x         |
| HRQoL                    | x        |          |          |          |          |          |          |          |          |           |           | x         |
| <b>Intervention</b>      |          |          |          |          |          |          |          |          |          |           |           |           |
| Intervention: EVEREST    | ES1      |          | ES2      |          | ES3      |          |          |          |          |           | B         |           |
| Control: Usual care      | x        | x        | x        | x        | x        | x        | x        | x        | x        | x         | x         | x         |

¶ ES1: Educational session 1; ES2: Educational session 2; ES3: Educational session 3; B: Booster session

## 2.9 Allocation

In this cluster randomised study, the unit of observation is at the level of the individual, and the unit of randomisation is at the level of dialysis day (cluster). Cluster randomisation will be done according to the HD pattern (Sunday/Tuesday/Thursday or Monday/ Wednesday/ Friday). This method of randomisation will avoid possible treatment contamination. Instances of participants attending different dialysis day and being potentially exposed to the intervention will be documented. An equal number of participants will be recruited from each shift to ensure both intervention and control groups have an equal number. Simple randomisation will be used and documented by an independent person, not directly involved in the study.

## 2.10 Blinding

Blinding is an important aspect to minimise the bias in the study, where participants, data collector, investigators or healthcare providers remain unaware of the allocated intervention. It reduces the opportunity for clinicians or researchers to be influenced by knowledge of group allocation (Bhide, Shah, & Acharya, 2018). Due to the nature of the intervention and its pragmatic design, it will not be possible to blind the participants, researcher, dialysis nurse and nephrologist. However, to minimise the risk of bias, research assistants who will collect follow up data will be blinded to group allocation. Nephrologist and dialysis nurses who are responsible for caring for dialysis patients will not be involved in allocation, delivery of the intervention or data collection. They may be aware of the allocation, but this will not affect the outcome of the study.

## 2.11 Data Collection methods

For this project, Redcap application will be used for collection, storage and maintenance of the research data. The Redcap application was chosen as it enables users to contribute via the internet to secure database and allow the investigator to overseeing all data entries. Data will be collected using patient-reported outcome measures via validated instruments and directly from the participant's medical record by the research assistants, who will have been trained



1  
2  
3 prior to commencing the study. All instruments have been used previously in  
4 people receiving HD.  
5  
6  
7  
8  
9

## 10 **2.12 Data Management**

11  
12  
13 All collected data will be managed using an online research data management  
14 planning tool. All paperwork will be stored in a secured box located at nursing  
15 station of National Dialysis Centre in Nepal. Paperwork will then be brought to  
16 Australia using secured courier service and will be kept in a locked filing cabinet  
17 at School of Nursing and Midwifery, Griffith University, Nathan Campus. Electronic  
18 files will be stored on a password-protected computer server. The stored data will  
19 be accessible only for the research team members. All identifiable information  
20 received from participants will be replaced with a unique code and converted to  
21 re-identifiable form. A unique code that links identifying information will be stored  
22 separately in an electronic database only accessible by authorised members of the  
23 research team. Information used in the analyses will remain in the de-identified  
24 format, and other identifying information will not be disclosed in the document or  
25 any research publication. All the collected data will be retained for at least 15  
26 years after the end of the study. After the 15 years of research data at the  
27 institution will be permanently deleted from the computer system, and any hard  
28 copies will be destroyed.  
29  
30  
31  
32  
33  
34  
35  
36  
37  
38  
39  
40  
41  
42  
43

## 44 **2.13 Data Analysis:**

45  
46 First, a coding manual for each outcome measurement variable will be developed.  
47 Responses obtained from the participants on the outcome measures will be scored  
48 prior to entering the IBM SPSS statistics software. After data entry, data will be  
49 cleaned and checked by the researcher to evaluate for missing data, any errors  
50 and invalid response code. Descriptive statistics will be used for all study variables.  
51 Baseline characteristics will be compared for the control and intervention group  
52 using independent *t*-test or Mann Whitney *U* tests for continuous variables while  
53 Chi-square or Fisher Exact tests for categorical variables. The differences between  
54 intervention and control groups in terms of changes in primary and secondary  
55  
56  
57  
58  
59  
60

1  
2  
3 outcome variables will be analysed using generalised linear mixed model according  
4 to intention-to-treat principle. The model will be used to evaluate the effect of an  
5 intervention in different time point and the group-by-time interaction. This model  
6 is designed to adjust the clustered nature of the data and include all randomised  
7 participants in the analysis. For continuous variables, when the normality  
8 assumptions are not met, data will be transformed using log transformation to  
9 normalise the residual. Effectiveness of intervention will be reported using mean  
10 differences with 95% confidence intervals. Significance will be set at  $p < 0.05$ .  
11  
12  
13  
14  
15  
16  
17

### 18 **3. Ethical consideration**

21 Ethical approval will be obtained from the Human Research Committee of the  
22 university prior to the commencement of the study. Approval was already sought  
23 from the research site. Informed written consent will be obtained from each  
24 participant before study commencement. Participants will be informed about  
25 voluntary participation and that there is no foreseeable risk or harm in  
26 participating in the study. Participants will be assured that their confidentiality will  
27 always be maintained. Participants will be given liberty to discontinue participating  
28 in the study without any clarification. All personal data will be coded before  
29 analysis and reported collectively.  
30  
31  
32  
33  
34  
35  
36  
37

#### 38 **3.1 Approach/es to provision of information to participants**

40 A Participant information sheet and consent to participate will be provided to each  
41 participant. The information sheet include will include:  
42  
43

- 44 • Information that participation is voluntary
- 45 • Participants may withdraw from the study at any time
- 46 • Describe how to participate in the study and what to expect from the study
- 47 • Potential benefit and any risk involved with the study
- 48 • Information that participant's data will be treated with full confidentiality  
49 and if published will not be identifiable as theirs
- 50 • Contact detail of research team
- 51
- 52
- 53
- 54
- 55
- 56
- 57
- 58
- 59
- 60

### **3.1.1 Consent**

The researcher will provide verbal overview of the project to ensure all detail have been understood and that participation in the study is voluntary. If participants are willing to participate, they will be asked to provide their consent in written form.

## **4. Results, Outcomes and Future Plans**

### **4.1 Plan for return of results or findings of research to participants**

At the end of the research, participants will be asked if they wish to receive the results of the research. Those who expressed their interest in receiving a copy will be asked to contact their attending nephrologist or member of research team to get a lay summary of the result. This report will contain aggregated data which will not identify individual participants.

### **4.2 Dissemination of and publication of Project Outcome**

It is anticipated that the results of this research project will be published and presented in a variety of forums. Manuscripts will be submitted to peer-reviewed journals and conference presentation will be prepared for both national and international conferences. To protect the privacy of participants, no information will be published that could identify participant in this trial.

### **4.3 Other potential uses of the data at the end of the project**

Data collected in this project will be solely use for the activities previously described.

### **4.4 Plan for sharing and/or future use of data**

No future use of data involved.

## References

- Almutary, H., Bonner, A., & Douglas, C. (2013). Symptom burden in chronic kidney disease: a review of recent literature. *Journal of Renal Care*, 39(3), 140-150. doi:10.1111/j.1755-6686.2013.12022.x
- Almutary, H., Bonner, A., & Douglas, C. (2016). Which patients with chronic kidney disease have the greatest symptom burden? A Comparative study of advanced CKD stage and dialysis modality. *Journal of Renal Care*, 42(2), 73-82. doi:10.1111/jorc.12152
- Anand, S., Bitton, A., & Gaziano, T. (2013). The gap between estimated incidence of end-stage renal disease and use of therapy. *PloS one*, 8(8), e72860. doi:doi.org/10.1371/journal.pone.0072860
- Artom, M., Moss-Morris, R., Caskey, F., & Chilcot, J. (2014). Fatigue in advanced kidney disease. *Kidney International*, 86(3), 497-505. doi:10.1038/ki.2014.86
- Benjamin, O., & Lappin, S. L. (2018). *End-stage renal disease*. In. Retrieved from <https://www.ncbi.nlm.nih.gov/books/NBK499861/>
- Bennett, S., Pigott, A., Beller, E. M., Haines, T., Meredith, P., & Delaney, C. (2016). Educational interventions for the management of cancer-related fatigue in adults. *Cochrane Database for Systematic Reviews*, 11, CD008144. doi:10.1002/14651858.CD008144.pub2
- Bhide, A., Shah, P. S., & Acharya, G. (2018). A simplified guide to randomized controlled trials. *Acta Obstetrica et Gynecologica Scandinavica*, 97(4), 380-387. doi:10.1111/aogs.13309
- Blikman, L. J., Huisstede, B. M., Kooijmans, H., Stam, H. J., Bussmann, J. B., & van Meeteren, J. (2013). Effectiveness of Energy Conservation Treatment in Reducing Fatigue in Multiple Sclerosis: A Systematic Review and Meta-Analysis. *Arch Phys Med Rehabil*, 94(7), 1360-1376. doi:<https://doi.org/10.1016/j.apmr.2013.01.025>
- Blikman, L. J., van Meeteren, J., Twisk, J. W., de Laat, F. A., de Groot, V., Beckerman, H., . . . Bussmann, J. B. (2017). Effectiveness of energy conservation management on fatigue and participation in multiple sclerosis: A randomized controlled trial. *Multiple Sclerosis Journal*, 23(11), 1527-1541.
- Bonner, A., Wellard, S., & Caltabiano, M. (2008). Levels of fatigue in people with ESRD living in far North Queensland. *Journal of Clinical Nursing*, 17(1), 90-98. doi:10.1111/j.1365-2702.2007.02042.x
- Bonner, A., Wellard, S., & Caltabiano, M. (2010). The impact of fatigue on daily activity in people with chronic kidney disease. *Journal of Clinical Nursing*, 19(21-22), 3006-3015. doi:10.1111/j.1365-2702.2010.03381.x
- Bossola, M., Di Stasio, E., Marzetti, E., De Lorenzis, K., Pepe, G., & Vulpio, C. (2018). Fatigue is associated with high prevalence and severity of physical and emotional symptoms in patients on chronic hemodialysis. *International Urology and Nephrology*, 50(7), 1341-1346. doi:10.1007/s11255-018-1875-0
- Bossola, M., Pepe, G., Picca, A., Calvani, R., & Marzetti, E. (2019). Treating symptoms to improve the quality of life in patients on chronic hemodialysis. *International Urology and Nephrology*, 51(5), 885-887. doi:10.1007/s11255-019-02121-5
- Bossola, M., Vulpio, C., & Tazza, L. (2011). Fatigue in Chronic Dialysis Patients. *Semin Dial*, 24(5), 550-555. doi:10.1111/j.1525-139X.2011.00956.x
- Brazier, J. E., Harper, R., Jones, N. M., Cathain, A., Thomas, K. J., Usherwood, T., & Westlake, L. (1992). Validating the SF-36 health survey questionnaire: new outcome measure for primary care. *British Medical Journal*, 305(6846), 160. doi:10.1136/bmj.305.6846.160
- Carswell, A., McColl, M. A., Baptiste, S., Law, M., Polatajko, H., & Pollock, N. (2004). The Canadian Occupational Performance Measure: a research and clinical literature review. *Canadian journal of occupational therapy*, 71(4), 210-222.
- Chambers, S., Bonner, A., Chhabra, S., Healy, H., Ratanjee, S., Kark, A., . . . Hoy, W. (2016). *A feasibility study to track the last 12 months of life in chronic kidney disease patients: Baseline*

- characteristics. Paper presented at the Renal Society of Australasia 44th Annual Conference, Gold Coast, Qld.
- Cicely Saunders Institute. (2016a). How to score IPOS. Retrieved from <https://pos-pal.org/maix/how-to-score.php>
- Cicely Saunders Institute. (2016b). Palliative care outcome scale-IPOS-Renal. Retrieved from <https://pos-pal.org/maix/ipos-renal-in-english.php>
- Cox, K. J., Parshall, M. B., Hernandez, S. H. A., Parvez, S. Z., & Unruh, M. L. (2017). Symptoms among patients receiving in-center hemodialysis: A qualitative study. *Hemodialysis international*, 21(4), 524-533. doi:10.1111/hdi.12521
- Dąbrowska-Bender, M., Dykowska, G., Żuk, W., Milewska, M., & Staniszevska, A. (2018). The impact on quality of life of dialysis patients with renal insufficiency. *Patient preference adherence*, 12, 577-583. doi:doi.org/10.2147/PPA.S156356
- Dahal, A., & Mehta, R. K. (2018). Fatigue experience and coping strategies among cancer patients receiving chemotherapy. *Journal of Nepal Health Research Council*, 16(3), 285-290. doi:doi.org/10.3126/jnhrc.v16i3.21425
- Davison, S. N. (2010). End-of-life care preferences and needs: perceptions of patients with chronic kidney disease. *Clinical Journal of the American Society of Nephrology*, 5(2), 195-204.
- Ekart, R., Ferjuc, A., Furman, B., Gerjevič, Š., Bevc, S., & Hojs, R. (2013). Chronic kidney disease progression to end stage renal disease: a single center experience of the role of the underlying kidney disease. *Ther Apher Dial*, 17(4), 363-367. doi:10.1111/1744-9987.12079
- Hann, D. M., Jacobsen, P. B., Azzarello, L. M., Martin, S. C., Curran, S. L., Fields, K. K., . . . Lyman, G. (1998). Measurement of fatigue in cancer patients: development and validation of the Fatigue Symptom Inventory. *Qual Life Res*, 7(4), 301-310. doi:10.1023/a:1024929829627
- Hariton, E., & Locascio, J. J. (2018). Randomised controlled trials—The gold standard for effectiveness research. *BJOG: An International Journal of Obstetrics and Gynaecology*, 125(13), 1716.
- Hill, N. R., Fatoba, S. T., Oke, J. L., Hirst, J. A., O'Callaghan, C. A., Lasserson, D. S., & Hobbs, F. D. R. (2016). Global Prevalence of Chronic Kidney Disease – A Systematic Review and Meta-Analysis. *PLoS one*, 11(7), e0158765. doi:10.1371/journal.pone.0158765
- Horigan, A. E. (2012). Fatigue in Hemodialysis Patients: A Review of Current Knowledge. *Journal of Pain and Symptom Management*, 44(5), 715-724. doi:<https://doi.org/10.1016/j.jpainsymman.2011.10.015>
- Horigan, A. E., Schneider, S. M., Docherty, S., & Barroso, J. (2013). The experience and self-management of fatigue in patients on hemodialysis. *Nephrology Nursing Journal*, 40(2), 113.
- International Society of Nephrology (ISN). (2019). Dialysis and End-Stage Kidney Disease. Retrieved from <https://www.theisn.org/focus/eskd-focus>
- Jha, V. (2013). Current status of end-stage renal disease care in India and Pakistan. *Kidney international supplements*, 3(2), 157-160. doi:<https://doi.org/10.1038/kisup.2013.3>
- Ju, A., Unruh, M. L., Davison, S. N., Dapuelto, J., Dew, M. A., Fluck, R., . . . O'Donoghue, D. (2018). Patient-reported outcome measures for fatigue in patients on hemodialysis: a systematic review. *American journal of kidney diseases*, 71(3), 327-343.
- Kafle-Bhandari, B., Pradhan, R. R., Pathak, R., Poudyal, S., Paudyal, M. B., Sharma, S., & Khadga, P. K. (2018). Assessment of Validity of SF 36 Questionnaire Using Nepali Language to Determine Health-related Quality of Life in Patients with Chronic Liver Disease: A Pilot Study. *Cureus*, 10(7), e2925-e2925. doi:10.7759/cureus.2925
- Kao, Y.-H., Huang, Y.-C., Chen, P.-Y., & Wang, K.-M. (2012). The effects of exercise education intervention on the exercise behaviour, depression, and fatigue status of chronic kidney disease patients. *Health Education*, 112(6), 472-484. doi:<https://doi.org/10.1108/09654281211275827>
- Kraus, M. A., Fluck, R. J., Weinhandl, E. D., Kansal, S., Copland, M., Komenda, P., & Finkelstein, F. O. (2016). Intensive Hemodialysis and Health-Related Quality of Life. *American journal of kidney diseases*, 68(5), S33-S42. doi:10.1053/j.ajkd.2016.05.023

- 1  
2  
3 Law, M., Baptiste, S., McColl, M., Opzoomer, A., Polatajko, H., & Pollock, N. (1990). The Canadian  
4 occupational performance measure: an outcome measure for occupational therapy. *Canadian*  
5 *journal of occupational therapy*, 57(2), 82-87.
- 6 Leonberg-Yoo, A. K., & Weiner, D. E. (2016). Epidemiology of End-Stage Renal Disease. In C. C. Magee,  
7 J. K. Tucker, & A. K. Singh (Eds.), *Core Concepts in Dialysis and Continuous Therapies* (pp. 3-  
8 13). Boston, MA: Springer US.
- 9 Levey, A. S., Eckardt, K.-U., Dorman, N. M., Christiansen, S. L., Hoorn, E. J., Ingelfinger, J. R., . . .  
10 Palevsky, P. M. (2020). Nomenclature for kidney function and disease: report of a kidney  
11 disease: improving global outcomes (KDIGO) consensus conference. *Kidney international*.
- 12 Lorenz, E., Köpke, S., Pfaff, H., & Blettner, M. (2018). Cluster-Randomized Studies: Part 25 of a Series  
13 on Evaluating Scientific Publications. *Deutsches Ärzteblatt International*, 115(10), 163-168.
- 14 Moskovitch, J. T., Mount, P. F., & Davies, M. R. P. (2019). Changes in Symptom Burden in Dialysis  
15 Patients Assessed Using a Symptom-Reporting Questionnaire in Clinic. *Journal of Palliative*  
16 *Care*, 1-7. doi:10.1177/0825859719827315
- 17 Murphy, E. L., Murtagh, F. E., Carey, I., & Sheerin, N. S. (2009). Understanding symptoms in patients  
18 with advanced chronic kidney disease managed without dialysis: use of a short patient-  
19 completed assessment tool. *Nephron Clinical Practice*, 111(1), c74-c80.
- 20 Packer, T. L., Brink, N., & Sauriol, A. (1995). *Managing fatigue : a six-week course for energy*  
21 *conservation*. Tucson, Ariz: Therapy Skill Builders.
- 22 Picariello, F., Moss-Morris, R., Macdougall, I. C., & Chilcot, J. (2016). The role of psychological factors  
23 in fatigue among end-stage kidney disease patients: a critical review. *Clinical Kidney Journal*,  
24 10(1), 79-88. doi:10.1093/ckj/sfw113
- 25 Raj, R., Ahuja, K., Frandsen, M., Murtagh, F. E., & Jose, M. (2018). Validation of the IPOS-renal symptom  
26 survey in advanced kidney disease: a cross-sectional study. *Journal of Pain and Symptom*  
27 *Management*, 56(2), 281-287.
- 28 Senanayake, S., Gunawardena, N., Palihawadana, P., Bandara, P., Haniffa, R., Karunarathna, R., &  
29 Kumara, P. (2017). Symptom burden in chronic kidney disease; a population based cross  
30 sectional study. *BMC Nephrology*, 18(1), 228. doi:[https://doi.org/10.1186/s12882-017-0638-](https://doi.org/10.1186/s12882-017-0638-y)  
31 [y](https://doi.org/10.1186/s12882-017-0638-y)
- 32 Sharma, S., Green, T., Alexander, K. E., & Bonner, A. (2020). Educational or behavioural interventions  
33 for symptoms and health-related quality of life in adults receiving haemodialysis: A systematic  
34 review. *Journal of Renal Care*. doi:10.1111/jorc.12329
- 35 Sousa, V. D., & Rojjanasirrat, W. (2011). Translation, adaptation and validation of instruments or scales  
36 for use in cross-cultural health care research: a clear and user-friendly guideline. *Journal of*  
37 *Evaluation in Clinical Practice*, 17(2), 268-274. doi:10.1111/j.1365-2753.2010.01434.x
- 38 Vadiraja, H., Rao, R. M., Nagarathna, R., Nagendra, H., Patil, S., Diwakar, R. B., . . . Ajaikumar, B. (2017).  
39 Effects of yoga in managing fatigue in breast cancer patients: a randomized controlled trial.  
40 *Indian Journal of Palliative Care*, 23(3), 247.  
41 doi:[https://dx.doi.org/10.4103%2FIJPC.IJPC\\_95\\_17](https://dx.doi.org/10.4103%2FIJPC.IJPC_95_17)
- 42 Webster, A. C., Nagler, E. V., Morton, R. L., & Masson, P. (2017). Chronic Kidney Disease. *The Lancet*,  
43 389(10075), 1238-1252. doi:[https://doi.org/10.1016/S0140-6736\(16\)32064-5](https://doi.org/10.1016/S0140-6736(16)32064-5)
- 44 Yoong, S. L., Wolfenden, L., Clinton-McHarg, T., Waters, E., Pettman, T. L., Steele, E., & Wiggers, J.  
45 (2014). Exploring the pragmatic and explanatory study design on outcomes of systematic  
46 reviews of public health interventions: a case study on obesity prevention trials. *Journal of*  
47 *Public Health*, 36(1), 170-176. doi:10.1093/pubmed/fdu006 %J Journal of Public Health
- 48 Zalai, D., & Bohra, M. (2016). Fatigue in chronic kidney disease: Definition, assessment and treatment.  
49 *CANNT Journal*, 26(1), 39-44.
- 50  
51  
52  
53  
54  
55  
56  
57  
58  
59  
60

# BMJ Open

## Energy Conservation Education Intervention for People with End-stage Kidney Disease Receiving Haemodialysis (EVEREST): protocol for a cluster randomised control trial

|                                 |                                                                                                                                                                                                                                                                                                                                                                                                                                                                                                                                                                                                       |
|---------------------------------|-------------------------------------------------------------------------------------------------------------------------------------------------------------------------------------------------------------------------------------------------------------------------------------------------------------------------------------------------------------------------------------------------------------------------------------------------------------------------------------------------------------------------------------------------------------------------------------------------------|
| Journal:                        | <i>BMJ Open</i>                                                                                                                                                                                                                                                                                                                                                                                                                                                                                                                                                                                       |
| Manuscript ID                   | bmjopen-2021-056544.R1                                                                                                                                                                                                                                                                                                                                                                                                                                                                                                                                                                                |
| Article Type:                   | Protocol                                                                                                                                                                                                                                                                                                                                                                                                                                                                                                                                                                                              |
| Date Submitted by the Author:   | 11-Dec-2021                                                                                                                                                                                                                                                                                                                                                                                                                                                                                                                                                                                           |
| Complete List of Authors:       | Sharma, Sita; Griffith University, School of Nursing and Midwifery; Griffith University Menzies Health Institute Queensland<br>Alexander, Kimberly ; Queensland University of Technology, School of Nursing<br>Green, Theresa; The University of Queensland, ; Metro North Hospital and Health Service, Surgical Treatment and Rehabilitation Service<br>Wu, Min-Lin (Winnie); Griffith University, School of Nursing and Midwifery; Griffith University Menzies Health Institute Queensland<br>Bonner, Ann; Griffith University, Nursing; Royal Brisbane and Women's Hospital, Kidney Health Service |
| <b>Primary Subject Heading</b>: | Renal medicine                                                                                                                                                                                                                                                                                                                                                                                                                                                                                                                                                                                        |
| Secondary Subject Heading:      | Renal medicine, Urology, Nursing                                                                                                                                                                                                                                                                                                                                                                                                                                                                                                                                                                      |
| Keywords:                       | Dialysis < NEPHROLOGY, End stage renal failure < NEPHROLOGY, Chronic renal failure < NEPHROLOGY                                                                                                                                                                                                                                                                                                                                                                                                                                                                                                       |
|                                 |                                                                                                                                                                                                                                                                                                                                                                                                                                                                                                                                                                                                       |

SCHOLARONE™  
Manuscripts

**TITLE PAGE**

**FULL TITLE:** Energy Conservation Education Intervention for People with End-stage Kidney Disease Receiving Haemodialysis (EVEREST): protocol for a cluster randomised control trial

**AUTHORS**

Sita Sharma<sup>1,2</sup>, PhD Candidate

Kimberly E. Alexander<sup>3</sup>, Associate Professor

Theresa Green<sup>4,5</sup>, Professor

Min-Lin (Winnie) Wu<sup>1,2</sup>, Lecturer

Ann Bonner<sup>1,2,6</sup>, Professor

**INSTITUTIONAL AFFILIATIONS:**

<sup>1</sup> School of Nursing and Midwifery, Griffith University, Nathan, Australia

<sup>2</sup> Menzies Health Institute Queensland, Griffith University, Brisbane, Queensland, Australia

<sup>3</sup> School of Nursing, Queensland University of Technology, Brisbane, Australia

<sup>4</sup> School of Nursing, Midwifery and Social Work, University of Queensland, Brisbane, Australia

<sup>5</sup> Surgical Treatment & Rehabilitation Service, Metro North Hospital and Health Service, Brisbane, Australia

<sup>6</sup> Kidney Health Service, Royal Brisbane and Women's Hospital, Brisbane, Australia.

**Corresponding author:**

Sita Sharma, School of Nursing and Midwifery and Menzies Health Institute Queensland, Griffith University, Building N48, 170 Kessels Road, Nathan, QLD, 4111, Australia. E-mail:

[sita.sharma@griffithuni.edu.au](mailto:sita.sharma@griffithuni.edu.au)



## Abstract

**Introduction:** Multiple symptoms occur in people with kidney failure receiving haemodialysis (HD) and these symptoms have a negative impact on health-related quality of life (HRQoL). Fatigue, the most common symptom, is debilitating and difficult to manage. Educational interventions involving energy conservation strategies are helpful in reducing fatigue, however the effectiveness of energy conservation has not been previously studied in those receiving HD. The aim of this study is to evaluate the effectiveness of an energy conservation education intervention for people with end-stage kidney disease receiving HD (EVEREST trial).

**Methods and analysis:** A pragmatic cluster randomised controlled trial with repeated measure will be used. One hundred and twenty-six participants from tertiary level dialysis centre will be cluster randomised to the intervention and control group according to HD treatment day. The intervention group will receive usual care along with a structured energy conservation education (ECE) program over 12 weeks comprising three individual face-to-face educational intervention sessions, one booster session, and a booklet. The control group will receive usual care from their healthcare providers and a booklet at the end of the study. The primary outcome is fatigue, and the secondary outcomes are other kidney symptoms, occupational performance, and health-related quality of life. Intention-to-treat analysis will occur and will include a change in primary and secondary outcomes.

**Ethics and dissemination:** Ethical approval has been obtained from the Human Research Committee of the Griffith University and Nepal Health Research Council. The results of this research will be published and presented in a variety of forums.

**Trial registration number:** NCT04360408; Pre-results

### Strengths and limitations of this study

- This study used cluster randomisation according to the day of HD to prevent treatment contamination between groups.
- The intervention material was developed to be simple and easily understood by those with limited education.
- Participants are recruited from one haemodialysis centre in Nepal.
- This study is focused on those receiving haemodialysis limiting generalisability to this population.

## Introduction

Chronic kidney disease (CKD) is both a major global public health problem and contributor to the overall burden of non-communicable disease,<sup>1</sup> affecting about 13% of the global population.<sup>2</sup> The internationally agreed definition of CKD is an estimated glomerular filtration rate (eGFR)  $< 60\text{ml}/\text{min}/1.73\text{m}^2$  for three months or longer.<sup>3</sup> Chronic kidney disease is then classified into five grades based on eGFR.<sup>4</sup> When  $\text{eGFR} < 15\text{ml}/\text{min}/1.73\text{m}^2$  then the term kidney failure (previously ESKD) is used.<sup>4</sup> While there is no kidney registry in Nepal, the prevalence of kidney failure is approximately 2,900.<sup>5</sup> Haemodialysis (HD) is the most common modality of treatment for those with kidney failure and usually prescribed three times per week, with a duration of 4 - 5 hours per session.<sup>6</sup> It can be performed either in-centre in a hospital or a satellite unit or at home.<sup>7</sup> This treatment impacts on almost all aspects of daily life leading to decreased health-related quality of life (HRQoL)<sup>8</sup> including maintaining employment and being able to undertake routine social activities<sup>9</sup> as well as affecting family members.<sup>10, 11</sup>

Physical and psychological symptoms are common in this population and may be related to the underlying pathologies, presence of multiple co-morbidities, accumulation of uraemic toxins or fluids, medication side effects, and inadequacy of dialysis.<sup>12</sup> Several studies have described symptom burden in this population.<sup>12-16</sup> Almutary et al, who compared those not on dialysis with those receiving either HD or peritoneal dialysis, reported that both symptom prevalence and severity was highest in those receiving HD, and that about 85% reported being fatigued.<sup>13</sup>

Fatigue is an overwhelming subjective experience of discomfort associated with physical and mental exhaustion.<sup>17</sup> Fatigue in people with kidney failure negatively impacts individuals' day to day activities,<sup>18, 19</sup> HRQoL,<sup>20</sup> increases hospitalisations and mortality.<sup>21</sup> Various factors have been associated with fatigue in kidney failure such as demographic characteristics,<sup>22</sup> elevated

1  
2  
3 urea levels, anaemia, depression, anxiety, and sleep disturbances.<sup>22, 23</sup> Medication side effects  
4 and HD treatment-related factors like dialysis inadequacy and excessive ultrafiltration have  
5  
6 been associated with fatigue.<sup>24-26</sup>  
7  
8  
9

10  
11  
12 Managing fatigue is essential in improving HRQoL for individuals on HD. It can be argued  
13 that adults receiving HD can benefit from symptom self-management techniques to reduce  
14 fatigue and other kidney failure symptoms.<sup>27</sup> Previous research has shown that exercise could  
15 reduce fatigue;<sup>22, 28</sup> however barriers such as having sufficient available expert staff, dialysis-  
16 related fatigue, comorbid conditions, and lack of motivation may limit the ability for some to  
17 be actively involved in exercise.<sup>29</sup> Educational interventions are believed to improve cancer-  
18 related fatigue<sup>30</sup> and there is some evidence to support this in earlier stages of CKD.<sup>31</sup>  
19 Likewise, education about energy conservation is another approach to manage fatigue that has  
20 shown a significant reduction in fatigue in other chronic diseases, including multiple sclerosis<sup>32</sup>  
21 and cancer.<sup>33, 34</sup> However, its effectiveness is yet to be tested in the HD population.  
22  
23  
24  
25  
26  
27  
28  
29  
30  
31  
32  
33  
34  
35  
36  
37

38 In a systematic review, Blikman et al.<sup>32</sup> included six interventional studies which examined  
39 the effects of energy conservation management (ECM) for fatigue and HRQoL in people with  
40 multiple sclerosis (MS). Four studies included in this review used an ECM intervention  
41 program based on Packers' "Managing Fatigue" course and two were guided by the MS fatigue  
42 guidelines. Interventions in these studies were delivered in group format and face-to-face  
43 except one study<sup>35</sup> where the intervention was delivered via teleconference. Meta-analysis of  
44 two studies<sup>35, 36</sup> included in this review showed that an ECM intervention was more effective  
45 than no intervention in reducing the impact of fatigue measured by fatigue impact scale (FIS).<sup>32</sup>  
46 There was a improvement in the FIS subscale significantly on the cognitive subscale (MD = -  
47 2.91; 95% CI -4.32 to -1.50), the physical subscale (MD = -2.99; 95% CI -4.47 to -1.52), and  
48 the psychological subscale (MD = -6.05; 95% CI -8.72 to -3.37).<sup>32</sup> The same study also  
49  
50  
51  
52  
53  
54  
55  
56  
57  
58  
59  
60

1  
2  
3 revealed that an ECM improved three domains of HRQoL, namely role physical (MD = 17.26;  
4 95% CI 9.69 to 24.84), social functioning (MD = 6.91; 95% CI 1.32 to 12.49), and mental  
5 health (MD = 5.55; 95% CI 2.27 to 8.83). Another study evaluated the effect of energy  
6 conservation strategies in persons with breast cancer experiencing fatigue.<sup>33</sup> In this study, the  
7 intervention was delivered face-to-face in the form of small group discussion. Duration of each  
8 session was 90 minutes and sessions were conducted weekly for 5 weeks.<sup>33</sup> The result of this  
9 study showed that energy conservation strategies significantly reduced cancer-related fatigue  
10 in persons with breast cancer over an 8 week follow-up period ( $F = 69.8, p < 0.001$ ).<sup>33</sup>  
11  
12  
13  
14  
15  
16  
17  
18  
19  
20  
21  
22  
23

24 Despite fatigue being highly prevalent in those receiving HD, a recent systematic review did  
25 not find any interventional studies that used an educational approach for self-management to  
26 reduce symptoms and improve HRQoL in people undergoing HD.<sup>37</sup> Thus, this study aims to  
27 evaluate the effectiveness of an energy conservation education intervention for people with  
28 end-stage kidney disease receiving haemodialysis (EVEREST trial) in Nepal.  
29  
30  
31  
32  
33  
34  
35  
36  
37

### 38 **Research hypotheses**

39 People with kidney failure on HD who receive energy conservation education (ECE) program  
40 and usual care are more likely to:  
41  
42

43 H1: have reduced fatigue severity, frequency and perceived interference compared to people  
44 undergoing HD who received only usual care.  
45  
46

47 H2: have reduced other kidney failure symptoms score compared to people undergoing HD  
48 who received only usual care.  
49  
50

51 H3: have improved occupational performance and satisfaction compared to people undergoing  
52 HD who received only usual care.  
53  
54

55 H4: have improved HRQoL compared to people undergoing HD who received only usual  
56 care.  
57  
58  
59  
60

## Methods and analysis

### Study design

A pragmatic cluster randomised controlled trial (CRT [pCRT]) design with outcome assessor blinded, with 1:1 randomisation will be used. A pragmatic design attempts to find an answer to whether an intervention will work under usual conditions in a real clinical setting where few exclusion criteria are applied.<sup>38</sup> To avoid possible treatment contamination, because participants on the same HD day may interact with each other as they spend approximately four hours in close proximity to each other during dialysis, a cluster design is used with cluster cohorts based on the day of dialysis. The CONSORT flow diagram in Figure 1 presents the study design.

### Study setting

The study will be conducted at the National Kidney Centre (NKC), Kathmandu, Nepal. The NKC is the non-profit, non-governmental organisation with the largest HD treatment facility in Nepal. The NKC provides HD treatment for around 240 people a month. Haemodialysis is free to all patients as mandated by the Ministry of Health and Population, Nepal although medications and routine blood tests require patients to fund.

### Sample size

G power software™ was used to calculate the sample size by performing the priori power analysis for an independent group two-tailed t-test. The sample size was calculated based on a large effect size (Cohen's *d* from 0.90 - 1.5) taken from previous study in a breast-cancer patients on management of fatigue (measured with fatigue symptom inventory [FSI]) with yoga intervention.<sup>39</sup> To have resultant 80% power, an effect size of 0.8 and a significance of 0.05, 52 participants are needed (26 in each group). As this study uses a cluster design, and assuming

1  
2  
3 a moderate intra-cluster coefficient (ICC) of 0.03, the sample size is adjusted to compensate  
4 for design effect. To compensate for attrition and to avoid the possibility of non-normality of  
5 data, the calculation is further inflated by 20% and again 15% respectively. After adjusting for  
6 these, a final sample size of 126 (63 in each group) is required.  
7  
8  
9  
10  
11  
12  
13

### 14 **Eligibility criteria**

15  
16  
17 Participants diagnosed with kidney failure and undergoing HD for  $\geq 3$  months, aged 18 years  
18 and above, able to speak and understand Nepali language, and willing to participate, will be  
19 included in this study. Participants who are in earlier grades of CKD or not dependent on HD,  
20 those acutely ill, diagnosed with cognitive impairment and those who are not willing to  
21 participate will be excluded. Participants may be withdrawn from the study at any time due to  
22 a safety concern, if they became sick or if unable to adhere with the trial procedure.  
23  
24  
25  
26  
27  
28  
29  
30  
31  
32

### 33 **Study intervention**

#### 34 ***Intervention group***

35  
36  
37 The intervention group will receive both usual care from their healthcare providers and the 12  
38 weeks ECE program. The ECE program teaches individuals to recognise and modify their daily  
39 activities to reduce fatigue by analysing their daily work, home and leisure activities.<sup>40</sup> This  
40 program helps to develop a positive attitude towards decision-making and the maximum use  
41 of available energy.<sup>32</sup> It is designed to reduce the frequency, severity and impact of fatigue,  
42 increase a person's use of energy-conservation strategies and improve their confidence level  
43 and their ability to manage fatigue.<sup>32</sup> Seven energy conservation strategies adopted from the  
44 “Managing Fatigue” course developed by Packer et al.<sup>41</sup> form the content of the ECE program  
45 (see Table 1); each strategy is adapted to fit with the daily activities of Nepali people.  
46  
47  
48  
49  
50  
51  
52  
53  
54  
55  
56  
57  
58  
59  
60

**Table 1**  
**Summary of the content of the ECE Program**

| Session               | Goal and objectives                                                                                                                                                                                                                                                                                                                                                                                                                                                                                                                                                               | Topics                                                                                                                                                                                                                                                                                                                                                                                                                          | Duration      | Teaching methods                                                                                                              |
|-----------------------|-----------------------------------------------------------------------------------------------------------------------------------------------------------------------------------------------------------------------------------------------------------------------------------------------------------------------------------------------------------------------------------------------------------------------------------------------------------------------------------------------------------------------------------------------------------------------------------|---------------------------------------------------------------------------------------------------------------------------------------------------------------------------------------------------------------------------------------------------------------------------------------------------------------------------------------------------------------------------------------------------------------------------------|---------------|-------------------------------------------------------------------------------------------------------------------------------|
| Session 1<br>(Week 1) | <p><u>Goal:</u> The goal of this session is to provide information about fatigue in kidney failure, its causes, and energy conservation strategies and its application in daily activities.</p> <p><u>Objectives:</u></p> <ul style="list-style-type: none"> <li>• To set a friendly environment and develop a trusting interpersonal relationship</li> <li>• To give information about fatigue, its causes</li> <li>• To give information about energy conservation, energy conservation strategy 1 and its application in daily activities</li> </ul>                           | <ul style="list-style-type: none"> <li>• Fatigue in kidney failure</li> <li>• Causes of fatigue</li> <li>• Introduction of energy conservation</li> <li>• Energy conservation strategies and its application in daily activities <ul style="list-style-type: none"> <li>✓ Strategy 1: Organising daily routine and evaluating priorities</li> </ul> </li> <li>• Summary</li> </ul>                                              | 30-45 minutes | <p>A face-to-face session with the help of recorded PowerPoint on the laptop</p> <p>Question and answer</p> <p>Discussion</p> |
| Session 2<br>(Week 3) | <p><u>Goal:</u> The goal of this session is to provide information about energy conservation strategies 2, 3, 4 and 5, and there application in daily activities.</p> <p><u>Objectives:</u></p> <ul style="list-style-type: none"> <li>• To set a friendly environment and prepare participant for educational session</li> <li>• To revise the content of session 1</li> <li>• To provide opportunity to ask question about previous session</li> <li>• To give information about energy conservation strategies 2, 3, 4, 5 and examples relevant to daily activities</li> </ul> | <ul style="list-style-type: none"> <li>• Revision of previous session</li> <li>• Energy conservation strategies and its application in daily activities <ul style="list-style-type: none"> <li>✓ Strategy 2: Simplifying the everyday task</li> <li>✓ Strategy 3: Organising station for activities and using the energy-efficient appliances</li> <li>✓ Strategy 4: Pacing activities and avoid rushing</li> </ul> </li> </ul> | 30 minutes    | <p>A face-to-face session with the help of recorded PowerPoint on the laptop</p> <p>Question and answer</p>                   |



|                                           |                                                                                                                                                                                                                                                                                                                                                                                                                                                                                                                                                                                                      |                                                                                                                                                                                                                                                                                                                    |               |                                                                                                                            |
|-------------------------------------------|------------------------------------------------------------------------------------------------------------------------------------------------------------------------------------------------------------------------------------------------------------------------------------------------------------------------------------------------------------------------------------------------------------------------------------------------------------------------------------------------------------------------------------------------------------------------------------------------------|--------------------------------------------------------------------------------------------------------------------------------------------------------------------------------------------------------------------------------------------------------------------------------------------------------------------|---------------|----------------------------------------------------------------------------------------------------------------------------|
|                                           |                                                                                                                                                                                                                                                                                                                                                                                                                                                                                                                                                                                                      | <ul style="list-style-type: none"> <li>✓ Strategy 5: The value of rest and having rest periods during the day</li> <li>• Summary</li> </ul>                                                                                                                                                                        |               | Discussion                                                                                                                 |
| Session 3<br>(Week 5)                     | <p><u>Goal:</u> The goal of this session is to provide information about energy conservation strategies 6 and 7 and their application to daily activities.</p> <p><u>Objectives:</u></p> <ul style="list-style-type: none"> <li>• To set a friendly environment and prepare participant for educational session</li> <li>• To revise session 2</li> <li>• To identify any concern about previous session</li> <li>• To provide opportunity to ask question about previous sessions</li> <li>• To give information about energy conservation 6, 7 and its application in daily activities.</li> </ul> | <ul style="list-style-type: none"> <li>• Revision of previous session</li> <li>• Energy conservation strategies and its application in daily activities</li> <li>✓ Strategy 6: Communicating personal needs to others</li> <li>✓ Strategy 7: Using proper body mechanics and posture</li> <li>• Summary</li> </ul> | 30 minutes    | <p>A face-to-face session with the help of recorded PowerPoint on the laptop</p> <p>Question and answer<br/>Discussion</p> |
| Session 4<br>Booster session<br>(Week 10) | <p><u>Goal:</u> The goal of this session is to revise the content of all sessions with the help of educational booklet.</p> <p><u>Objectives:</u></p> <ul style="list-style-type: none"> <li>• To set a friendly environment and prepare participant for educational session</li> <li>• To provide opportunity to ask question about previous sessions</li> <li>• To revise session 1, 2 and 3</li> <li>• To reflect on progress in meeting the objectives of each session</li> </ul>                                                                                                                | <ul style="list-style-type: none"> <li>• Revision of previous session</li> <li>• Summarise the content of the booklet</li> <li>✓ Introduction of fatigue, energy conservation, its strategies and application in daily activities</li> </ul>                                                                       | 30-45 minutes | <p>A face-to-face session with the help of booklet</p> <p>Question and answer<br/>Discussion</p>                           |

1  
2  
3 The ECE program is guided by Symptom management theory (SMT) as the theoretical  
4 framework. This theory accounts for the person, health/illness, the environment, and includes  
5 the symptom experience, symptom management strategies and outcomes.<sup>42</sup> Symptom  
6 management theory is built on the premise that a symptom experience is based on how an  
7 individual perceives and responds to the symptom.<sup>43</sup> Symptom management strategies used by  
8 individuals to delay a negative outcome of the symptom experience can be targeted by  
9 appropriate intervention strategies. The theory also explains that outcomes (e.g., functional  
10 status, self-care, HRQoL) may be altered by the symptom experience and/or symptom  
11 management strategies. The dynamic interaction between each dimension of SMT provides  
12 explicit and testable relationships among these dimensions. In this study, the relationship  
13 between a person's fatigue experience and other kidney symptoms, the ECE program, and  
14 outcomes including status of fatigue and other kidney symptoms, HRQoL, and occupational  
15 performance will be tested using this theory.  
16  
17  
18  
19  
20  
21  
22  
23  
24  
25  
26  
27  
28  
29  
30  
31  
32  
33  
34

### 35 *Face-to-face education session*

36  
37 Four face-to-face educational sessions will be undertaken during participants' regular HD  
38 treatment. Sessions will be in weeks 1, 3, and 5, followed by a booster session in week 10.  
39 Each session will be 30 - 45 minutes in duration. Research assistants (RAs; nurses trained by  
40 the principal researcher) will deliver the intervention to avoid information bias. Recorded  
41 PowerPoint presentations in simple Nepali language will be displayed on a laptop. At the end  
42 of each session, RAs will inform the participants of the date for the next session. This simple  
43 strategy will assist with participant retention in the study.  
44  
45  
46  
47  
48  
49  
50  
51  
52  
53  
54  
55

### 56 *Educational booklet*

57  
58 Educational sessions will be supplemented by a booklet designed to be understood by an  
59 individual with minimal literacy to support a better understanding of fatigue in kidney failure,  
60

1  
2  
3 causes of fatigue, energy conservation strategies and their application in daily activities. Simple  
4 text information, along with informative images, will be used to assist participants to  
5 understand and apply the energy conservation strategies.  
6  
7  
8  
9

### 10 11 12 ***Control group***

13  
14 Participants randomised to the control group will receive usual care (standard care with no  
15 formalised, structured, or tailored interventions to reduce symptom/s) from their healthcare  
16 providers. Participants in the control group will receive an ECE program booklet at week 12  
17 once the study is completed.  
18  
19  
20  
21  
22  
23

### 24 25 26 **Outcomes**

#### 27 28 **Primary outcome**

##### 29 30 *Fatigue*

31  
32 The primary outcome of the study is fatigue, which is measured at Time 0 = baseline, Time 1  
33 = week 4, Time 2 = week 8 and Time 3 = week 12 using the Fatigue Symptom Inventory  
34 (FSI).<sup>44</sup> This self-report instrument is comprised of 14 items assessing the frequency, severity,  
35 daily pattern of fatigue and its perceived interference with quality of life. Fatigue severity is  
36 measured by an 11-point item scale (0 = not at all fatigue, 10 = as fatigued as I could be) that  
37 assesses least, average, and most fatigue in the past week and right now. A composite fatigue  
38 score (FSI composite) will be derived by calculating the average across the three severity items.  
39 Frequency is measured as the number of days in the past week (0 - 7) that participants felt  
40 fatigue, as well as the percentage of each day on average they felt fatigued (0% = none of the  
41 day; 100% = the entire day). Perceived interference, which assesses the degree to which fatigue  
42 in the past week was judged to interfere with the general level of activity, ability to bathe and  
43 dress, normal work activity, ability to concentrate, relations with others, enjoyment of life, and  
44 mood, is measured on separate 11-point scales (0 = no interference; 10 = extreme interference).  
45  
46  
47  
48  
49  
50  
51  
52  
53  
54  
55  
56  
57  
58  
59  
60

1  
2  
3 These interferences ratings can be summed (and averaged) to obtain a total perceived  
4 interference score. The final item provides qualitative information about possible diurnal  
5 variation in the daily experience of fatigue. The FSI has been used previously in the study  
6 kidney failure population.<sup>45</sup> This instrument was translated into the Nepali language, and has a  
7 Cronbach's alpha of 0.79.<sup>46</sup>  
8  
9  
10  
11  
12  
13  
14  
15  
16

### 17 **Secondary outcomes**

18  
19 Secondary outcomes are other kidney symptoms, occupational performance, and HRQoL,  
20 which will be measured at Time 0 (Baseline) and Time 3 (Week 12).  
21  
22  
23  
24  
25

#### 26 *Other kidney symptoms*

27  
28 Other kidney symptoms will be measured using the Integrated Palliative Outcome Scale renal  
29 (IPOS-renal); designed to be used in chronic kidney disease population including those  
30 receiving HD. This self-report instrument is short (11-items) making it quick and easy to  
31 administer. It measures the most common symptoms experienced by people with kidney  
32 disease; additional items such as information needs, practice issues; and anxiety of family.<sup>47, 48</sup>  
33 Question 2 of this instrument assesses 15 specific symptoms for each of these items, with  
34 responses rated 0 (no symptoms) to 4 (overwhelmingly).<sup>49</sup> Questions 3-9 assess the  
35 psychological, spiritual, communication, and practical problem or concern, for each of these,  
36 with responses also rated 0 - 4. Questions 1 and 11 are not scored. The overall IPOS-renal score  
37 can range from 0 to 92. The IPOS-renal demonstrates good reliability and validity;<sup>50</sup> however,  
38 it is not available in Nepali language. Prior to starting the study, the instrument was translated  
39 into Nepali. The process recommended by Sousa and Rojjanasrirat was used to translate the  
40 instrument in English to the Nepali language.<sup>51</sup> A content validity index will be calculated  
41 while reliability of the instrument will be tested in a representative sample of HD participants  
42 in this study.  
43  
44  
45  
46  
47  
48  
49  
50  
51  
52  
53  
54  
55  
56  
57  
58  
59  
60

### *Occupational performance*

Occupational performance is measured by the Nepali version of the Canadian occupational performance measure (COPM).<sup>52</sup> This instrument is designed to identify changes in occupational performance over a period of time. Administration of the COPM requires five steps. First, the individual identifies and prioritises everyday problems that restrict or impact the performance in the areas of self-care, productivity, and leisure. Second, the identified problems are rated in terms of their importance on a scale of 1 (not important at all) to 10 (extremely important). Third, the five most urgent or important problems are identified on which to focus during the intervention. Fourth, the individual rates their performance and satisfaction. Both scales range from 1-10, with higher values indicating better performance and greater satisfaction. After an appropriate interval (Week 12 in this study), performance and satisfaction are reassessed and calculated to measure changes overtime. Cronbach's alpha of this instrument for performance score was 0.89, and for the satisfaction, the score was 0.88.<sup>53</sup>

### *Health-related quality of life*

Health-related quality of life is measured using the Nepali version of the SF-36 questionnaire.<sup>54</sup> The SF-36 contains 36 multidimensional questions and has eight sub-scales: physical functioning, role physical, role emotional, energy/fatigue, emotional wellbeing, social functioning, pain and general health.<sup>55</sup> There are two distinct concepts measured by the SF-36, represented by the physical component summary (PCS) and mental component summary (MCS).<sup>55</sup> For each sub-scale, items are scored using a likert scale, summed and transformed on to a scale from 0 (worst health) to 100 (best health).<sup>55</sup> This instrument has good reliability with Cronbach's alpha of 0.85.<sup>54</sup>

### Additional measurements

Demographic and clinical information, except blood results, will be collected at baseline only.

The demographic tool has been designed to collect information about participants age, gender, residence, marital status, ethnicity, religion, type of family, educational status, occupation, and income. Kidney characteristics such as CKD cause and duration, family history of CKD, duration and detail of HD treatment, past medical and surgical history, current medications will be extracted from hospital records. In addition, serum albumin, electrolytes, and haemoglobin levels as well as iron studies results will be extracted from the individual's reports. These results will be collected at baseline then weeks 4, 8 and 12; aligned with assessment of fatigue. The intervention group will record levels of activity while at home prior to starting the ECE program and then at week 12. Table 2 illustrates the timeline for measurement of outcomes and intervention sessions.

**Table 2**  
**Timeline for outcome measurement and intervention sessions**

| Time point (Week)         | 1   | 2 | 3   | 4 | 5   | 6 | 7 | 8 | 9 | 10 | 11 | 12 |
|---------------------------|-----|---|-----|---|-----|---|---|---|---|----|----|----|
| <b>Enrolment</b>          |     |   |     |   |     |   |   |   |   |    |    |    |
| Eligibility               | ×   |   |     |   |     |   |   |   |   |    |    |    |
| Informed consent          | ×   |   |     |   |     |   |   |   |   |    |    |    |
| Allocation                | ×   |   |     |   |     |   |   |   |   |    |    |    |
| <b>Measures</b>           |     |   |     |   |     |   |   |   |   |    |    |    |
| Demographic Information   | ×   |   |     |   |     |   |   |   |   |    |    |    |
| Clinical Information      | ×   |   |     |   |     |   |   |   |   |    |    |    |
| Blood test results        | ×   |   |     | × |     |   |   | × |   |    |    | ×  |
| Fatigue                   | ×   |   |     | × |     |   |   | × |   |    |    | ×  |
| Other kidney symptoms     | ×   |   |     |   |     |   |   |   |   |    |    | ×  |
| Occupational performance  | ×   |   |     |   |     |   |   |   |   |    |    | ×  |
| HRQoL                     | ×   |   |     |   |     |   |   |   |   |    |    | ×  |
| Activity checklist        | ×   |   |     |   |     |   |   |   |   |    |    | ×  |
| <b>Intervention</b>       |     |   |     |   |     |   |   |   |   |    |    |    |
| Intervention: ECE Program | ES1 |   | ES2 |   | ES3 |   |   |   |   | B  |    |    |

|                             |   |   |   |   |   |   |   |   |   |   |   |   |
|-----------------------------|---|---|---|---|---|---|---|---|---|---|---|---|
| Intervention:<br>Usual care | × | × | × | × | × | × | × | × | × | × | × | × |
| Control: Usual<br>care      | × | × | × | × | × | × | × | × | × | × | × | × |

*Note.* ¶ ES1: Educational session 1; ES2: Educational session 2; ES3: Educational session 3; B: Booster session

### **Randomisation**

In this cluster randomised study, the unit of observation is at the level of the individual, and the unit of randomisation is at the level of dialysis day (cluster). Cluster randomisation will be done according to the HD day (Sunday/Tuesday/Thursday or Monday/Wednesday/Friday) determined by an independent person, not directly involved in the study. This method of randomisation will avoid possible treatment contamination. Instances of participants attending different dialysis days and being potentially exposed to the intervention will be documented. An equal number of participants will be recruited from each cluster to ensure both intervention and control groups have an equal number.

### **Recruitment and data collection**

The research assistants (RAs) will liaise with the dialysis nurse and medical doctor to identify eligible potential participants. A dialysis nurse who is taking care of the participant will seek approval from the participant to introduce the RA. Following confirmation, the RAs will approach potential participants to introduce herself, the purpose, and methods of the study. The RAs will then assess all inclusion/exclusion criteria and invite them to participate. Potential participants will receive an information sheet and it will also be read out a loud (due to basic literacy concerns). Potential participants will also be given an opportunity to ask if there are any queries about the study before giving written consent. Baseline data will be collected by the RAs and entered into the Research Electronic Data Capture (REDCap) mobile application.

1  
2  
3 Recruitment will occur until the required sample size is achieved. Comprehensive training is  
4 provided to RAs prior to starting the study.  
5  
6  
7  
8  
9

### 10 **Blinding**

11  
12 Due to the nature of the intervention and its pragmatic design, it will not be possible to blind  
13 participants, researcher, dialysis nurses or nephrologists. However, to minimise the risk of bias,  
14 a different RA, who will collect follow up data, will be blinded to group allocation.  
15 Nephrologists and dialysis nurses who are responsible for caring for patients will not be  
16 involved in the allocation, delivery of the intervention or data collection. They may be aware  
17 of the allocation, but this will not affect the outcome of the study.  
18  
19  
20  
21  
22  
23  
24  
25  
26  
27

### 28 **Data management**

29  
30 All data will be managed using the Research Electronic Data Capture (REDCap) tool. It is a  
31 secure web application designed to support data capture for studies<sup>56</sup>, and it is suitable to use  
32 in Nepal. Hard copy material, including consent forms and activity checklist will be securely  
33 held in a locked filing cabinet. Electronic data will be stored in the secure research storage  
34 service managed by the university. The stored data will be accessible only by the research team.  
35 All identifiable information received from participants will be replaced with a unique code with  
36 the stored separately. Data used in the analyses will remain in the de-identified format. No  
37 identifying information will be published. All data will be retained for at least 15 years after  
38 the end of the study, and then permanently deleted from the computer system or shredded.  
39  
40  
41  
42  
43  
44  
45  
46  
47  
48  
49  
50  
51  
52  
53

### 54 **Data analysis**

55  
56 First, a coding manual for each outcome variable will be developed with responses scored  
57 prior to entering the IBM SPSS statistics software version 28. Data will then be cleaned and  
58 checked to evaluate for missing data, any errors or invalid responses. Descriptive statistics will  
59  
60



1  
2  
3 be used for all study variables. Baseline characteristics will be compared for the control and  
4  
5 intervention group using independent *t*-test or Mann Whitney *U* tests for continuous variables  
6  
7 while Chi-square or Fisher Exact tests for categorical variables. McNamar's test will be used  
8  
9 to determine the difference in the activity before and after the intervention in the intervention  
10  
11 group. Intention-to-treat principles using linear mixed models (LMM) will determine the  
12  
13 differences between intervention and control groups between primary and secondary outcomes  
14  
15 variables. This type of analysis is used to evaluate the effect of an intervention at different time  
16  
17 points and also group-by-time interaction between groups. It is also possible to adjust the  
18  
19 LMM due to the clustered nature of the data and include all randomised participants in the  
20  
21 analysis. For continuous variables, when normality assumptions are not met, data will be  
22  
23 transformed using log transformation. Effectiveness of intervention will be reported using  
24  
25 mean differences with 95% confidence intervals (CI). Significance will be set at  $p < 0.05$ .  
26  
27  
28  
29  
30  
31  
32

### 33 **Trial Status**

34  
35 Trial is currently ongoing. Recruitment commenced in April 2021 and is expected to be  
36  
37 completed in February 2021.  
38  
39  
40  
41

### 42 **Patient and Public involvement**

43  
44 There is no active involvement of patients or public in the development of this study protocol.  
45  
46  
47  
48

### 49 **Ethics and dissemination**

50  
51 Ethical approval was obtained from the Human Research Committee of Griffith University and  
52  
53 also the Ethical Review Board of Nepal Health Research Council prior to the commencement  
54  
55 of the study. Appropriate approval was also sought from the research site. Informed written  
56  
57 consent will be obtained from each participant before study commencement. Participants will  
58  
59 be informed about voluntary participation and that there is no foreseeable risk or harm in  
60

1  
2  
3 participating in the study. Participants will be assured that their confidentiality will be  
4 maintained. Participants also have the liberty to discontinue participating in the study without  
5 any clarification. All personal data will be deidentified before analysis and reported  
6 collectively. The trial has been accepted by and registered in ClinicalTrials.gov (Trial  
7 registration ID NCT04360408) on April 23, 2020.  
8  
9  
10  
11  
12  
13  
14  
15  
16

17 The results of this research will be published and presented in a variety of forums. Manuscripts  
18 will be submitted to peer-reviewed journals and conference abstracts will be prepared for  
19 national and international conferences.  
20  
21  
22  
23  
24  
25  
26  
27

## 28 **Discussion**

29  
30 There is growing evidence of a direct relationship between symptom burden and HRQoL in  
31 individuals with kidney failure;<sup>57-59</sup> however, the evidence to inform practice about improving  
32 HRQoL by targeting the most prevalent and severe symptom, fatigue, is not apparent. Energy  
33 conservation management does seem to improve the self-management of fatigue in other  
34 chronic diseases although it's effectiveness for CKD-related fatigue is unknown. This study is  
35 needed as it will provide empirical evidence about the effectiveness of an ECE program for  
36 fatigue management that can be integrated into the everyday life of people receiving HD.  
37  
38  
39  
40  
41  
42  
43  
44  
45  
46  
47

48 Major limitations of this study are that recruitment of participants is from one dialysis centre  
49 in Nepal. This limitation is somewhat mitigated because the selected setting is one of the largest  
50 centres in the country referred for HD services. In addition, the study's population is limited to  
51 those receiving HD, which limits the generalisability of the finding to other CKD groups such  
52 as those receiving conservative treatment or other forms of kidney replacement therapy. This  
53 study will also use patient-reported outcome measures for symptoms, HRQoL, and  
54  
55  
56  
57  
58  
59  
60

1  
2  
3 occupational performance; thus, it is difficult to identify whether participants will accurately  
4 report change in outcomes over time. Moreover, participants in this study will not be followed  
5  
6  
7  
8 up for a long period after the intervention.  
9

10  
11  
12 In conclusion, this study will evaluate the effectiveness of an ECE program to reduce fatigue  
13  
14 in people with kidney failure receiving HD. The evidence generated from this study is expected  
15  
16 to positively influence patient outcomes by assessing symptoms and providing appropriate  
17  
18 educational interventions during the HD session.  
19  
20  
21  
22  
23  
24  
25  
26

## 27 **Figure Caption**

### 30 **Figure 1**

31  
32  
33 CONSORT flow diagram: extension to cluster, reflecting the flow of participants in the study.  
34  
35 CONSORT, Consolidated Standards of Reporting Trials; HRQoL, Health-related quality of  
36  
37 life; ECE, Energy Conservation Education.  
38  
39  
40  
41  
42  
43  
44  
45  
46  
47  
48  
49  
50  
51  
52  
53  
54  
55  
56  
57  
58  
59  
60

## References

1. Jha V. Current status of end-stage renal disease care in India and Pakistan. *Kidney Int Suppl* 2013;**3**(2):157-160. [doi: 10.1038/kisup.2013.3](https://doi.org/10.1038/kisup.2013.3)
2. Hill NR, Fatoba ST, Oke JL, Hirst JA, O'Callaghan CA, Lasserson DS, *et al.* Global Prevalence of Chronic Kidney Disease – A Systematic Review and Meta-Analysis. *PLoS One* 2016;**11**(7):e0158765. [doi: 10.1371/journal.pone.0158765](https://doi.org/10.1371/journal.pone.0158765)
3. Webster AC, Nagler EV, Morton RL, Masson P. Chronic Kidney Disease. *The Lancet* 2017;**389**(10075):1238-1252. [doi:10.1016/S0140-6736\(16\)32064-5](https://doi.org/10.1016/S0140-6736(16)32064-5)
4. Levey AS, Eckardt K-U, Dorman NM, Christiansen SL, Hoorn EJ, Ingelfinger JR, *et al.* Nomenclature for kidney function and disease: report of a kidney disease: improving global outcomes (KDIGO) consensus conference. *Kidney Int* 2020;**97**(6):1117-1129.
5. Mcgee J, Pandey B, Maskey A, Frazer T, Mackinney T. Free dialysis in Nepal: Logistical challenges explored. *Hemodial Int* 2018;**22**(3):283-289. [doi:10.1111/hdi.12629](https://doi.org/10.1111/hdi.12629)
6. Hwang HS, Hong YA, Yoon HE, Chang YK, Kim SY, Kim YO, *et al.* Comparison of Clinical Outcome Between Twice-Weekly and Thrice-Weekly Hemodialysis in Patients With Residual Kidney Function. *Medicine* 2016;**95**(7):e2767. [doi:10.1097/md.0000000000002767](https://doi.org/10.1097/md.0000000000002767)
7. Sinclair A, Cimon K, Loncar M, Sood M, Komenda P, Severn M, *et al.* CADTH Optimal Use Reports. Dialysis Modalities for the Treatment of End-Stage Kidney Disease: A Health Technology Assessment. Ottawa (ON): Canadian Agency for Drugs and Technologies in Health.; 2017.
8. Wan EYF, Chen JY, Choi EPH, Wong CKH, Chan AKC, Chan KHY, *et al.* Patterns of health-related quality of life and associated factors in Chinese patients undergoing haemodialysis. *Health Qual of Life Outcomes* 2015;**13**(1):108. [doi:10.1016/S0140-6736\(16\)32064-5](https://doi.org/10.1016/S0140-6736(16)32064-5)

- 1  
2  
3 9. Meek KP, Bergeron CD, Towne SD, Ahn S, Ory MG, Smith ML. Restricted Social  
4 Engagement among Adults Living with Chronic Conditions. *Int J Env ResPub He*  
5  
6 2018;**15**(1):158. [doi:10.3390/ijerph15010158](https://doi.org/10.3390/ijerph15010158)  
7  
8
- 9  
10 10. Gerogianni SK, Babatsikou FP. Social Aspects of Chronic Renal Failure in Patients  
11 Undergoing Haemodialysis. *Int J Caring Sci* 2014;**7**(3):740-745.  
12  
13
- 14 11. Hui L, Ya-fang J, Chiu-Chu L. Factors associated with self-management by people  
15 undergoing hemodialysis: A descriptive study. *Int J Nurs Stud* 2014;**51**(2):208-216.  
16  
17 [doi: 10.1016/j.ijnurstu.2013.05.012](https://doi.org/10.1016/j.ijnurstu.2013.05.012)  
18  
19
- 20 12. Moskovitch JT, Mount PF, Davies MRP. Changes in Symptom Burden in Dialysis  
21 Patients Assessed Using a Symptom-Reporting Questionnaire in Clinic. *J Palliat Care*  
22 2020;**35**(1):59-65. [doi:10.1177/0825859719827315](https://doi.org/10.1177/0825859719827315)  
23  
24  
25
- 26 13. Almutary H, Bonner A, Douglas C. Which patients with chronic kidney disease have  
27 the greatest symptom burden? A Comparative study of advanced CKD stage and  
28 dialysis modality. *J Ren Care* 2016;**42**(2):73-82. [doi:10.1111/jorc.12152](https://doi.org/10.1111/jorc.12152)  
29  
30  
31
- 32 14. Bossola M, Pepe G, Picca A, Calvani R, Marzetti E. Treating symptoms to improve the  
33 quality of life in patients on chronic hemodialysis. *Int Urol Nephrol* 2019;**51**(5):885-  
34 887. [doi:10.1007/s11255-019-02121-5](https://doi.org/10.1007/s11255-019-02121-5)  
35  
36  
37
- 38 15. Almutary H, Bonner A, Douglas C. Symptom burden in chronic kidney disease: a  
39 review of recent literature. *J Ren Care* 2013;**39**(3):140-150. [doi:10.1111/j.1755-  
40 6686.2013.12022.x](https://doi.org/10.1111/j.1755-6686.2013.12022.x)  
41  
42  
43
- 44 16. Dąbrowska-Bender M, Dykowska G, Żuk W, Milewska M, Staniszevska A. The  
45 impact on quality of life of dialysis patients with renal insufficiency. *Patient Prefer*  
46 *Adherence* 2018;**12**:577-583. [doi:10.2147/PPA.S156356](https://doi.org/10.2147/PPA.S156356)  
47  
48  
49  
50  
51  
52  
53  
54  
55  
56  
57  
58  
59  
60

- 1  
2  
3 17. Hornsby BWY, Naylor G, Bess FH. A Taxonomy of Fatigue Concepts and Their  
4 Relation to Hearing Loss. *Ear Hear* 2016;**37** (Suppl 1):136S-144S.  
5  
6 [doi:10.1097/AUD.0000000000000289](https://doi.org/10.1097/AUD.0000000000000289)  
7  
8
- 9  
10 18. Bossola M, Vulpio C, Tazza L. Fatigue in Chronic Dialysis Patients. *Semin Dial*  
11  
12 2011;**24**(5):550-555. [doi:10.1007/s11255-019-02121-5](https://doi.org/10.1007/s11255-019-02121-5)  
13  
14
- 15 19. Zalai D, Bohra M. Fatigue in chronic kidney disease: Definition, assessment and  
16 treatment. *Journal ACITN* 2016;**26**(1):39-44.  
17  
18
- 19 20. Kraus MA, Fluck RJ, Weinhandl ED, Kansal S, Copland M, Komenda P, *et al.*  
20 Intensive Hemodialysis and Health-Related Quality of Life. *Am J Kidney Dis*  
21  
22 2016;**68**(5):S33-S42. [doi:10.1053/j.ajkd.2016.05.023](https://doi.org/10.1053/j.ajkd.2016.05.023)  
23  
24  
25
- 26 21. Bossola M, Di Stasio E, Giungi S, Rosa F, Tazza L. Fatigue is associated with serum  
27 interleukin-6 levels and symptoms of depression in patients on chronic hemodialysis. *J*  
28  
29  
30  
31  
32  
33  
34  
35  
36  
37  
38  
39  
40  
41  
42  
43  
44  
45  
46  
47  
48  
49  
50  
51  
52  
53  
54  
55  
56  
57  
58  
59  
60  
*Pain Symptom Manage*. 2015 Mar;**49**(3):578-85. doi:  
10.1016/j.jpainsymman.2014.07.009
22. Artom M, Moss-Morris R, Caskey F, Chilcot J. Fatigue in advanced kidney disease.  
*Kidney Int* 2014;**86**(3):497-505. [doi:10.1038/ki.2014.86](https://doi.org/10.1038/ki.2014.86)
23. Bonner A, Wellard S, Caltabiano M. The impact of fatigue on daily activity in people  
with chronic kidney disease. *J Clin Nurs* 2010;**19**(21-22):3006-3015.  
[doi:10.1111/j.1365-2702.2010.03381.x](https://doi.org/10.1111/j.1365-2702.2010.03381.x)
24. Bonner A, Wellard S, Caltabiano M. Levels of fatigue in people with ESRD living in  
far North Queensland. *J Clin Nurs* 2008;**17**(1):90-98. [doi:10.1111/j.1365-2702.2007.02042.x](https://doi.org/10.1111/j.1365-2702.2007.02042.x)
25. Horigan AE. Fatigue in Hemodialysis Patients: A Review of Current Knowledge. *J*  
*Pain Symptom Manage* 2012;**44**(5):715-724. [doi:10.1016/j.jpainsymman.2011.10.015](https://doi.org/10.1016/j.jpainsymman.2011.10.015)

- 1  
2  
3 26. Picariello F, Moss-Morris R, Macdougall IC, Chilcot J. The role of psychological  
4 factors in fatigue among end-stage kidney disease patients: a critical review. *Clin*  
5  
6 *Kidney J* 2016;**10**(1):79-88. [doi:10.1093/ckj/sfw113](https://doi.org/10.1093/ckj/sfw113)  
7  
8
- 9  
10 27. Horigan AE, Schneider SM, Docherty S, Barroso J. The experience and self-  
11 management of fatigue in patients on hemodialysis. *Nephrol Nurs J* 2013;**40**(2):113-  
12  
13 122.  
14
- 15  
16 28. Johansen KL, Finkelstein FO, Revicki DA, Evans C, Wan S, Gitlin M, *et al.* Systematic  
17 review of the impact of erythropoiesis-stimulating agents on fatigue in dialysis patients.  
18  
19 *Nephrol Dial Transplant* 2011;**27**(6):2418-2425. [doi:10.1093/ndt/gfr697](https://doi.org/10.1093/ndt/gfr697)  
20  
21  
22
- 23 29. Jhamb M, McNulty ML, Ingalsbe G, Childers JW, Schell J, Conroy MB, *et al.*  
24 Knowledge, barriers and facilitators of exercise in dialysis patients: a qualitative study  
25 of patients, staff and nephrologists. *BMC Nephrol.* 2016 Nov 24;**17**(1):192. doi:  
26  
27 10.1186/s12882-016-0399-z. PMID: 27881101; PMCID: PMC5121941.  
28  
29  
30  
31  
32
- 33 30. Bennett S, Pigott A, Beller EM, Haines T, Meredith P, Delaney C. Educational  
34 interventions for the management of cancer-related fatigue in adults. *Cochrane*  
35  
36 *Database Syst Rev* 2016;**11**:CD008144. [doi:10.1002/14651858.CD008144.pub2](https://doi.org/10.1002/14651858.CD008144.pub2)  
37  
38  
39
- 40 31. Kao Y-H, Huang Y-C, Chen P-Y, Wang K-M. The effects of exercise education  
41 intervention on the exercise behaviour, depression, and fatigue status of chronic kidney  
42  
43 disease patients. *Health Educ* 2012;**112**(6):472-484. [doi:10.1108/09654281211275827](https://doi.org/10.1108/09654281211275827)  
44  
45  
46  
47
- 48 32. Blikman LJ, Huisstede BM, Kooijmans H, Stam HJ, Bussmann JB, van Meeteren J.  
49 Effectiveness of Energy Conservation Treatment in Reducing Fatigue in Multiple  
50  
51 Sclerosis: A Systematic Review and Meta-Analysis. *Arch Phys Med Rehabil*  
52  
53 2013;**94**(7):1360-1376. [doi:10.1016/j.apmr.2013.01.025](https://doi.org/10.1016/j.apmr.2013.01.025)  
54  
55  
56
- 57 33. Sadeghi E, Gozali N, Tabrizi FM. Effects of energy conservation strategies on cancer  
58 related fatigue and health promotion lifestyle in breast cancer survivors: a randomized  
59  
60

- control trial. *Asian Pac J Cancer Prevention* 2016;**17**(10):4783-4790.  
[doi:10.22034/apjcp.2016.17.10.4783](https://doi.org/10.22034/apjcp.2016.17.10.4783)
34. Khozimeh FS, Navidian A, Sasanpour P, Kiani F. The Effect of Training on Energy Conservation Strategies, Fatigue, and Self-Caring among Women with Breast Cancer Undergoing Chemotherapy in Zahedan Medical Sciences Hospitals in 2018-2019. *J. Evol. Med. Dent. Sci* 2019;**8**(49):3661-3667.
35. Finlayson M, Preissner K, Cho C, Plow M. Randomized trial of a teleconference-delivered fatigue management program for people with multiple sclerosis. *Mult Scler* 2011;**17**(9):1130-1140. [doi:10.1177/1352458511404272](https://doi.org/10.1177/1352458511404272)
36. Mathiowetz VG, Finlayson ML, Matuska KM, Chen HY, Luo P. Randomized controlled trial of an energy conservation course for persons with multiple sclerosis. *Mult Scler* 2005;**11**(5):592-601. [doi:10.1191/1352458505ms1198oa](https://doi.org/10.1191/1352458505ms1198oa)
37. Sharma S, Green T, Alexander KE, Bonner A. Educational or behavioural interventions for symptoms and health-related quality of life in adults receiving haemodialysis: A systematic review. *J Ren Care* 2020;**46**(4):233-249. [doi:10.1111/jorc.12329](https://doi.org/10.1111/jorc.12329)
38. Yoong SL, Wolfenden L, Clinton-McHarg T, Waters E, Pettman TL, Steele E, *et al.* Exploring the pragmatic and explanatory study design on outcomes of systematic reviews of public health interventions: a case study on obesity prevention trials. *J Public Health*. 2014;**36**(1):170-176. [doi:10.1093/pubmed/fdu006](https://doi.org/10.1093/pubmed/fdu006)
39. Vadiraja HS, Rao RM, Nagarathna R, Nagendra HR, Patil S, Diwakar RB, *et al.* Effects of Yoga in Managing Fatigue in Breast Cancer Patients: A Randomized Controlled Trial. *Indian J Palliat Care*. 2017;**23**(3):247-252. doi: 10.4103/IJPC.IJPC\_95\_17. PMID: 28827926; PMCID: PMC5545948.
40. Blikman LJ, van Meeteren J, Twisk JW, de Laat FA, de Groot V, Beckerman H, *et al.* Effectiveness of energy conservation management on fatigue and participation in



- multiple sclerosis: A randomized controlled trial. *Mult Scler J* 2017;**23**(11):1527-1541.
41. Packer TL, Brink N, Sauriol A. Managing fatigue : a six-week course for energy conservation. Brink N, Sauriol A, editors. Tucson, Ariz: Therapy Skill Builders; 1995.
42. Humphreys J, Janson S, Donesky DA, Dracup K, Lee KA, Puntillo K, *et al.* Theory of symptom management. Middle range theory for nursing, 3rd ed. New York, NY, US: Springer Publishing Company; 2014. p. 141-164.
43. Larson PJ, Carrieri-Kohlman V, Dodd MJ, Douglas M, Faucett J, Froelicher ES, *et al.* A Model for Symptom Management. *J Nurs Scholarsh* 1994;**26**(4):272-276.  
[doi:10.1111/j.1547-5069.1994.tb00333.x](https://doi.org/10.1111/j.1547-5069.1994.tb00333.x)
44. Hann DM, Jacobsen PB, Azzarello LM, Martin SC, Curran SL, Fields KK, *et al.* Measurement of fatigue in cancer patients: development and validation of the Fatigue Symptom Inventory. *Qual Life Res* 1998;**7**(4):301-310. [doi:10.1023/a:1024929829627](https://doi.org/10.1023/a:1024929829627)
45. Ju A, Unruh ML, Davison SN, Dapuelto J, Dew MA, Fluck R, *et al.* Patient-reported outcome measures for fatigue in patients on hemodialysis: a systematic review. *Am J Kidney Dis* 2018;**71**(3):327-343.
46. Dahal A, Meheta RK. Fatigue experience and coping strategies among cancer patients receiving chemotherapy. *Nepal Health Res Counc* 2018;**16**(3):285-290.  
[doi:10.3126/jnhrc.v16i3.21425](https://doi.org/10.3126/jnhrc.v16i3.21425)
47. Murphy EL, Murtagh FE, Carey I, Sheerin NS. Understanding symptoms in patients with advanced chronic kidney disease managed without dialysis: use of a short patient-completed assessment tool. *Nephron Clinical Practice* 2009;**111**(1):c74-c80.
48. C Cicely Saunders Institute. Palliative care outcome scale-IPOS-Renal: Cicely Saunders Institute; 2016.<https://pos-pal.org/maix/ipos-renal-in-english.php>. Accessed on 4 Sep 2020

- 1  
2  
3  
4  
5  
6  
7  
8  
9  
10  
11  
12  
13  
14  
15  
16  
17  
18  
19  
20  
21  
22  
23  
24  
25  
26  
27  
28  
29  
30  
31  
32  
33  
34  
35  
36  
37  
38  
39  
40  
41  
42  
43  
44  
45  
46  
47  
48  
49  
50  
51  
52  
53  
54  
55  
56  
57  
58  
59  
60
49. Cicely Saunders Institute. How to score IPOS: Cicely Saunders Institute; 2016. <https://pos-pal.org/maix/how-to-score.php>. Accessed on 4 Sep 2020
50. Raj R, Ahuja K, Frandsen M, Murtagh FE, Jose M. Validation of the IPOS-renal symptom survey in advanced kidney disease: a cross-sectional study. *J Pain Symptom Manage* 2018;**56**(2):281-287.
51. Sousa VD, Rojjanasrirat W. Translation, adaptation and validation of instruments or scales for use in cross-cultural health care research: a clear and user-friendly guideline. *J Eval Clin Pract* 2011;**17**(2):268-274. [doi:10.1111/j.1365-2753.2010.01434.x](https://doi.org/10.1111/j.1365-2753.2010.01434.x)
52. Law M, Baptiste S, McColl M, Opzoomer A, Polatajko H, Pollock N. The Canadian occupational performance measure: an outcome measure for occupational therapy. *Can. J Occup Ther* 1990;**57**(2):82-87. [doi:10.1177/000841749005700207?url\\_ver=Z39.88-2003&rft\\_id=ori:rid:crossref.org&rft\\_dat=cr\\_pub%3dpubmed](https://doi.org/10.1177/000841749005700207?url_ver=Z39.88-2003&rft_id=ori:rid:crossref.org&rft_dat=cr_pub%3dpubmed)
53. Carswell A, McColl MA, Baptiste S, Law M, Polatajko H, Pollock N. The Canadian Occupational Performance Measure: a research and clinical literature review. *J Occup Ther* 2004;**71**(4):210-222. [doi:10.1177/000841740407100406](https://doi.org/10.1177/000841740407100406)
54. Kafle-Bhandari B, Pradhan RR, Pathak R, Poudyal S, Paudyal MB, Sharma S, *et al.* Assessment of Validity of SF 36 Questionnaire Using Nepali Language to Determine Health-related Quality of Life in Patients with Chronic Liver Disease: A Pilot Study. *Cureus* 2018;**10**(7):e2925-e2925. [doi:10.7759/cureus.2925](https://doi.org/10.7759/cureus.2925)
55. Brazier JE, Harper R, Jones NM, Cathain A, Thomas KJ, Usherwood T, *et al.* Validating the SF-36 health survey questionnaire: new outcome measure for primary care. *Br Med J* 1992;**305**(6846):160. [doi:10.1136/bmj.305.6846.160](https://doi.org/10.1136/bmj.305.6846.160)
56. Harris PA, Taylor R, Minor BL, Elliott V, Fernandez M, O'Neal L, *et al.* The REDCap consortium: Building an international community of software platform partners. *J Biomed Inform.* 2019 Jul;**95**:103208. doi: 10.1016/j.jbi.2019.103208.

- 1  
2  
3 57. Schick-Makaroff K, Molzahn AE, Kalfoss M. Symptoms, coping, and quality of life of  
4 people with chronic kidney disease. *Nephrol Nurs J* 2018;**45**(4):339-355.  
5  
6  
7  
8 58. Fukushima RLM, Menezes ALC, Inouye K, Pavarini SCI, Orlandi FdS. Quality of life  
9 and associated factors in patients with chronic kidney disease on hemodialysis. *Acta*  
10 *Paulista de Enfermagem* 2016;**29**(5):518-524. [doi:10.1590/1982-0194201600072](https://doi.org/10.1590/1982-0194201600072)  
11  
12  
13  
14  
15 59. Almutary H, Douglas C, Bonner A. Towards a symptom cluster model in chronic  
16 kidney disease: A structural equation approach. *J Adv Nurs* 2017;**73**(10):2450-2461.  
17  
18  
19 [doi:10.1111/jan.13303](https://doi.org/10.1111/jan.13303)  
20  
21  
22  
23  
24  
25  
26  
27  
28  
29  
30  
31  
32  
33  
34  
35  
36  
37  
38  
39  
40  
41  
42  
43  
44  
45  
46  
47  
48  
49  
50  
51  
52  
53  
54  
55  
56  
57  
58  
59  
60

## Footnotes

**Contributors:** The study was conceived by SS, KA, TG, M-LW, and AB. SS led the literature review. All authors contributed to the preparation of the proposal, critical review, and final approval of the manuscript.

**Funding statement:** This study received no specific grant from any funding agency in the public, commercial or not-for-profit sectors.

**Competing interests:** The authors declare that they have no competing interest.

**Ethics approval:** Ethical approval is obtained from Human Research Ethics Committee, Griffith University (GU Ref. No. 2021/053), the Nepal Health Research Council (Reg No. 1520).

**Provenance and peer review** Not commissioned, externally peer reviewed.

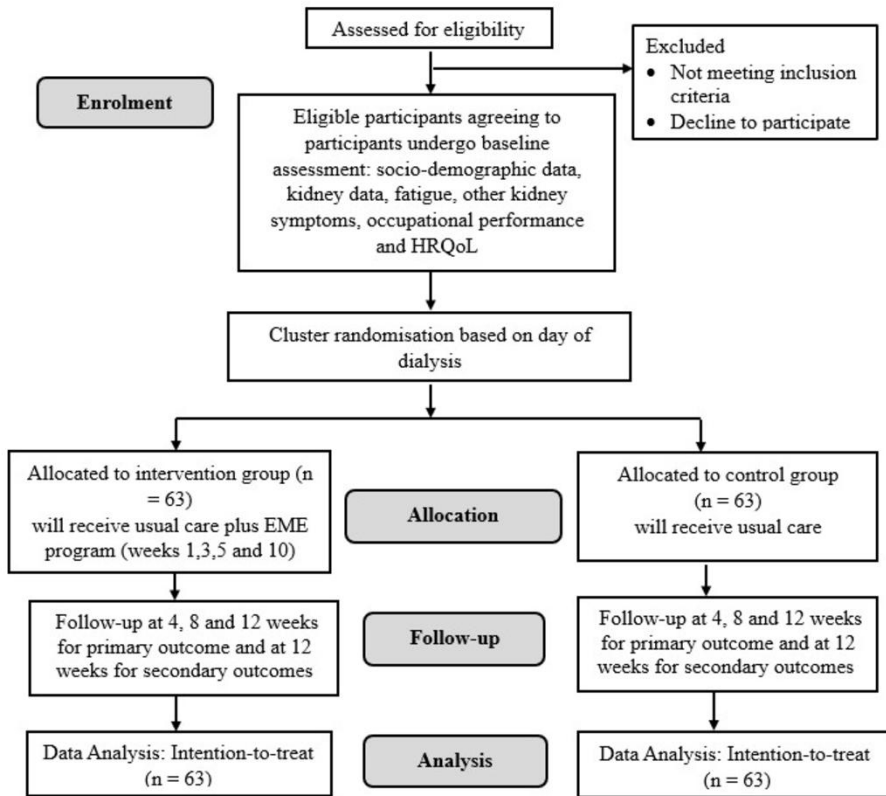

Figure 1  
 CONSORT flow diagram: extension to cluster, reflecting the flow of participants in the study. CONSORT, Consolidated Standards of Reporting Trials; HRQoL, Health-related quality of life; ECE, Energy Conservation Education.

96x89mm (300 x 300 DPI)

# Reporting checklist for protocol of a clinical trial.

Based on the SPIRIT guidelines.

## Instructions to authors

Complete this checklist by entering the page numbers from your manuscript where readers will find each of the items listed below.

Your article may not currently address all the items on the checklist. Please modify your text to include the missing information. If you are certain that an item does not apply, please write "n/a" and provide a short explanation.

Upload your completed checklist as an extra file when you submit to a journal.

In your methods section, say that you used the SPIRIT reporting guidelines, and cite them as:

Chan A-W, Tetzlaff JM, Gøtzsche PC, Altman DG, Mann H, Berlin J, Dickersin K, Hróbjartsson A, Schulz KF, Parulekar WR, Krleža-Jerić K, Laupacis A, Moher D. SPIRIT 2013 Explanation and Elaboration: Guidance for protocols of clinical trials. *BMJ*. 2013;346:e7586

|                                   | Reporting Item                                                                                                                  | Page Number                        |
|-----------------------------------|---------------------------------------------------------------------------------------------------------------------------------|------------------------------------|
| <b>Administrative information</b> |                                                                                                                                 |                                    |
| Title                             | <a href="#">#1</a> Descriptive title identifying the study design, population, interventions, and, if applicable, trial acronym | Title page; full title, page no. 1 |
| Trial registration                | <a href="#">#2a</a> Trial identifier and registry name. If not yet registered,                                                  | Abstract; trial                    |

|    |                     | name of intended registry                                                   | registration, |
|----|---------------------|-----------------------------------------------------------------------------|---------------|
|    |                     |                                                                             | page no. 2    |
| 1  |                     |                                                                             |               |
| 2  |                     |                                                                             |               |
| 3  |                     |                                                                             |               |
| 4  |                     |                                                                             |               |
| 5  |                     |                                                                             |               |
| 6  | Trial registration: | <a href="#">#2b</a> All items from the World Health Organization Trial      | N/A           |
| 7  |                     |                                                                             |               |
| 8  | data set            | Registration Data Set                                                       |               |
| 9  |                     |                                                                             |               |
| 10 |                     |                                                                             |               |
| 11 | Protocol version    | <a href="#">#3</a> Date and version identifier                              | N/A           |
| 12 |                     |                                                                             |               |
| 13 |                     |                                                                             |               |
| 14 | Funding             | <a href="#">#4</a> Sources and types of financial, material, and other      | Page 29       |
| 15 |                     | support                                                                     |               |
| 16 |                     |                                                                             |               |
| 17 |                     |                                                                             |               |
| 18 |                     |                                                                             |               |
| 19 | Roles and           | <a href="#">#5a</a> Names, affiliations, and roles of protocol contributors | Page 1 and 29 |
| 20 |                     |                                                                             |               |
| 21 | responsibilities:   |                                                                             |               |
| 22 |                     |                                                                             |               |
| 23 | contributorship     |                                                                             |               |
| 24 |                     |                                                                             |               |
| 25 |                     |                                                                             |               |
| 26 |                     |                                                                             |               |
| 27 | Roles and           | <a href="#">#5b</a> Name and contact information for the trial sponsor      | N/A           |
| 28 |                     |                                                                             |               |
| 29 | responsibilities:   |                                                                             |               |
| 30 |                     |                                                                             |               |
| 31 | sponsor contact     |                                                                             |               |
| 32 |                     |                                                                             |               |
| 33 | information         |                                                                             |               |
| 34 |                     |                                                                             |               |
| 35 |                     |                                                                             |               |
| 36 |                     |                                                                             |               |
| 37 | Roles and           | <a href="#">#5c</a> Role of study sponsor and funders, if any, in study     | N/A           |
| 38 |                     |                                                                             |               |
| 39 | responsibilities:   | design; collection, management, analysis, and                               |               |
| 40 |                     |                                                                             |               |
| 41 | sponsor and funder  | interpretation of data; writing of the report; and the                      |               |
| 42 |                     |                                                                             |               |
| 43 |                     |                                                                             |               |
| 44 |                     | decision to submit the report for publication, including                    |               |
| 45 |                     |                                                                             |               |
| 46 |                     | whether they will have ultimate authority over any of                       |               |
| 47 |                     |                                                                             |               |
| 48 |                     | these activities                                                            |               |
| 49 |                     |                                                                             |               |
| 50 |                     |                                                                             |               |
| 51 | Roles and           | <a href="#">#5d</a> Composition, roles, and responsibilities of the         | N/A           |
| 52 |                     |                                                                             |               |
| 53 | responsibilities:   | coordinating centre, steering committee, endpoint                           |               |
| 54 |                     |                                                                             |               |
| 55 | committees          | adjudication committee, data management team, and                           |               |
| 56 |                     |                                                                             |               |
| 57 |                     |                                                                             |               |
| 58 |                     |                                                                             |               |
| 59 |                     |                                                                             |               |
| 60 |                     |                                                                             |               |

1 other individuals or groups overseeing the trial, if  
 2  
 3 applicable (see Item 21a for data monitoring  
 4  
 5 committee)  
 6  
 7

## 8 Introduction

|                                                              |                     |                                                          |          |
|--------------------------------------------------------------|---------------------|----------------------------------------------------------|----------|
| 11 Background and                                            | <a href="#">#6a</a> | Description of research question and justification for   | Page 4-6 |
| 12 rationale                                                 |                     | undertaking the trial, including summary of relevant     |          |
| 13                                                           |                     | studies (published and unpublished) examining            |          |
| 14                                                           |                     | benefits and harms for each intervention                 |          |
| 15                                                           |                     |                                                          |          |
| 16                                                           |                     |                                                          |          |
| 17                                                           |                     |                                                          |          |
| 18                                                           |                     |                                                          |          |
| 19                                                           |                     |                                                          |          |
| 20                                                           |                     |                                                          |          |
| 21 Background and                                            | <a href="#">#6b</a> | Explanation for choice of comparators                    | Page 12  |
| 22 rationale: choice of                                      |                     |                                                          |          |
| 23 comparators                                               |                     |                                                          |          |
| 24                                                           |                     |                                                          |          |
| 25                                                           |                     |                                                          |          |
| 26                                                           |                     |                                                          |          |
| 27                                                           |                     |                                                          |          |
| 28                                                           |                     |                                                          |          |
| 29 Objectives                                                | <a href="#">#7</a>  | Specific objectives or hypotheses                        | Page 6   |
| 30                                                           |                     |                                                          |          |
| 31                                                           |                     |                                                          |          |
| 32 Trial design                                              | <a href="#">#8</a>  | Description of trial design including type of trial (eg, | Page 7   |
| 33 parallel group, crossover, factorial, single group),      |                     |                                                          |          |
| 34 allocation ratio, and framework (eg, superiority,         |                     |                                                          |          |
| 35 equivalence, non-inferiority, exploratory)                |                     |                                                          |          |
| 36                                                           |                     |                                                          |          |
| 37                                                           |                     |                                                          |          |
| 38                                                           |                     |                                                          |          |
| 39                                                           |                     |                                                          |          |
| 40                                                           |                     |                                                          |          |
| 41                                                           |                     |                                                          |          |
| 42 <b>Methods:</b>                                           |                     |                                                          |          |
| 43                                                           |                     |                                                          |          |
| 44 <b>Participants,</b>                                      |                     |                                                          |          |
| 45 <b>interventions, and</b>                                 |                     |                                                          |          |
| 46 <b>outcomes</b>                                           |                     |                                                          |          |
| 47                                                           |                     |                                                          |          |
| 48                                                           |                     |                                                          |          |
| 49                                                           |                     |                                                          |          |
| 50                                                           |                     |                                                          |          |
| 51 Study setting                                             | <a href="#">#9</a>  | Description of study settings (eg, community clinic,     | Page 7   |
| 52 academic hospital) and list of countries where data       |                     |                                                          |          |
| 53 will be collected. Reference to where list of study sites |                     |                                                          |          |
| 54                                                           |                     |                                                          |          |
| 55                                                           |                     |                                                          |          |
| 56                                                           |                     |                                                          |          |
| 57                                                           |                     |                                                          |          |
| 58                                                           |                     |                                                          |          |
| 59                                                           |                     |                                                          |          |
| 60                                                           |                     |                                                          |          |



|    |                      |                                                                             |            |
|----|----------------------|-----------------------------------------------------------------------------|------------|
| 1  |                      | can be obtained                                                             |            |
| 2  |                      |                                                                             |            |
| 3  |                      |                                                                             |            |
| 4  | Eligibility criteria | <a href="#">#10</a> Inclusion and exclusion criteria for participants. If   | Page 8     |
| 5  |                      | applicable, eligibility criteria for study centres and                      |            |
| 6  |                      | individuals who will perform the interventions (eg,                         |            |
| 7  |                      | surgeons, psychotherapists)                                                 |            |
| 8  |                      |                                                                             |            |
| 9  |                      |                                                                             |            |
| 10 |                      |                                                                             |            |
| 11 |                      |                                                                             |            |
| 12 |                      |                                                                             |            |
| 13 | Interventions:       | <a href="#">#11a</a> Interventions for each group with sufficient detail to | Page 8-12  |
| 14 | description          | allow replication, including how and when they will be                      |            |
| 15 |                      | administered                                                                |            |
| 16 |                      |                                                                             |            |
| 17 |                      |                                                                             |            |
| 18 |                      |                                                                             |            |
| 19 |                      |                                                                             |            |
| 20 |                      |                                                                             |            |
| 21 | Interventions:       | <a href="#">#11b</a> Criteria for discontinuing or modifying allocated      | N/A        |
| 22 | modifications        | interventions for a given trial participant (eg, drug                       |            |
| 23 |                      | dose change in response to harms, participant                               |            |
| 24 |                      | request, or improving / worsening disease)                                  |            |
| 25 |                      |                                                                             |            |
| 26 |                      |                                                                             |            |
| 27 |                      |                                                                             |            |
| 28 |                      |                                                                             |            |
| 29 |                      |                                                                             |            |
| 30 |                      |                                                                             |            |
| 31 | Interventions:       | <a href="#">#11c</a> Strategies to improve adherence to intervention        | N/A        |
| 32 | adherence            | protocols, and any procedures for monitoring                                |            |
| 33 |                      | adherence (eg, drug tablet return; laboratory tests)                        |            |
| 34 |                      |                                                                             |            |
| 35 |                      |                                                                             |            |
| 36 |                      |                                                                             |            |
| 37 |                      |                                                                             |            |
| 38 |                      |                                                                             |            |
| 39 | Interventions:       | <a href="#">#11d</a> Relevant concomitant care and interventions that are   | N/A        |
| 40 | concomitant care     | permitted or prohibited during the trial                                    |            |
| 41 |                      |                                                                             |            |
| 42 |                      |                                                                             |            |
| 43 |                      |                                                                             |            |
| 44 | Outcomes             | <a href="#">#12</a> Primary, secondary, and other outcomes, including       | Page 12-15 |
| 45 |                      | the specific measurement variable (eg, systolic blood                       |            |
| 46 |                      | pressure), analysis metric (eg, change from baseline,                       |            |
| 47 |                      | final value, time to event), method of aggregation (eg,                     |            |
| 48 |                      | median, proportion), and time point for each outcome.                       |            |
| 49 |                      |                                                                             |            |
| 50 |                      |                                                                             |            |
| 51 |                      |                                                                             |            |
| 52 |                      |                                                                             |            |
| 53 |                      |                                                                             |            |
| 54 |                      |                                                                             |            |
| 55 |                      | Explanation of the clinical relevance of chosen                             |            |
| 56 |                      | efficacy and harm outcomes is strongly recommended                          |            |
| 57 |                      |                                                                             |            |
| 58 |                      |                                                                             |            |
| 59 |                      |                                                                             |            |
| 60 |                      |                                                                             |            |

|    |                           |                      |                                                           |            |
|----|---------------------------|----------------------|-----------------------------------------------------------|------------|
| 1  | Participant timeline      | <a href="#">#13</a>  | Time schedule of enrolment, interventions (including      | Page 15-16 |
| 2  |                           |                      | any run-ins and washouts), assessments, and visits        |            |
| 3  |                           |                      | for participants. A schematic diagram is highly           |            |
| 4  |                           |                      | recommended (see Figure)                                  |            |
| 5  |                           |                      |                                                           |            |
| 6  |                           |                      |                                                           |            |
| 7  |                           |                      |                                                           |            |
| 8  |                           |                      |                                                           |            |
| 9  |                           |                      |                                                           |            |
| 10 |                           |                      |                                                           |            |
| 11 | Sample size               | <a href="#">#14</a>  | Estimated number of participants needed to achieve        | Page 7     |
| 12 |                           |                      | study objectives and how it was determined, including     |            |
| 13 |                           |                      | clinical and statistical assumptions supporting any       |            |
| 14 |                           |                      | sample size calculations                                  |            |
| 15 |                           |                      |                                                           |            |
| 16 |                           |                      |                                                           |            |
| 17 |                           |                      |                                                           |            |
| 18 |                           |                      |                                                           |            |
| 19 |                           |                      |                                                           |            |
| 20 |                           |                      |                                                           |            |
| 21 | Recruitment               | <a href="#">#15</a>  | Strategies for achieving adequate participant             | Page 16    |
| 22 |                           |                      | enrolment to reach target sample size                     |            |
| 23 |                           |                      |                                                           |            |
| 24 |                           |                      |                                                           |            |
| 25 |                           |                      |                                                           |            |
| 26 | <b>Methods:</b>           |                      |                                                           |            |
| 27 |                           |                      |                                                           |            |
| 28 | <b>Assignment of</b>      |                      |                                                           |            |
| 29 | <b>interventions (for</b> |                      |                                                           |            |
| 30 | <b>controlled trials)</b> |                      |                                                           |            |
| 31 |                           |                      |                                                           |            |
| 32 |                           |                      |                                                           |            |
| 33 |                           |                      |                                                           |            |
| 34 |                           |                      |                                                           |            |
| 35 |                           |                      |                                                           |            |
| 36 | Allocation: sequence      | <a href="#">#16a</a> | Method of generating the allocation sequence (eg,         | Page 16    |
| 37 | generation                |                      | computer-generated random numbers), and list of any       |            |
| 38 |                           |                      | factors for stratification. To reduce predictability of a |            |
| 39 |                           |                      | random sequence, details of any planned restriction       |            |
| 40 |                           |                      | (eg, blocking) should be provided in a separate           |            |
| 41 |                           |                      | document that is unavailable to those who enrol           |            |
| 42 |                           |                      | participants or assign interventions                      |            |
| 43 |                           |                      |                                                           |            |
| 44 |                           |                      |                                                           |            |
| 45 |                           |                      |                                                           |            |
| 46 |                           |                      |                                                           |            |
| 47 |                           |                      |                                                           |            |
| 48 |                           |                      |                                                           |            |
| 49 |                           |                      |                                                           |            |
| 50 |                           |                      |                                                           |            |
| 51 |                           |                      |                                                           |            |
| 52 |                           |                      |                                                           |            |
| 53 | Allocation                | <a href="#">#16b</a> | Mechanism of implementing the allocation sequence         | Page 16    |
| 54 | concealment               |                      | (eg, central telephone; sequentially numbered,            |            |
| 55 |                           |                      | opaque, sealed envelopes), describing any steps to        |            |
| 56 |                           |                      |                                                           |            |
| 57 |                           |                      |                                                           |            |
| 58 |                           |                      |                                                           |            |
| 59 |                           |                      |                                                           |            |
| 60 |                           |                      |                                                           |            |

conceal the sequence until interventions are assigned

1  
2  
3  
4 Allocation: [#16c](#) Who will generate the allocation sequence, who will Page 16  
5  
6 implementation enrol participants, and who will assign participants to  
7  
8 interventions  
9

10  
11 Blinding (masking) [#17a](#) Who will be blinded after assignment to interventions Page 17  
12  
13 (eg, trial participants, care providers, outcome  
14  
15 assessors, data analysts), and how  
16  
17

18  
19 Blinding (masking): [#17b](#) If blinded, circumstances under which unblinding is Page 17  
20  
21 emergency permissible, and procedure for revealing a  
22  
23 unblinding participant's allocated intervention during the trial  
24  
25

26 **Methods: Data**  
27  
28 **collection,**  
29  
30 **management, and**  
31  
32 **analysis**  
33  
34  
35

36 Data collection plan [#18a](#) Plans for assessment and collection of outcome, Page 17  
37  
38 baseline, and other trial data, including any related  
39  
40 processes to promote data quality (eg, duplicate  
41  
42 measurements, training of assessors) and a  
43  
44 description of study instruments (eg, questionnaires,  
45  
46 laboratory tests) along with their reliability and validity,  
47  
48 if known. Reference to where data collection forms  
49  
50 can be found, if not in the protocol  
51  
52  
53  
54

55 Data collection plan: [#18b](#) Plans to promote participant retention and complete Page 16  
56  
57 retention follow-up, including list of any outcome data to be  
58  
59

collected for participants who discontinue or deviate  
from intervention protocols

|                                                                                                       |                                                  |                      |                                                                                                                                                                                                                                                                    |            |
|-------------------------------------------------------------------------------------------------------|--------------------------------------------------|----------------------|--------------------------------------------------------------------------------------------------------------------------------------------------------------------------------------------------------------------------------------------------------------------|------------|
| 1<br>2<br>3<br>4<br>5<br>6<br>7<br>8<br>9<br>10<br>11<br>12<br>13<br>14<br>15<br>16<br>17<br>18<br>19 | Data management                                  | <a href="#">#19</a>  | Plans for data entry, coding, security, and storage, including any related processes to promote data quality (eg, double data entry; range checks for data values). Reference to where details of data management procedures can be found, if not in the protocol  | Page 17    |
| 20<br>21<br>22<br>23<br>24<br>25<br>26<br>27<br>28<br>29                                              | Statistics: outcomes                             | <a href="#">#20a</a> | Statistical methods for analysing primary and secondary outcomes. Reference to where other details of the statistical analysis plan can be found, if not in the protocol                                                                                           | Page 17-18 |
| 30<br>31<br>32<br>33<br>34                                                                            | Statistics: additional analyses                  | <a href="#">#20b</a> | Methods for any additional analyses (eg, subgroup and adjusted analyses)                                                                                                                                                                                           | N/A        |
| 35<br>36<br>37<br>38<br>39<br>40<br>41<br>42<br>43<br>44                                              | Statistics: analysis population and missing data | <a href="#">#20c</a> | Definition of analysis population relating to protocol non-adherence (eg, as randomised analysis), and any statistical methods to handle missing data (eg, multiple imputation)                                                                                    | Page 18    |
| 45<br>46<br>47                                                                                        | <b>Methods: Monitoring</b>                       |                      |                                                                                                                                                                                                                                                                    |            |
| 48<br>49<br>50<br>51<br>52<br>53<br>54<br>55<br>56<br>57<br>58<br>59<br>60                            | Data monitoring: formal committee                | <a href="#">#21a</a> | Composition of data monitoring committee (DMC); summary of its role and reporting structure; statement of whether it is independent from the sponsor and competing interests; and reference to where further details about its charter can be found, if not in the | N/A        |

|    |                      |                                                                             |         |
|----|----------------------|-----------------------------------------------------------------------------|---------|
| 1  |                      | protocol. Alternatively, an explanation of why a DMC                        |         |
| 2  |                      |                                                                             |         |
| 3  |                      | is not needed                                                               |         |
| 4  |                      |                                                                             |         |
| 5  |                      |                                                                             |         |
| 6  | Data monitoring:     | <a href="#">#21b</a> Description of any interim analyses and stopping       | N/A     |
| 7  |                      |                                                                             |         |
| 8  | interim analysis     | guidelines, including who will have access to these                         |         |
| 9  |                      |                                                                             |         |
| 10 |                      | interim results and make the final decision to                              |         |
| 11 |                      |                                                                             |         |
| 12 |                      | terminate the trial                                                         |         |
| 13 |                      |                                                                             |         |
| 14 |                      |                                                                             |         |
| 15 |                      |                                                                             |         |
| 16 | Harms                | <a href="#">#22</a> Plans for collecting, assessing, reporting, and         | N/A     |
| 17 |                      |                                                                             |         |
| 18 |                      | managing solicited and spontaneously reported                               |         |
| 19 |                      |                                                                             |         |
| 20 |                      | adverse events and other unintended effects of trial                        |         |
| 21 |                      |                                                                             |         |
| 22 |                      | interventions or trial conduct                                              |         |
| 23 |                      |                                                                             |         |
| 24 |                      |                                                                             |         |
| 25 |                      |                                                                             |         |
| 26 | Auditing             | <a href="#">#23</a> Frequency and procedures for auditing trial conduct, if | N/A     |
| 27 |                      |                                                                             |         |
| 28 |                      | any, and whether the process will be independent                            |         |
| 29 |                      |                                                                             |         |
| 30 |                      | from investigators and the sponsor                                          |         |
| 31 |                      |                                                                             |         |
| 32 |                      |                                                                             |         |
| 33 | <b>Ethics and</b>    |                                                                             |         |
| 34 |                      |                                                                             |         |
| 35 | <b>dissemination</b> |                                                                             |         |
| 36 |                      |                                                                             |         |
| 37 |                      |                                                                             |         |
| 38 |                      |                                                                             |         |
| 39 | Research ethics      | <a href="#">#24</a> Plans for seeking research ethics committee /           | Page 18 |
| 40 |                      |                                                                             |         |
| 41 | approval             | institutional review board (REC / IRB) approval                             |         |
| 42 |                      |                                                                             |         |
| 43 |                      |                                                                             |         |
| 44 | Protocol             | <a href="#">#25</a> Plans for communicating important protocol              | N/A     |
| 45 |                      |                                                                             |         |
| 46 | amendments           | modifications (eg, changes to eligibility criteria,                         |         |
| 47 |                      |                                                                             |         |
| 48 |                      | outcomes, analyses) to relevant parties (eg,                                |         |
| 49 |                      |                                                                             |         |
| 50 |                      | investigators, REC / IRBs, trial participants, trial                        |         |
| 51 |                      |                                                                             |         |
| 52 |                      | registries, journals, regulators)                                           |         |
| 53 |                      |                                                                             |         |
| 54 |                      |                                                                             |         |
| 55 |                      |                                                                             |         |
| 56 | Consent or assent    | <a href="#">#26a</a> Who will obtain informed consent or assent from        | Page 18 |
| 57 |                      |                                                                             |         |
| 58 |                      |                                                                             |         |
| 59 |                      |                                                                             |         |
| 60 |                      |                                                                             |         |

|    |                       |                                                                                |         |
|----|-----------------------|--------------------------------------------------------------------------------|---------|
| 1  |                       | potential trial participants or authorised surrogates,                         |         |
| 2  |                       |                                                                                |         |
| 3  |                       | and how (see Item 32)                                                          |         |
| 4  |                       |                                                                                |         |
| 5  |                       |                                                                                |         |
| 6  | Consent or assent:    | <a href="#">#26b</a> Additional consent provisions for collection and use of   | Page 18 |
| 7  |                       |                                                                                |         |
| 8  | ancillary studies     | participant data and biological specimens in ancillary                         |         |
| 9  |                       |                                                                                |         |
| 10 |                       | studies, if applicable                                                         |         |
| 11 |                       |                                                                                |         |
| 12 |                       |                                                                                |         |
| 13 | Confidentiality       | <a href="#">#27</a> How personal information about potential and enrolled      | Page 19 |
| 14 |                       |                                                                                |         |
| 15 |                       | participants will be collected, shared, and maintained                         |         |
| 16 |                       |                                                                                |         |
| 17 |                       | in order to protect confidentiality before, during, and                        |         |
| 18 |                       |                                                                                |         |
| 19 |                       | after the trial                                                                |         |
| 20 |                       |                                                                                |         |
| 21 |                       |                                                                                |         |
| 22 |                       |                                                                                |         |
| 23 | Declaration of        | <a href="#">#28</a> Financial and other competing interests for principal      | Page 29 |
| 24 |                       |                                                                                |         |
| 25 | interests             | investigators for the overall trial and each study site                        |         |
| 26 |                       |                                                                                |         |
| 27 |                       |                                                                                |         |
| 28 |                       |                                                                                |         |
| 29 | Data access           | <a href="#">#29</a> Statement of who will have access to the final trial       | N/A     |
| 30 |                       |                                                                                |         |
| 31 |                       | dataset, and disclosure of contractual agreements                              |         |
| 32 |                       |                                                                                |         |
| 33 |                       | that limit such access for investigators                                       |         |
| 34 |                       |                                                                                |         |
| 35 |                       |                                                                                |         |
| 36 | Ancillary and post    | <a href="#">#30</a> Provisions, if any, for ancillary and post-trial care, and | N/A     |
| 37 |                       |                                                                                |         |
| 38 | trial care            | for compensation to those who suffer harm from trial                           |         |
| 39 |                       |                                                                                |         |
| 40 |                       | participation                                                                  |         |
| 41 |                       |                                                                                |         |
| 42 |                       |                                                                                |         |
| 43 |                       |                                                                                |         |
| 44 | Dissemination         | <a href="#">#31a</a> Plans for investigators and sponsor to communicate        | Page 18 |
| 45 |                       |                                                                                |         |
| 46 | policy: trial results | trial results to participants, healthcare professionals,                       |         |
| 47 |                       |                                                                                |         |
| 48 |                       | the public, and other relevant groups (eg, via                                 |         |
| 49 |                       |                                                                                |         |
| 50 |                       | publication, reporting in results databases, or other                          |         |
| 51 |                       |                                                                                |         |
| 52 |                       | data sharing arrangements), including any publication                          |         |
| 53 |                       |                                                                                |         |
| 54 |                       | restrictions                                                                   |         |
| 55 |                       |                                                                                |         |
| 56 |                       |                                                                                |         |
| 57 |                       |                                                                                |         |
| 58 |                       |                                                                                |         |
| 59 |                       |                                                                                |         |
| 60 |                       |                                                                                |         |

1 Dissemination [#31b](#) Authorship eligibility guidelines and any intended use N/A  
 2  
 3 policy: authorship of professional writers  
 4  
 5

6 Dissemination [#31c](#) Plans, if any, for granting public access to the full N/A  
 7  
 8 policy: reproducible protocol, participant-level dataset, and statistical code  
 9  
 10  
 11 research  
 12  
 13

## 14 Appendices

15  
 16  
 17 Informed consent [#32](#) Model consent form and other related documentation N/A  
 18  
 19 materials given to participants and authorised surrogates  
 20  
 21

22  
 23 Biological [#33](#) Plans for collection, laboratory evaluation, and N/A  
 24  
 25 specimens storage of biological specimens for genetic or  
 26  
 27 molecular analysis in the current trial and for future  
 28  
 29 use in ancillary studies, if applicable  
 30  
 31

## 32 Notes:

- 33  
 34  
 35  
 36 • 1: Title page; full title, page no. 1  
 37  
 38  
 39 • 2a: Abstract; trial registration, page no. 2  
 40  
 41  
 42 • 5a: Page 1 and 29 The SPIRIT Explanation and Elaboration paper is distributed under the terms  
 43  
 44 of the Creative Commons Attribution License CC-BY-NC. This checklist was completed on 17.  
 45  
 46 August 2021 using <https://www.goodreports.org/>, a tool made by the [EQUATOR Network](#) in  
 47  
 48 collaboration with [Penelope.ai](#)  
 49  
 50  
 51  
 52  
 53  
 54  
 55  
 56  
 57  
 58  
 59  
 60
